# Supplementary material for: Exploiting the umpolung reactivity of diazo groups: direct access to triazolyl-azaarenes from azaarenes
Source: Royal Society of Chemistry journal article supplement (doi:10.1039/d2cc01897g), 2022-01-01
Supplement: d2cc01897g1.pdf [file d2cc01897g1.pdf]

Supporting Information

**Exploiting Umpolung Reactivity of Diazo Group: Direct access to Triazolyl-Azaarenes from Azaarenes**

*Lalita Devi,<sup>a,b</sup> Prashant Kumar,<sup>a</sup> Ruchir Kant,<sup>c</sup> Namrata Rastogi<sup>\*,a,b</sup>*

<sup>a</sup>Medicinal & Process Chemistry Division, <sup>c</sup>Biochemistry & Structural Biology Division, CSIR-Central Drug Research Institute, Sector 10, Jankipuram Extension, Sitapur Road, P.O. Box 173, Lucknow 226031, India

<sup>b</sup>Academy of Scientific and Innovative Research (AcSIR), Ghaziabad 201002, India

\* Corresponding author's e-mail: [namrata.rastogi@cdri.res.in](mailto:namrata.rastogi@cdri.res.in)

**Table of Contents**

|                                                                                                    |       |
|----------------------------------------------------------------------------------------------------|-------|
| 1. Experimental Section.....                                                                       | 1-2   |
| 2. Details of X-ray Analysis of <b>3e</b> .....                                                    | 3-4   |
| 3. Mass Spectra of <b>3ze-3zf</b> (HRMS) and <b>3zh'-3zj'</b> (ESMS).....                          | 4-6   |
| 4. Spectroscopic Data.....                                                                         | 7-17  |
| 5. References.....                                                                                 | 17    |
| 6. Copies of <sup>1</sup> H, <sup>13</sup> C, <sup>19</sup> F and <sup>31</sup> P NMR Spectra..... | 18-52 |

## 1. Experimental Section

### 1.1 General information

Until mentioned otherwise, all reactions were carried out under nitrogen atmosphere in flame-dried glassware. All reactions were monitored by Thin Layer Chromatography (TLC) and visualization was effected with UV and/or by developing in iodine. Melting points were recorded on a Precision melting point apparatus and are uncorrected. NMR spectra were recorded on a Bruker Avance spectrometer at 400/500 MHz ( $^1\text{H}$ ), 100/125 MHz ( $^{13}\text{C}$ ), 162 MHz ( $^{31}\text{P}$ ) and 376 MHz ( $^{19}\text{F}$ ). Chemical shifts are reported in  $\delta$  (ppm) relative to TMS as the internal standard for  $^1\text{H}$  and  $^{13}\text{C}$ , TFA as the internal standard for  $^{19}\text{F}$  and phosphoric acid as the external standard for  $^{31}\text{P}$ . To describe spin multiplicity, standard abbreviations such as s, d, t, q, m, dd referring to singlet, doublet, triplet, quartet, multiplet and doublet of doublet respectively, are used. The ESI-HRMS spectra were recorded on Agilent 6520-Q-ToF LC/MS system.

All the chemicals, catalysts and solvents were purchased from commercial sources and used as received. The starting azaarenes **1b**, **1g**, **1j-1m**, **1o**, **1p**, **1u** were synthesized according to the standard protocols in literature.<sup>1</sup> All other azaarenes used in reactions were commercially available. The hypervalent iodine diazo reagents **2** were prepared following the reported procedure.<sup>2</sup>

### 1.2 Table S1. Optimization of reaction conditions for pyridine substrates<sup>a</sup>

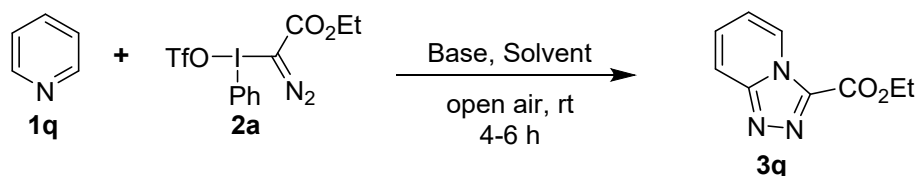

| Entry    | 1q:2a      | Solvent                           | Base (equiv)                                   | Yield (%) <sup>b</sup> |
|----------|------------|-----------------------------------|------------------------------------------------|------------------------|
| 1        | 1:1.2      | $\text{CHCl}_3$                   | $\text{Na}_2\text{CO}_3$ (2)                   | 37                     |
| 2        | 1:2        | $\text{CHCl}_3$                   | $\text{Na}_2\text{CO}_3$ (2)                   | 47                     |
| <b>3</b> | <b>2:1</b> | <b><math>\text{CHCl}_3</math></b> | <b><math>\text{Na}_2\text{CO}_3</math> (2)</b> | <b>68</b>              |
| 4        | 2:1        | DCM                               | $\text{Na}_2\text{CO}_3$ (2)                   | 57                     |

<sup>a</sup>Unless otherwise noted, all reactions were carried out at 0.2 mmol scale of **1q** with specified amounts of **2a** and base in 2 mL solvent for 4-6 h in open air at rt; <sup>b</sup>isolated yields.

### 1.3 General procedure for the conversion of azaarenes **1** into 1,2,4-triazolyl-azaarenes **3**

In an oven dried 10 mL round bottom flask equipped with a magnetic stirring bar, the azaarene **1** (0.1 mmol or 0.2 mmol of pyridines), hypervalent iodine diazo reagent **2** (0.12 mmol or 0.1 mmol for pyridines) and  $\text{Na}_2\text{CO}_3$  (0.2 mmol) were dissolved in chloroform (2

mL). The resulting reaction mixture was stirred at room temperature in open air atmosphere. After reaction completion (4-8 h; TLC monitoring), the reaction mixture was diluted with water (5 mL) and extracted with dichloromethane (5 mL x 3). The organic layer was washed with brine (5 mL x 3), dried over Na<sub>2</sub>SO<sub>4</sub> and concentrated under reduced pressure. The residue was purified by column chromatography on neutral silica gel (100-200 mesh) using hexane/ethyl acetate as eluent to afford the pure product **3**.

#### **1.4 Procedure for the synthesis of [1,2,4]triazolo[3,4-*a*]isoquinoline **4**<sup>3</sup>**

To a solution of ethyl [1,2,4]triazolo[3,4-*a*]isoquinoline-3-carboxylate **3a** (36 mg, 0.15 mmol) in THF (4 mL) was added a solution of LiOH.H<sub>2</sub>O (13 mg, 0.45 mmol) in H<sub>2</sub>O (2 mL). The mixture was stirred for 20 min, acidified with 2N aqueous HCl (pH 6) and extracted with DCM (5 mL x 3). The organic layer was washed with brine (5 mL x 3), dried over anhydrous Na<sub>2</sub>SO<sub>4</sub> and concentrated under reduced pressure. The residue was purified by column chromatography on neutral silica gel (100-200 mesh) using ethyl acetate/hexane (4:1) as eluent to afford the pure [1,2,4]triazolo[3,4-*a*]isoquinoline **4**.

#### **1.5 Procedure for the synthesis of [1,2,4]triazolo[3,4-*a*]isoquinolin-3-ylmethanol **5**<sup>4</sup>**

To a solution of ethyl [1,2,4]triazolo[3,4-*a*]isoquinoline-3-carboxylate **3a** (36 mg, 0.15 mmol) in anhydrous THF (5 mL) was added DIBAL-H (0.4 mL, 0.4 mmol, 1.0M) dropwise at 0 °C. The reaction mixture was stirred at 0 °C for another 1.5 h. Upon completion of reaction (TLC monitoring), the reaction was quenched with water (0.5 mL), 15% NaOH aqueous solution (0.2 mL) and DCM (5 mL). The resulting reaction mixture was warmed to room temperature, MgSO<sub>4</sub> was added and stirred for 15 min and filtered. The filter cake was washed with a mixed solvent of DCM/MeOH (10/1 (v/v), 10mL x 4). The filtrate was concentrated *in vacuo* and residue was purified by column chromatography on neutral silica gel (100-200 mesh) using MeOH/DCM (1:20) as eluent to afford the pure [1,2,4]triazolo[3,4-*a*]isoquinolin-3-ylmethanol **5**.

#### **1.6 Procedure for the synthesis of *N*-benzyl-[1,2,4]triazolo[3,4-*a*]isoquinoline-3-carboxamide **6**<sup>5</sup>**

In an oven dried 10 mL round bottom flask equipped with magnetic stirring bar, the ethyl [1,2,4]triazolo[3,4-*a*]isoquinoline-3-carboxylate **3a** (36 mg, 0.15 mmol) and benzylamine (18 mg, 0.17 mmol) were dissolved in EtOH (5 mL). The reaction mixture was refluxed for 2 h. Upon completion of reaction (TLC monitoring), EtOH was evaporated and residue was purified by column chromatography on neutral silica gel (100-200 mesh) using ethyl acetate/hexane (1:4) as eluent to afford the pure *N*-benzyl-[1,2,4]triazolo[3,4-*a*]isoquinoline-3-carboxamide **6**.

## 2. Details of X-ray Analysis of 3e

A good quality colorless single crystal of size 0.18 x 0.14 x 0.09 mm, was selected under a polarizing microscope and was mounted on a glass fiber for data collection. Single crystal X-ray data for compound **3e** was collected on the Rigaku Kappa 3 circle diffractometer equipped with the AFC12 goniometer and enhanced sensitivity (HG) Saturn724+ CCD detector in the 4x4 bin mode using the monochromated Mo-K $\alpha$  radiation generated from the microfocus sealed tube MicroMax-003 X-ray generator equipped with specially designed confocal multilayer optics. Data collection was performed using  $\omega$ -scans of 0.5 $^\circ$  steps at 293(2) K. Cell determination, data collection and data reduction was performed using the Rigaku CrystalClear-SM Expert 2.1 b24 software.<sup>6</sup> Structure solution and refinement were performed by using SHELXTL-NT.<sup>7</sup> Refinement of coordinates and anisotropic thermal parameters of non-hydrogen atoms were carried out by the full-matrix least-squares method. The hydrogen atoms attached to carbon atoms were generated with idealized geometries and isotropically refined using a riding model.

**Crystallization:** Crystals of compound **3e** were grown from the solvent Chloroform: Methanol (1:3) by slow evaporation method (Figure S1; Table S2).

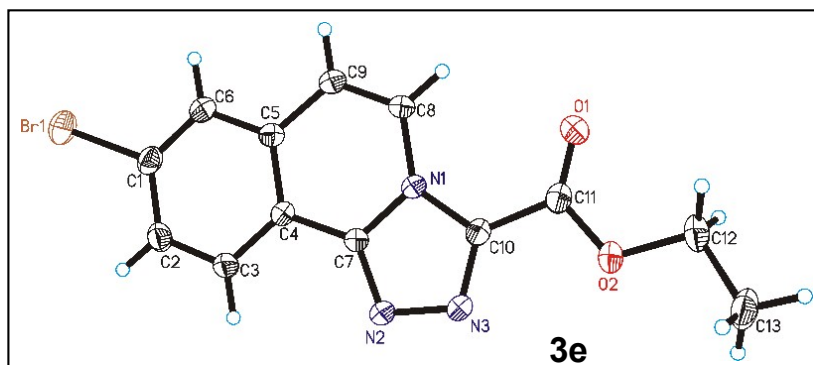

**Figure S1.** ORTEP diagram drawn with 30% ellipsoid probability for non-H atoms of the crystal structure of compound **3e** determined at 293 K.

**Table S2.** Crystal data and structure refinement details for **3e**

| Compound          | <b>3e</b>                                                        |
|-------------------|------------------------------------------------------------------|
| Empirical formula | C <sub>13</sub> H <sub>10</sub> Br N <sub>3</sub> O <sub>2</sub> |
| Formula weight    | 320.15                                                           |
| Crystal System    | Triclinic                                                        |
| Space group       | P-1                                                              |
| <i>a</i> (Å)      | 7.692(6)                                                         |
| <i>b</i> (Å)      | 7.901(2)                                                         |
| <i>c</i> (Å)      | 11.323(6)                                                        |
| $\alpha$ (°)      | 72.27(5)                                                         |
| $\beta$ (°)       | 88.36(9)                                                         |

|                                  |          |
|----------------------------------|----------|
| $\gamma$ (°)                     | 75.68(6) |
| $V$ (Å <sup>3</sup> )            | 634.3(6) |
| $Z$                              | 2        |
| $D_c$ (g/cm <sup>3</sup> )       | 1.676    |
| $F_{000}$                        | 320      |
| $\mu$ (mm <sup>-1</sup> )        | 4.447    |
| $\theta_{\max}$ (°)              | 68.77    |
| Total reflections                | 12288    |
| Unique reflections               | 2281     |
| Reflections [ $I > 2\sigma(I)$ ] | 1672     |
| Parameters                       | 173      |
| $R_{\text{int}}$                 | 0.1058   |
| Goodness-of-fit                  | 1.124    |
| $R$ [ $F^2 > 2\sigma(F^2)$ ]     | 0.0545   |
| $wR$ ( $F^2$ , all data)         | 0.1799   |
| CCDC No.                         | 2150459  |

### 3. Mass Spectra of 3ze-3zf (HRMS) and 3zh'-3zj' (ESMS)

| Sample Name   | HRMS22I28JAN22 | Position    | Vial 22     | Instrument Name | Instrument 1 | User Name              |                       |
|---------------|----------------|-------------|-------------|-----------------|--------------|------------------------|-----------------------|
| Inj Vol       | 1              | InjPosition |             | SampleType      | Sample       | IRM Calibration Status | Some Ions Missed      |
| Data Filename | NRLD-667.d     | ACQ Method  | ISOCRATIC.m | Comment         |              | Acquired Time          | 1/28/2022 12:42:32 PM |

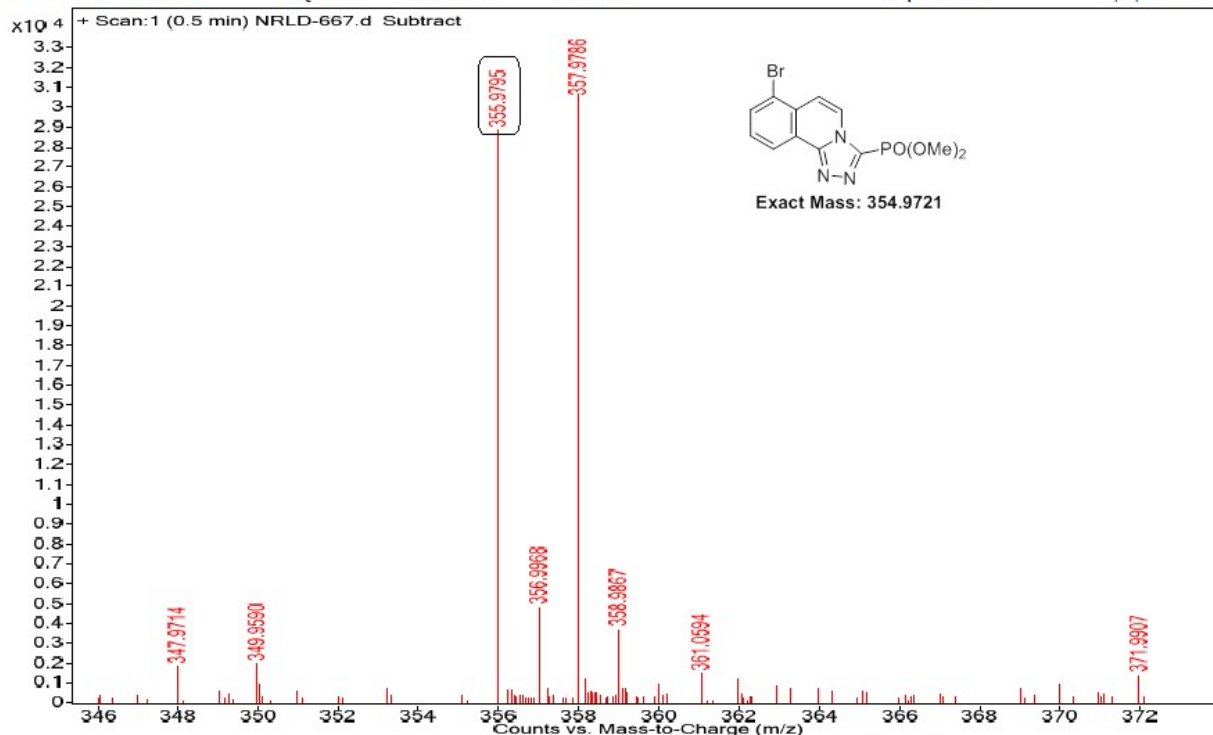

Figure S2. HRMS of 3ze

| Sample Name   | HRMS221033JAN16 | Position    | Vial 16     | Instrument Name | Instrument 1 | User Name     | IRM Calibration Status | Some Ions Missed     |
|---------------|-----------------|-------------|-------------|-----------------|--------------|---------------|------------------------|----------------------|
| Inj Vol       | 1               | InjPosition |             | SampleType      | Sample       |               |                        |                      |
| Data Filename | NRLD-682.d      | ACQ Method  | ISOCRATIC.m | Comment         |              | Acquired Time |                        | 1/3/2022 12:34:50 PM |

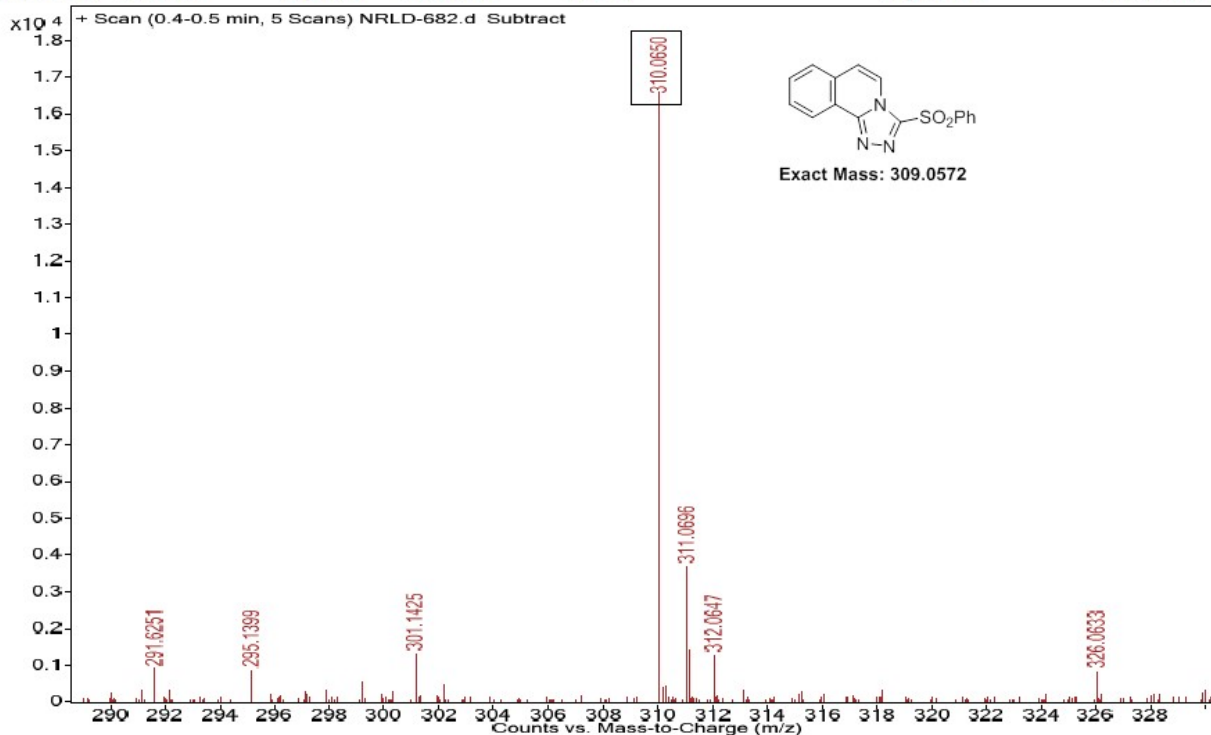

Figure S3. HRMS of 3zf

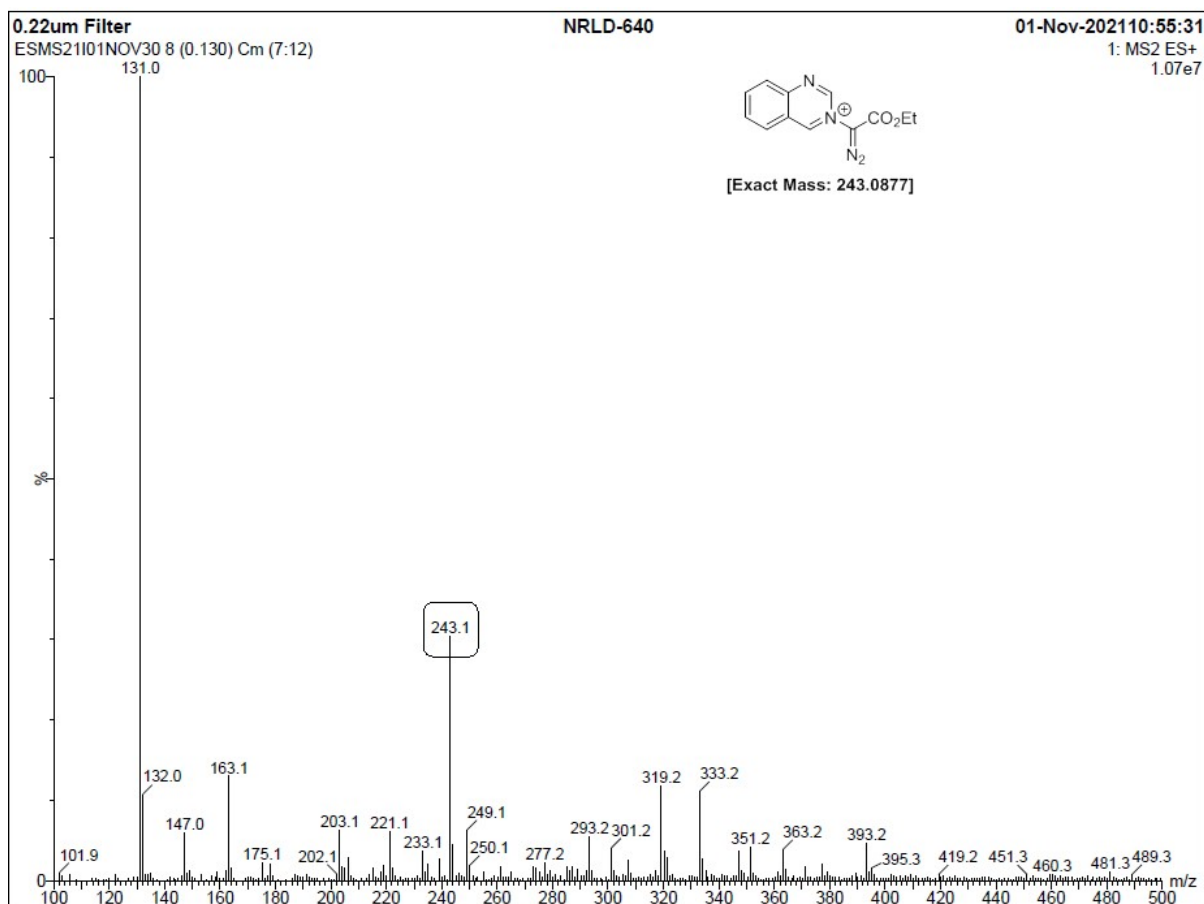

Figure S4. ESMS of 3zh'

Printed: Wed May 04 13:38:21 2022

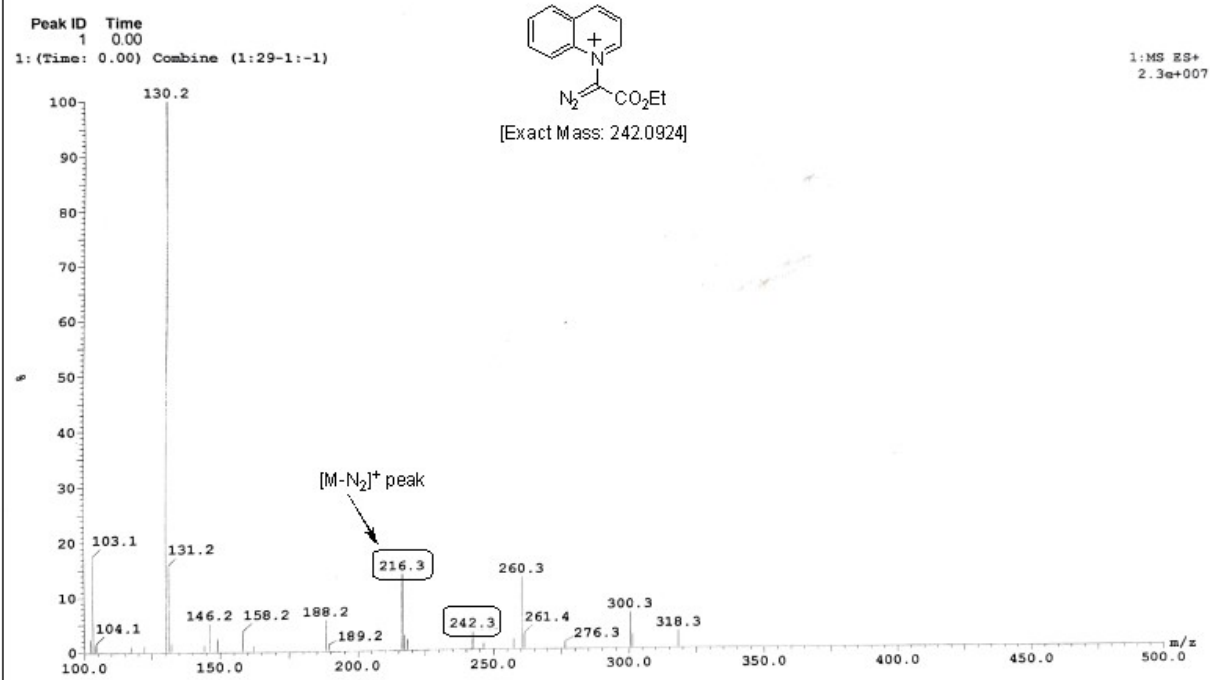

Figure S5. ESMS of 3zi'

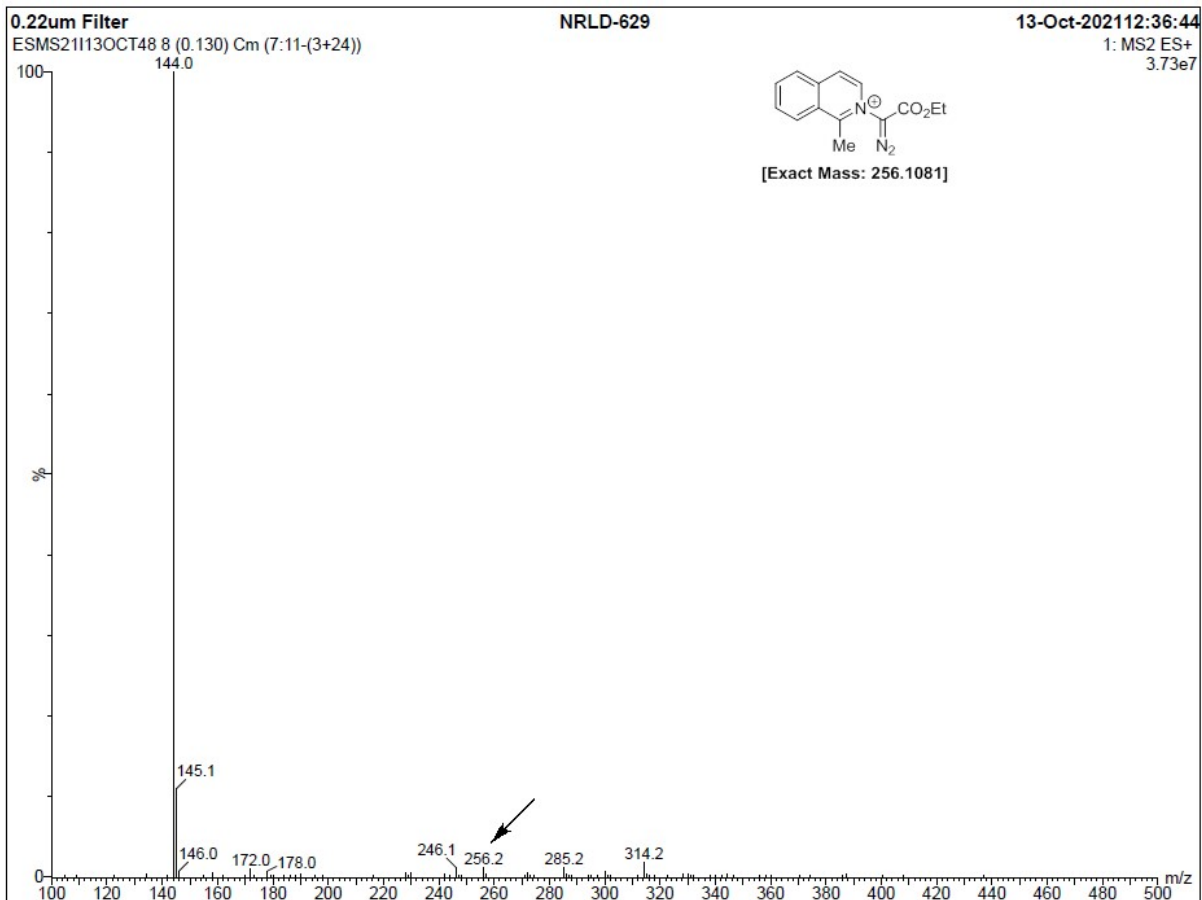

Figure S6. ESMS of 3zj'

#### 4. Spectroscopic Data

##### Ethyl [1,2,4]triazolo[3,4-*a*]isoquinoline-3-carboxylate (3a)

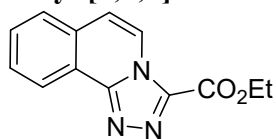

White solid; yield 71% (17 mg);  $R_f$  0.50 (50% EtOAc/hexane); Mp 168-169 °C;  $^1\text{H NMR}$  (400 MHz,  $\text{CDCl}_3$ )  $\delta$  8.84-8.87 (m, 2H), 7.74-7.83 (m, 3H), 7.28 (d merged with solvent peak,  $J = 7.4$  Hz, 1H), 4.60 (q,  $J = 7.1$  Hz, 2H), 1.53 (t,  $J = 7.2$  Hz, 3H);  $^{13}\text{C NMR}$  (125 MHz,  $\text{CDCl}_3$ )  $\delta$  158.48, 150.24, 139.44, 130.97, 130.19, 129.44, 127.13, 124.60, 121.69, 120.91, 116.92, 62.50, 14.31; **HRMS** for  $\text{C}_{13}\text{H}_{11}\text{N}_3\text{O}_2$ : calcd.  $(\text{M}+\text{H})^+$ : 242.0924, found: 242.0931

##### Ethyl 9-methoxy-[1,2,4]triazolo[3,4-*a*]isoquinoline-3-carboxylate (3b)

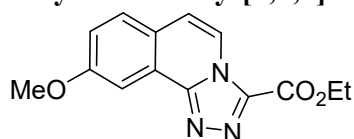

White solid; yield 70% (19 mg);  $R_f$  0.50 (60% EtOAc/hexane); Mp 173-174 °C;  $^1\text{H NMR}$  (400 MHz,  $\text{CDCl}_3$ )  $\delta$  8.78 (d,  $J = 7.3$  Hz, 1H), 8.22 (d,  $J = 2.4$  Hz, 1H), 7.72 (d,  $J = 8.8$  Hz, 1H), 7.34 (dd,  $J = 8.8$  Hz, 2.6 Hz, 1H), 7.24 (d,  $J = 7.3$  Hz, 1H), 4.60 (q,  $J = 7.1$  Hz, 2H), 4.02 (s, 3H), 1.53 (t,  $J = 7.1$  Hz, 3H);  $^{13}\text{C NMR}$  (100 MHz,  $\text{CDCl}_3$ )  $\delta$  160.41, 158.49, 150.15, 139.41, 128.71, 124.33, 122.33, 121.79, 119.46, 116.63, 104.67, 62.44, 56.00, 14.32; **HRMS** for  $\text{C}_{14}\text{H}_{13}\text{N}_3\text{O}_3$ : calcd.  $(\text{M}+\text{H})^+$ : 272.1030, found: 272.1027

##### Ethyl 7-chloro-[1,2,4]triazolo[3,4-*a*]isoquinoline-3-carboxylate (3c)

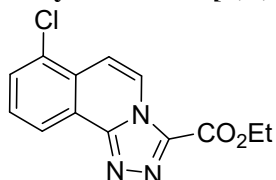

White solid; yield 65% (18 mg);  $R_f$  0.50 (50% EtOAc/hexane); Mp 164-165 °C;  $^1\text{H NMR}$  (400 MHz,  $\text{CDCl}_3$ )  $\delta$  8.96 (d,  $J = 7.7$  Hz, 1H), 8.80 (d,  $J = 8.0$  Hz, 1H), 7.82 (d,  $J = 7.8$  Hz, 1H), 7.74 (d,  $J = 7.6$  Hz, 1H), 7.69 (t,  $J = 7.9$  Hz, 1H), 4.61 (q,  $J = 7.1$  Hz, 2H), 1.54 (t,  $J = 7.2$  Hz, 3H);  $^{13}\text{C NMR}$  (100 MHz,  $\text{CDCl}_3$ )  $\delta$  158.32, 149.71, 139.57, 131.92, 131.26, 129.82, 128.10, 123.38, 122.67, 122.43, 113.10, 62.68, 14.29; **HRMS** for  $\text{C}_{13}\text{H}_{10}\text{ClN}_3\text{O}_2$ : calcd.  $(\text{M}+\text{H})^+$ : 276.0534, found: 276.0535

##### Ethyl 7-bromo-[1,2,4]triazolo[3,4-*a*]isoquinoline-3-carboxylate (3d)

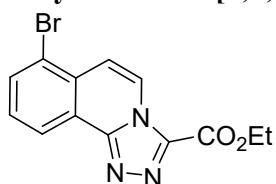



White solid; yield 60% (19 mg);  $R_f$  0.50 (50% EtOAc/hexane); Mp 185-186 °C;  $^1\text{H NMR}$  (400 MHz,  $\text{CDCl}_3$ )  $\delta$  8.95 (d,  $J = 7.7$  Hz, 1H), 8.85 (d,  $J = 8.0$  Hz, 1H), 8.01 (dd,  $J = 7.8$  Hz, 1.0 Hz, 1H), 7.72 (d,  $J = 7.7$  Hz, 1H), 7.61 (t,  $J = 7.9$  Hz, 1H), 4.62 (q,  $J = 7.2$  Hz, 2H), 1.54 (t,  $J = 7.2$  Hz, 3H);  $^{13}\text{C NMR}$  (100 MHz,  $\text{CDCl}_3$ )  $\delta$  158.31, 149.69, 139.51, 134.83, 130.12, 129.51, 124.08, 122.78, 122.46, 122.10, 115.70, 62.68, 14.29; ; **HRMS** for  $\text{C}_{13}\text{H}_{10}\text{BrN}_3\text{O}_2$ : calcd. (M+H) $^+$ : 320.0029, found: 320.0037

**Ethyl 8-bromo-[1,2,4]triazolo[3,4-*a*]isoquinoline-3-carboxylate (3e)**

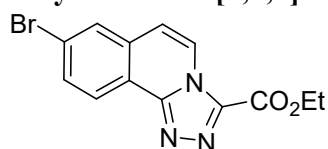

White solid; yield 63% (20 mg);  $R_f$  0.50 (50% EtOAc/hexane); Mp 206-207 °C;  $^1\text{H NMR}$  (500 MHz,  $\text{CDCl}_3$ )  $\delta$  8.91 (d,  $J = 7.5$  Hz, 1H), 8.72 (d,  $J = 8.5$  Hz, 1H), 7.99 (s, 1H), 7.87 (d,  $J = 8.6$  Hz, 1H), 7.21 (t,  $J = 7.4$  Hz, 1H), 4.60 (q,  $J = 7.1$  Hz, 2H), 1.52 (t,  $J = 7.1$  Hz, 3H);  $^{13}\text{C NMR}$  (125 MHz,  $\text{CDCl}_3$ )  $\delta$  158.37, 149.82, 139.58, 132.78, 131.54, 129.65, 126.19, 125.54, 122.91, 119.62, 115.73, 62.63, 14.28; **HRMS** for  $\text{C}_{13}\text{H}_{10}\text{BrN}_3\text{O}_2$ : calcd. (M+H) $^+$ : 320.0029, found: 320.0036

**Selected X-Ray Crystallographic data for 3e:**  $\text{C}_{13}\text{H}_{10}\text{BrN}_3\text{O}_2$ ,  $M = 320.15$ , Triclinic,  $P - 1$ ,  $a = 7.692(6)$  Å,  $b = 7.901(2)$  Å,  $c = 11.323(6)$  Å,  $V = 634.3(6)$  Å $^3$ ,  $\alpha = 72.27(5)$  °,  $\beta = 88.36(9)$  °,  $\gamma = 75.68(6)$  °,  $Z = 2$ ,  $D_c = 1.676$  g/cm $^3$ ,  $\mu$  (Mo-K $\alpha$ ) = 4.447 mm $^{-1}$ ,  $F(000) = 320$ , Reflections collected: Unique 12288/2281 [ $R_{\text{int}} = 0.1058$ ]. Final R indices [ $I > 2\sigma(I)$ ],  $R1 = 0.0545$ ,  $wR2 = 0.1799$

**Ethyl 10-bromo-[1,2,4]triazolo[3,4-*a*]isoquinoline-3-carboxylate (3f)**

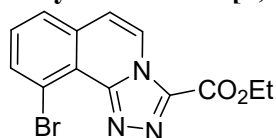

White solid; yield 47% (15 mg);  $R_f$  0.50 (50% EtOAc/hexane); Mp 230-231 °C;  $^1\text{H NMR}$  (400 MHz,  $\text{CDCl}_3$ )  $\delta$  8.96 (d,  $J = 7.4$  Hz, 1H), 8.06 (d,  $J = 7.8$  Hz, 1H), 7.77 (d,  $J = 7.9$  Hz, 1H), 7.55 (t,  $J = 7.8$  Hz, 1H), 7.27 (d,  $J = 7.3$  Hz, 1H), 4.60 (q,  $J = 7.1$  Hz, 2H), 1.53 (t,  $J = 7.1$  Hz, 3H);  $^{13}\text{C NMR}$  (125 MHz,  $\text{CDCl}_3$ )  $\delta$  158.57, 148.99, 139.18, 135.65, 132.64, 130.65, 126.61, 122.30, 120.87, 120.12, 117.04, 62.58, 14.24; **HRMS** for  $\text{C}_{13}\text{H}_{10}\text{BrN}_3\text{O}_2$ : calcd. (M+H) $^+$ : 320.0029, found: 320.0031

**Ethyl 7-iodo-[1,2,4]triazolo[3,4-*a*]isoquinoline-3-carboxylate (3g)**

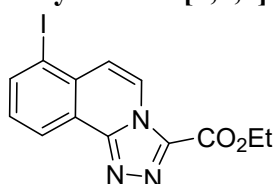

White solid; yield 52% (19 mg);  $R_f$  0.50 (50% EtOAc/hexane); Mp 181-182 °C;  $^1\text{H NMR}$  (500 MHz,  $\text{CDCl}_3$ )  $\delta$  8.91 (d,  $J = 7.7$  Hz, 1H), 8.88 (d,  $J = 8.1$  Hz, 1H), 8.29 (d,  $J = 7.7$  Hz, 1H), 7.60 (d,  $J = 7.7$  Hz, 1H), 7.45 (t,  $J = 7.8$  Hz, 1H), 4.61 (q,  $J = 7.1$  Hz, 2H), 1.54 (t,  $J = 7.1$  Hz, 3H);  $^{13}\text{C NMR}$  (125 MHz,  $\text{CDCl}_3$ )  $\delta$  158.30, 149.74, 141.95, 139.39, 132.18, 130.45, 124.99, 122.91, 121.86, 120.59, 97.58, 62.66, 14.29; **HRMS** for  $\text{C}_{13}\text{H}_{10}\text{IN}_3\text{O}_2$ : calcd. (M+H) $^+$ : 367.9890, found: 367.9887

**Ethyl 7-nitro-[1,2,4]triazolo[3,4-*a*]isoquinoline-3-carboxylate (3h)**

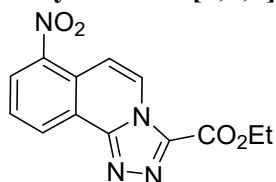

White solid; yield 56% (16 mg);  $R_f$  0.50 (60% EtOAc/hexane); Mp 181-182 °C;  $^1\text{H NMR}$  (400 MHz,  $\text{CDCl}_3$ )  $\delta$  9.23 (d,  $J = 8.0$  Hz, 1H), 9.07 (d,  $J = 7.9$  Hz, 1H), 8.50 (d,  $J = 7.8$  Hz, 1H), 8.14 (d,  $J = 7.9$  Hz, 1H), 7.91 (t,  $J = 8.0$  Hz, 1H), 4.63 (q,  $J = 7.1$  Hz, 2H), 1.55 (t,  $J = 7.2$  Hz, 3H);  $^{13}\text{C NMR}$  (125 MHz,  $\text{CDCl}_3$ )  $\delta$  158.11, 148.91, 145.83, 139.84, 130.37, 128.90, 127.71, 124.80, 123.34, 122.71, 111.23, 62.93, 14.26; **HRMS** for  $\text{C}_{13}\text{H}_{10}\text{N}_4\text{O}_4$ : calcd. (M+H) $^+$ : 287.0775, found: 287.0777

**Ethyl 7-formyl-[1,2,4]triazolo[3,4-*a*]isoquinoline-3-carboxylate (3i)**

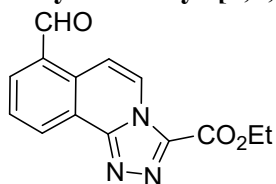

White solid; yield 60% (16 mg);  $R_f$  0.50 (60% EtOAc/hexane); Mp 171-172 °C;  $^1\text{H NMR}$  (500 MHz,  $\text{CDCl}_3$ )  $\delta$  10.38 (s, 1H), 9.18 (d,  $J = 8.0$  Hz, 1H), 9.03 (d,  $J = 7.8$  Hz, 1H), 8.79 (d,  $J = 7.8$  Hz, 1H), 8.24 (dd,  $J = 7.4$  Hz, 1.1 Hz, 1H), 7.95-7.98 (m, 1H), 4.62 (q,  $J = 7.2$  Hz, 2H), 1.54 (t,  $J = 7.1$  Hz, 3H);  $^{13}\text{C NMR}$  (125 MHz,  $\text{CDCl}_3$ )  $\delta$  192.59, 158.27, 149.47, 139.61, 138.70, 130.88, 130.43, 128.97, 128.57, 124.30, 122.14, 112.85, 62.71, 14.28; **HRMS** for  $\text{C}_{14}\text{H}_{11}\text{N}_3\text{O}_3$ : calcd. (M+H) $^+$ : 270.0873, found: 270.0880

**Ethyl 7-phenyl-[1,2,4]triazolo[3,4-*a*]isoquinoline-3-carboxylate (3j)**

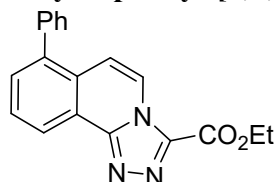

White solid; yield 47% (15 mg);  $R_f$  0.50 (50% EtOAc/hexane); Mp 199-200 °C;  $^1\text{H NMR}$  (400 MHz,  $\text{CDCl}_3$ )  $\delta$  8.91 (d,  $J = 7.9$  Hz, 1H), 8.79 (d,  $J = 7.6$  Hz, 1H), 7.81 (d,  $J = 7.8$  Hz, 1H), 7.72 (d,  $J = 7.4$  Hz, 1H), 7.45-7.55 (m, 5H), 7.38 (d,  $J = 7.6$  Hz, 1H), 4.59 (q,  $J = 7.1$  Hz, 2H), 1.52 (t,  $J = 7.2$  Hz, 3H);  $^{13}\text{C NMR}$  (125 MHz,  $\text{CDCl}_3$ )  $\delta$  158.45, 150.51, 140.40,

139.43, 139.05, 131.97, 129.85, 129.00, 128.71, 128.20, 128.08, 123.89, 121.46, 121.41, 114.92, 62.49, 14.31; **HRMS** for C<sub>19</sub>H<sub>15</sub>N<sub>3</sub>O<sub>2</sub>: calcd. (M+H)<sup>+</sup>: 318.1237, found: 318.1245

**Ethyl 7-(4-methoxyphenyl)-[1,2,4]triazolo[3,4-*a*]isoquinoline-3-carboxylate (3k)**

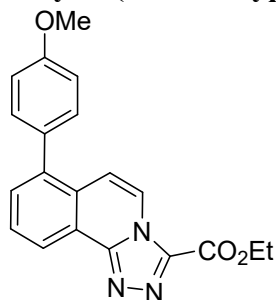

White solid; yield 63% (22 mg); *R<sub>f</sub>* 0.50 (60% EtOAc/hexane); Mp 210-211 °C; **<sup>1</sup>H NMR** (400 MHz, CDCl<sub>3</sub>) δ 8.88 (d, *J* = 7.9 Hz, 1H), 8.79 (d, *J* = 7.7 Hz, 1H), 7.78 (t, *J* = 7.8 Hz, 1H), 7.70 (d, *J* = 6.7 Hz, 1H), 7.37-7.41 (m, 3H), 7.06 (d, *J* = 8.6 Hz, 2H), 4.59 (q, *J* = 7.1 Hz, 2H), 3.91 (s, 3H), 1.52 (t, *J* = 7.1 Hz, 3H); **<sup>13</sup>C NMR** (125 MHz, CDCl<sub>3</sub>) δ 159.57, 158.47, 150.57, 140.14, 139.41, 131.98, 131.36, 130.99, 128.98, 128.35, 123.55, 121.44, 121.31, 115.02, 114.18, 62.45, 55.43, 14.30; ; **HRMS** for C<sub>20</sub>H<sub>17</sub>N<sub>3</sub>O<sub>3</sub>: calcd. (M+H)<sup>+</sup>: 348.1343, found: 348.1343

**Benzyl 7-(4-fluorophenyl)-[1,2,4]triazolo[3,4-*a*]isoquinoline-3-carboxylate (3l)**

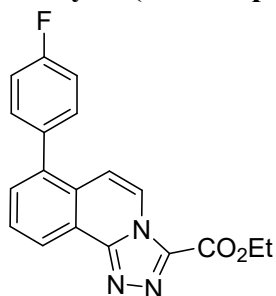

White solid; yield 45% (15 mg); *R<sub>f</sub>* 0.50 (50% EtOAc/hexane); Mp 242-243 °C; **<sup>1</sup>H NMR** (400 MHz, CDCl<sub>3</sub>) δ 8.94 (d, *J* = 8.0 Hz, 1H), 8.83 (d, *J* = 7.7 Hz, 1H), 7.82 (t, *J* = 7.8 Hz, 1H), 7.72 (d, *J* = 7.4 Hz, 1H), 7.43-7.47 (m, 2H), 7.34 (d, *J* = 7.7 Hz, 2H), 7.23-7.28 (m merged with solvent peak, 2H), 4.61 (q, *J* = 7.1 Hz, 2H), 1.55 (t, *J* = 7.1 Hz, 3H); **<sup>13</sup>C NMR** (100 MHz, CDCl<sub>3</sub>) δ 162.69 (d, *J*<sub>C-F</sub> = 246.4 Hz), 158.42, 150.41, 139.44, 139.28, 135.00 (d, *J*<sub>C-F</sub> = 3.4 Hz), 132.00, 131.49 (d, *J*<sub>C-F</sub> = 8.0 Hz), 129.01, 128.22, 124.06, 121.64, 121.44, 115.75 (d, *J*<sub>C-F</sub> = 21.4 Hz), 114.60, 62.52, 14.29; **<sup>19</sup>F NMR** (376 MHz, CDCl<sub>3</sub>) δ -113.79 (s); **HRMS** for C<sub>19</sub>H<sub>14</sub>FN<sub>3</sub>O<sub>2</sub>: calcd. (M+H)<sup>+</sup>: 336.1143, found: 336.1144

**Ethyl 7-(thiophen-3-yl)-[1,2,4]triazolo[3,4-*a*]isoquinoline-3-carboxylate (3m)**

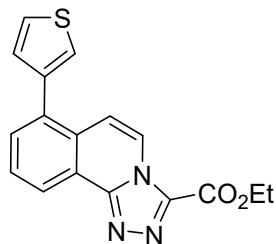

White solid; yield 46% (15 mg);  $R_f$  0.50 (50% EtOAc/hexane); Mp 149-150 °C;  $^1\text{H NMR}$  (400 MHz,  $\text{CDCl}_3$ )  $\delta$  8.88 (dd,  $J = 6.6$  Hz,  $J = 2.7$  Hz, 1H), 8.82 (d,  $J = 7.7$  Hz, 1H), 7.75-7.80 (m, 2H), 7.50-7.54 (m, 2H), 7.42-7.43 (m, 1H), 7.26-7.28 (m, 1H merged with solvent peak), 4.60 (q,  $J = 7.1$  Hz, 2H), 1.53 (t,  $J = 7.1$  Hz, 3H);  $^{13}\text{C NMR}$  (100 MHz,  $\text{CDCl}_3$ )  $\delta$  158.43, 150.44, 139.43, 135.14, 131.91, 129.08, 129.04, 128.40, 126.42, 124.45, 123.92, 121.54, 121.45, 114.80, 62.50, 14.30; **HRMS** for  $\text{C}_{17}\text{H}_{13}\text{N}_3\text{O}_2\text{S}$ : calcd.  $(\text{M}+\text{H})^+$ : 324.0801, found: 324.0803

**Ethyl 6-bromo-[1,2,4]triazolo[3,4-*a*]isoquinoline-3-carboxylate (3n)**

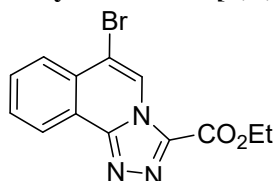

Yellow solid; yield 44% (14 mg);  $R_f$  0.50 (50% EtOAc/hexane); Mp 171-172 °C;  $^1\text{H NMR}$  (400 MHz,  $\text{CDCl}_3$ )  $\delta$  9.24 (s, 1H), 8.90 (d,  $J = 7.6$  Hz, 1H), 8.19 (d,  $J = 8.2$  Hz, 1H), 7.82-7.90 (m, 2H), 4.61 (q,  $J = 7.1$  Hz, 2H), 1.54 (t,  $J = 7.2$  Hz, 3H);  $^{13}\text{C NMR}$  (100 MHz,  $\text{CDCl}_3$ )  $\delta$  158.29, 149.57, 138.91, 131.77, 130.42, 129.11, 127.22, 124.88, 122.54, 120.64, 113.57, 62.78, 14.27; **HRMS** for  $\text{C}_{13}\text{H}_{10}\text{BrN}_3\text{O}_2$ : calcd.  $(\text{M}+\text{H})^+$ : 320.0029, found: 320.0030

**Ethyl 6-phenyl-[1,2,4]triazolo[3,4-*a*]isoquinoline-3-carboxylate (3o)**

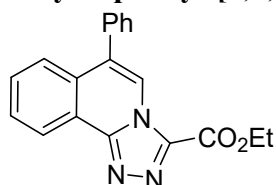

White solid; yield 69% (22 mg);  $R_f$  0.50 (40% EtOAc/hexane); Mp 210-211 °C;  $^1\text{H NMR}$  (400 MHz,  $\text{CDCl}_3$ )  $\delta$  8.97 (d,  $J = 7.7$  Hz, 1H), 8.86 (s, 1H), 7.69-7.80 (m, 3H), 7.50-7.55 (m, 5H), 4.59 (q,  $J = 7.1$  Hz, 2H), 1.52 (t,  $J = 7.1$  Hz, 3H);  $^{13}\text{C NMR}$  (100 MHz,  $\text{CDCl}_3$ )  $\delta$  158.52, 149.92, 139.51, 135.22, 130.86, 130.40, 130.38, 130.07, 129.30, 128.83, 128.75, 126.22, 124.86, 120.93, 120.36, 62.49, 14.30; **HRMS** for  $\text{C}_{19}\text{H}_{15}\text{N}_3\text{O}_2$ : calcd.  $(\text{M}+\text{H})^+$ : 318.1237, found: 318.1240

**Ethyl 6-(4-methoxyphenyl)-[1,2,4]triazolo[3,4-*a*]isoquinoline-3-carboxylate (3p)**

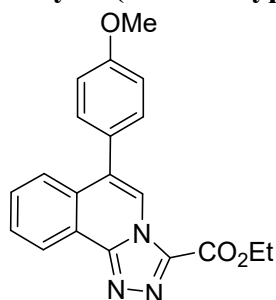

White solid; yield 46% (16 mg);  $R_f$  0.50 (60% EtOAc/hexane); Mp 142-143 °C;  $^1\text{H NMR}$  (500 MHz,  $\text{CDCl}_3$ )  $\delta$  8.95 (d,  $J = 7.6$  Hz, 1H), 8.83 (s, 1H), 7.76-7.79 (m, 1H), 7.70-7.73 (m, 1H), 7.43 (d,  $J = 8.3$  Hz, 2H), 7.07 (d,  $J = 8.4$  Hz, 2H), 4.58 (q,  $J = 7.1$  Hz, 2H), 3.91 (s, 3H), 1.52 (t,  $J = 7.1$  Hz, 3H);  $^{13}\text{C NMR}$  (125 MHz,  $\text{CDCl}_3$ )  $\delta$  160.04, 158.54, 149.91, 139.46, 131.23, 130.80, 130.67, 130.10, 129.22, 127.39, 126.25, 124.85, 120.93, 120.20, 114.29, 62.45, 55.45, 14.29; **HRMS** for  $\text{C}_{20}\text{H}_{17}\text{N}_3\text{O}_3$ : calcd. (M+H) $^+$ : 348.1343, found: 348.1344

**Ethyl [1,2,4]triazolo[4,3-*a*]pyridine-3-carboxylate (3q)**

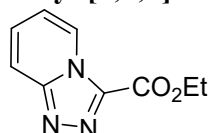

White solid; yield 68% (13 mg);  $R_f$  0.50 (80% EtOAc/hexane); Mp 152-153 °C;  $^1\text{H NMR}$  (500 MHz,  $\text{CDCl}_3$ )  $\delta$  9.18 (d,  $J = 6.9$  Hz, 1H), 7.97 (d,  $J = 9.2$  Hz, 1H), 7.48-7.51 (m, 1H), 7.12 (t,  $J = 6.8$  Hz, 1H), 4.59 (q,  $J = 7.1$  Hz, 2H), 1.52 (t,  $J = 7.1$  Hz, 3H);  $^{13}\text{C NMR}$  (125 MHz,  $\text{CDCl}_3$ )  $\delta$  158.45, 151.45, 137.81, 129.19, 125.92, 116.60, 116.00, 62.38, 14.30; **HRMS** for  $\text{C}_9\text{H}_9\text{N}_3\text{O}_2$ : calcd. (M+H) $^+$ : 192.0768, found: 192.0763

**Ethyl 7-formyl-[1,2,4]triazolo[4,3-*a*]pyridine-3-carboxylate (3r)**

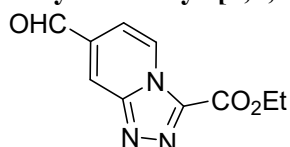

White solid; yield 46% (10 mg);  $R_f$  0.50 (60% EtOAc/hexane); Mp 153-154 °C;  $^1\text{H NMR}$  (500 MHz,  $\text{CDCl}_3$ )  $\delta$  10.12 (s, 1H), 9.25 (d,  $J = 7.2$  Hz, 1H), 8.44 (s, 1H), 7.59 (d,  $J = 7.2$  Hz, 1H), 4.62 (q,  $J = 7.2$  Hz, 2H), 1.53 (t,  $J = 7.1$  Hz, 3H);  $^{13}\text{C NMR}$  (125 MHz,  $\text{CDCl}_3$ )  $\delta$  188.86, 158.11, 151.06, 138.81, 136.06, 126.78, 122.23, 111.95, 62.90, 14.25; **HRMS** for  $\text{C}_{10}\text{H}_9\text{N}_3\text{O}_3$ : calcd. (M+H) $^+$ : 220.0717, found: 220.0715

**Ethyl 7-acetyl-[1,2,4]triazolo[4,3-*a*]pyridine-3-carboxylate (3s)**

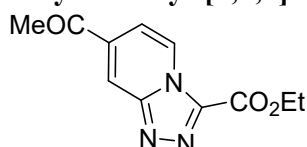

White solid; yield 55% (12 mg);  $R_f$  0.50 (70% EtOAc/hexane); Mp 219-220 °C;  $^1\text{H NMR}$  (500 MHz,  $\text{CDCl}_3$ )  $\delta$  9.18 (d,  $J = 7.3$  Hz, 1H), 8.49 (s, 1H), 7.67 (dd,  $J = 7.3$  Hz, 1.4 Hz, 1H),

4.60 (q,  $J = 7.2$  Hz, 2H), 2.73 (s, 3H), 1.53 (t,  $J = 7.1$  Hz, 3H);  $^{13}\text{C}$  NMR (125 MHz,  $\text{CDCl}_3$ )  $\delta$  194.81, 158.16, 151.18, 138.54, 136.74, 126.01, 118.00, 113.59, 62.77, 26.19, 14.26; HRMS for  $\text{C}_{11}\text{H}_{11}\text{N}_3\text{O}_3$ : calcd.  $(\text{M}+\text{H})^+$ : 234.0873, found: 234.0864

### Ethyl 7-phenyl-[1,2,4]triazolo[4,3-*a*]pyridine-3-carboxylate (3t)

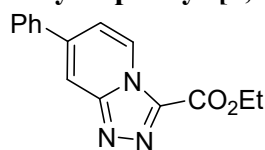

White solid; yield 37% (10 mg);  $R_f$  0.50 (60% EtOAc/hexane); Mp 199-200 °C;  $^1\text{H}$  NMR (400 MHz,  $\text{CDCl}_3$ )  $\delta$  9.19 (dd,  $J = 7.3$  Hz, 1.0 Hz, 1H), 8.11-8.11 (m, 1H), 7.69-7.71 (m, 2H), 7.47-7.56 (m, 3H), 7.40 (dd,  $J = 7.3$  Hz, 1.2 Hz, 1H) 4.60 (q,  $J = 7.1$  Hz, 2H), 1.53 (t,  $J = 7.2$  Hz, 3H);  $^{13}\text{C}$  NMR (100 MHz,  $\text{CDCl}_3$ )  $\delta$  158.45, 152.21, 142.39, 137.57, 137.08, 129.57, 129.42, 127.10, 125.71, 116.25, 112.63, 62.39, 14.32; HRMS for  $\text{C}_{15}\text{H}_{13}\text{N}_3\text{O}_2$ : calcd.  $(\text{M}+\text{H})^+$ : 268.1081, found: 268.1074

### 3-Ethyl 6-methyl [1,2,4]triazolo[4,3-*a*]pyridine-3,6-dicarboxylate (3u)

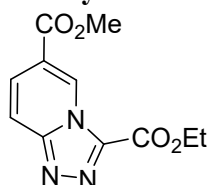

White solid; yield 52% (13 mg);  $R_f$  0.50 (60% EtOAc/hexane); Mp 147-148 °C;  $^1\text{H}$  NMR (500 MHz,  $\text{CDCl}_3$ )  $\delta$  9.85 (s, 1H), 8.03 (dd,  $J = 9.5$  Hz, 1.5 Hz, 1H), 7.96 (dd,  $J = 9.5$  Hz, 0.9 Hz, 1H), 4.61 (q,  $J = 7.1$  Hz, 2H), 4.01 (s, 3H), 1.53 (t,  $J = 7.2$  Hz, 3H);  $^{13}\text{C}$  NMR (125 MHz,  $\text{CDCl}_3$ )  $\delta$  164.06, 158.12, 151.42, 138.65, 129.82, 128.88, 120.27, 116.08, 62.76, 52.97, 14.24; HRMS for  $\text{C}_{11}\text{H}_{11}\text{N}_3\text{O}_4$ : calcd.  $(\text{M}+\text{H})^+$ : 250.0822, found: 250.0825

### 3-Ethyl 7-methyl [1,2,4]triazolo[4,3-*a*]pyridine-3,7-dicarboxylate (3v)

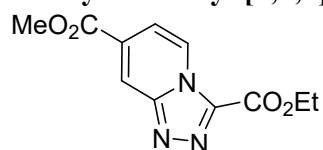

White solid; yield 48% (12 mg);  $R_f$  0.50 (60% EtOAc/hexane); Mp 128-129 °C;  $^1\text{H}$  NMR (400 MHz,  $\text{CDCl}_3$ )  $\delta$  9.20 (dd,  $J = 7.2$  Hz, 0.8 Hz, 1H), 8.64 (s, 1H), 7.68 (dd,  $J = 7.2$  Hz, 1.3 Hz, 1H), 4.61 (q,  $J = 7.1$  Hz, 2H), 4.03 (s, 3H) 1.53 (t,  $J = 7.2$  Hz, 3H);  $^{13}\text{C}$  NMR (125 MHz,  $\text{CDCl}_3$ )  $\delta$  164.18, 158.21, 151.05, 138.41, 130.91, 125.79, 119.03, 115.07, 62.70, 53.18, 14.26; HRMS for  $\text{C}_{11}\text{H}_{11}\text{N}_3\text{O}_4$ : calcd.  $(\text{M}+\text{H})^+$ : 250.0822, found: 250.0823

### Benzyl [1,2,4]triazolo[3,4-*a*]isoquinoline-3-carboxylate (3w)

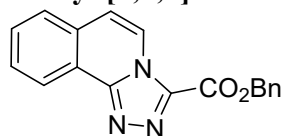

White solid; yield 69% (21 mg);  $R_f$  0.50 (40% EtOAc/hexane); Mp 158-159 °C;  $^1\text{H NMR}$  (400 MHz,  $\text{CDCl}_3$ )  $\delta$  8.85 (d,  $J = 7.4$  Hz, 2H), 7.79-7.82 (m, 1H), 7.73-7.77 (m, 2H), 7.54-7.56 (m, 2H), 7.34-7.42 (m, 3H), 7.28 (d,  $J = 7.4$  Hz, 1H), 5.56 (s, 2H);  $^{13}\text{C NMR}$  (125 MHz,  $\text{CDCl}_3$ )  $\delta$  158.32, 150.31, 139.28, 134.94, 131.01, 130.22, 129.48, 128.73, 128.71, 127.13, 124.64, 121.68, 120.91, 116.97, 67.84; **HRMS** for  $\text{C}_{18}\text{H}_{13}\text{N}_3\text{O}_2$ : calcd.  $(\text{M}+\text{H})^+$ : 304.1081, found: 304.1089

**Benzyl 9-methoxy-[1,2,4]triazolo[3,4-*a*]isoquinoline-3-carboxylate (3x)**

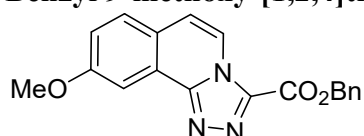

White solid; yield 66% (22 mg);  $R_f$  0.50 (60% EtOAc/hexane); Mp 163-164 °C;  $^1\text{H NMR}$  (500 MHz,  $\text{CDCl}_3$ )  $\delta$  8.76 (d,  $J = 7.3$  Hz, 1H), 8.21 (d,  $J = 2.4$  Hz, 1H), 7.71 (d,  $J = 8.8$  Hz, 1H), 7.55 (d,  $J = 7.1$  Hz, 2H), 7.34-7.42 (m, 4H), 7.23 (d,  $J = 7.3$  Hz, 1H), 5.56 (s, 2H), 4.02 (s, 3H);  $^{13}\text{C NMR}$  (125 MHz,  $\text{CDCl}_3$ )  $\delta$  160.45, 159.03, 158.32, 150.21, 139.24, 134.97, 128.79, 128.73, 128.72, 124.37, 122.32, 121.87, 119.45, 116.72, 104.69, 67.82, 56.02; **HRMS** for  $\text{C}_{19}\text{H}_{15}\text{N}_3\text{O}_3$ : calcd.  $(\text{M}+\text{H})^+$ : 334.1186, found: 334.1196

**Benzyl 7-chloro-[1,2,4]triazolo[3,4-*a*]isoquinoline-3-carboxylate (3y)**

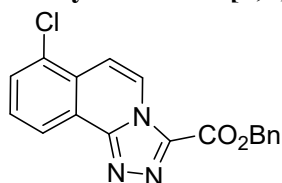

White solid; yield 50% (17 mg);  $R_f$  0.50 (40% EtOAc/hexane); Mp 145-146 °C;  $^1\text{H NMR}$  (500 MHz,  $\text{CDCl}_3$ )  $\delta$  8.94 (d,  $J = 7.6$  Hz, 1H), 8.80 (d,  $J = 7.9$  Hz, 1H), 7.82 (d,  $J = 7.5$  Hz, 1H), 7.72 (d,  $J = 7.6$  Hz, 1H), 7.68 (t,  $J = 8.0$  Hz, 1H), 7.56 (d,  $J = 7.0$  Hz, 2H), 7.35-7.42 (m, 3H), 5.57 (s, 2H);  $^{13}\text{C NMR}$  (125 MHz,  $\text{CDCl}_3$ )  $\delta$  158.17, 149.78, 139.44, 134.79, 131.94, 131.30, 129.85, 128.79, 128.77, 128.74, 128.13, 123.41, 122.66, 122.43, 113.15, 68.02; **HRMS** for  $\text{C}_{18}\text{H}_{12}\text{ClN}_3\text{O}_2$ : calcd.  $(\text{M}+\text{H})^+$ : 338.0691, found: 338.0693

**Benzyl 7-(4-fluorophenyl)-[1,2,4]triazolo[3,4-*a*]isoquinoline-3-carboxylate (3z)**

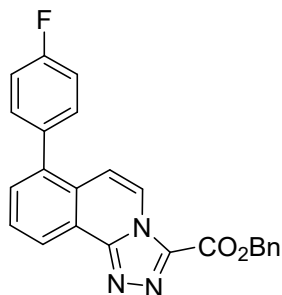

White solid; yield 55% (22 mg);  $R_f$  0.50 (50% EtOAc/hexane); Mp 225-226 °C;  $^1\text{H NMR}$  (500 MHz,  $\text{CDCl}_3$ )  $\delta$  8.90 (d,  $J = 8.0$  Hz, 1H), 8.78 (d,  $J = 7.7$  Hz, 1H), 7.79 (t,  $J = 7.8$  Hz, 1H), 7.68 (d,  $J = 7.3$  Hz, 1H), 7.54 (d,  $J = 7.2$  Hz, 2H), 7.34-7.43 (m, 5H), 7.30 (d,  $J = 7.7$

Hz, 1H), 7.23 (t,  $J = 8.6$  Hz, 2H), 5.55 (s, 2H);  $^{13}\text{C}$  NMR (125 MHz,  $\text{CDCl}_3$ )  $\delta$  162.71 (d,  $J_{\text{C-F}} = 246.1$  Hz), 158.24, 150.47, 139.29, 134.98 (d,  $J_{\text{C-F}} = 3.5$  Hz), 134.88, 132.05, 131.49 (d,  $J_{\text{C-F}} = 8.0$  Hz), 129.04, 128.74, 128.73, 128.23, 124.08, 121.63, 121.43, 115.77 (d,  $J_{\text{C-F}} = 21.4$  Hz), 114.65, 67.87;  $^{19}\text{F}$  NMR (376 MHz,  $\text{CDCl}_3$ )  $\delta$  -113.76 (s); HRMS for  $\text{C}_{24}\text{H}_{16}\text{FN}_3\text{O}_2$ : calcd. (M+H) $^+$ : 398.1299, found: 398.1294

### 3-Benzyl 6-ethyl 5-methyl-[1,2,4]triazolo[3,4-*a*]isoquinoline-3,6-dicarboxylate (3za)

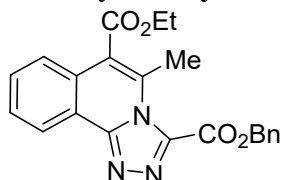

White solid; yield 59% (23 mg);  $R_f$  0.50 (35% EtOAc/hexane); Mp 103-104  $^\circ\text{C}$ ;  $^1\text{H}$  NMR (400 MHz,  $\text{CDCl}_3$ )  $\delta$  8.83-8.86 (m, 1H), 7.66-7.74 (m, 3H), 7.52 (br d,  $J = 6.7$  Hz, 2H), 7.36-7.42 (m, 3H), 5.54 (s, 2H), 4.54 (q,  $J = 7.1$  Hz, 2H), 2.62 (s, 3H), 1.46 (t,  $J = 7.1$  Hz, 3H);  $^{13}\text{C}$  NMR (100 MHz,  $\text{CDCl}_3$ )  $\delta$  166.63, 159.17, 149.76, 142.20, 134.58, 131.18, 130.51, 129.17, 128.83, 128.76, 128.69, 127.89, 124.74, 124.40, 121.62, 119.81, 68.71, 62.43, 18.40, 14.23; HRMS for  $\text{C}_{22}\text{H}_{19}\text{N}_3\text{O}_4$ : calcd. (M+H) $^+$ : 390.1448, found: 390.1452

### Benzyl 6-bromo -[1,2,4]triazolo[3,4-*a*]isoquinoline-3-carboxylate (3zb)

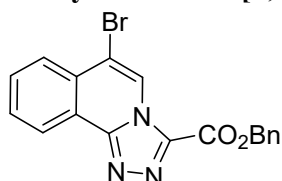

Yellow solid; yield 52% (20 mg);  $R_f$  0.50 (40% EtOAc/hexane); Mp 202-203  $^\circ\text{C}$ ;  $^1\text{H}$  NMR (500 MHz,  $\text{CDCl}_3$ )  $\delta$  9.19 (s, 1H), 8.87 (d,  $J = 7.6$  Hz, 1H), 8.15 (d,  $J = 7.9$  Hz, 1H), 7.80-7.87 (m, 2H), 7.55 (d,  $J = 7.1$  Hz, 2H), 7.34-7.41 (m, 3H), 5.56 (s, 2H);  $^{13}\text{C}$  NMR (125 MHz,  $\text{CDCl}_3$ )  $\delta$  158.13, 149.58, 138.73, 134.77, 131.77, 130.42, 129.09, 128.81, 128.77, 128.74, 127.19, 124.87, 122.51, 120.59, 113.59, 68.11; HRMS for  $\text{C}_{18}\text{H}_{12}\text{BrN}_3\text{O}_2$ : calcd. (M+H) $^+$ : 382.0186, found: 382.0181

### Benzyl [1,2,4]triazolo[4,3-*f*]phenanthridine-3-carboxylate (3zc)

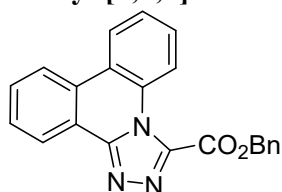

White solid; 48% (17 mg);  $R_f$  0.50 (50% EtOAc/hexane); Mp 190-191  $^\circ\text{C}$ ;  $^1\text{H}$  NMR (500 MHz,  $\text{CDCl}_3$ )  $\delta$  8.82 (d,  $J = 7.6$  Hz, 1H), 8.41 (d,  $J = 7.8$  Hz, 1H), 8.34 (t,  $J = 8.4$  Hz, 2H), 7.66-7.77 (m, 2H), 7.48-7.57 (m, 4H), 7.37-7.43 (m, 3H), 5.61 (s, 2H);  $^{13}\text{C}$  NMR (125 MHz,  $\text{CDCl}_3$ )  $\delta$  159.87, 150.04, 142.88, 134.72, 131.22, 129.97, 129.21, 129.04, 128.98, 128.80,



128.78, 127.25, 125.56, 124.13, 123.07, 122.41, 120.43, 119.49, 68.60; **HRMS** for  $C_{22}H_{15}N_3O_2$ : calcd. (M+H)<sup>+</sup>: 354.1237, found: 354.1242

**Dimethyl [1,2,4]triazolo[4,3-f]phenanthridin-3-ylphosphonate (3zd)**

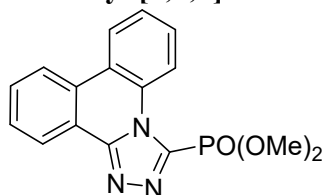

Colorless liquid; yield 34% (11 mg);  $R_f$  0.50 (80% EtOAc/hexane); **<sup>1</sup>H NMR** (500 MHz,  $CDCl_3$ )  $\delta$  9.02 (d,  $J = 8.4$  Hz, 1H), 8.87 (d,  $J = 7.7$  Hz, 1H), 8.51 (d,  $J = 8.0$  Hz, 1H), 8.42 (d,  $J = 8.2$  Hz, 1H), 7.81 (t,  $J = 7.2$  Hz, 1H), 7.72-7.76 (m, 2H), 7.66 (t,  $J = 7.6$  Hz, 1H), 4.07 (d,  $^3J_{H-P} = 11.5$  Hz, 6H); **<sup>13</sup>C NMR** (100 MHz,  $CDCl_3$ )  $\delta$  150.62, 131.31, 130.30, 129.76, 129.22, 129.07, 127.29, 125.65, 124.11, 122.89, 122.49, 120.43, 119.75, 55.09 (d,  $^2J_{C-P} = 6.7$  Hz); **<sup>31</sup>P NMR** (161.9 MHz,  $DMSO-d_6$ )  $\delta$  0.50; **HRMS** for  $C_{16}H_{14}N_3O_3P$ : calcd. (M+H)<sup>+</sup>: 328.0846, found: 328.0847

**[1,2,4]triazolo[3,4-a]isoquinoline (4)**

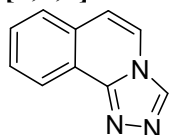

White solid; yield 75% (19 mg);  $R_f$  0.50 (EtOAc); Mp 95-96 °C; **<sup>1</sup>H NMR** (400 MHz,  $CDCl_3$ )  $\delta$  8.80 (s, 1H), 8.75 (d,  $J = 7.1$  Hz, 1H), 7.90 (d,  $J = 7.2$  Hz, 1H), 7.68-7.76 (m, 3H), 7.11 (d,  $J = 7.2$  Hz, 1H); **<sup>13</sup>C NMR** (100 MHz,  $CDCl_3$ )  $\delta$  148.23, 137.10, 130.22, 130.02, 129.30, 127.26, 124.16, 121.44, 119.78, 115.64; **HRMS** for  $C_{10}H_7N_3$ : calcd. (M+H)<sup>+</sup>: 170.0713, found: 170.0707.

**[1,2,4]triazolo[3,4-a]isoquinolin-3-ylmethanol (5)**

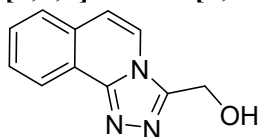

White solid; yield 60% (18 mg);  $R_f$  0.50 (5% MeOH/DCM); Mp 181-182 °C; **<sup>1</sup>H NMR** (400 MHz,  $DMSO-d_6$ )  $\delta$  8.53 (d,  $J = 4.3$  Hz, 1H), 8.28 (d,  $J = 7.0$  Hz, 1H), 7.95 (d,  $J = 4.2$  Hz, 1H), 7.75-7.77 (m, 2H), 7.35 (d,  $J = 7.1$  Hz, 1H), 5.80 (t,  $J = 5.5$  Hz, 1H), 5.00 (d,  $J = 4.9$  Hz, 2H); **<sup>13</sup>C NMR** (100 MHz,  $DMSO-d_6$ )  $\delta$  149.03, 148.42, 130.60, 130.22, 129.41, 128.04, 123.41, 121.72, 121.13, 114.53, 54.15; **HRMS** for  $C_{11}H_9N_3O$ : calcd. (M+H)<sup>+</sup>: 200.0818, found: 200.0821.

## N-benzyl-[1,2,4]triazolo[3,4-a]isoquinoline-3-carboxamide (6)

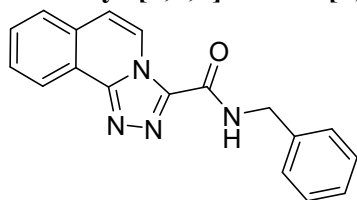

White solid; yield 52% (24 mg);  $R_f$  0.50 (30% EtOAc/hexane); Mp 234-235 °C;  $^1\text{H NMR}$  (500 MHz,  $\text{CDCl}_3$ )  $\delta$  9.06 (dd,  $J = 7.4$  Hz, 1.0 Hz, 1H), 8.77 (t,  $J = 4.6$  Hz, 1H), 7.95 (br s, 1H), 7.78-7.79 (m, 1H), 7.72-7.74 (m, 2H), 7.22-7.39 (m merged with solvent peak, 6H), 4.71 (d,  $J = 6.0$  Hz, 2H);  $^{13}\text{C NMR}$  (125 MHz,  $\text{CDCl}_3$ )  $\delta$  157.71, 150.28, 137.34, 130.79, 130.19, 129.26, 128.85, 127.88, 127.80, 127.19, 124.37, 122.29, 120.98, 116.45, 43.35; **HRMS** for  $\text{C}_{18}\text{H}_{14}\text{N}_4\text{O}$ : calcd.  $(\text{M}+\text{H})^+$ : 303.1240, found: 303.1244.

## 5. References

1. (a) R. Kuczniery, J. Dickhaut, H. Leinert and W. von der Saal, *Synth. Commun.*, 1999, **29**, 1617-1625; (b) S. A. Gamage, J. A. Spicer, G. W. Rewcastle, J. Milton, S. Sohal, W. Dangerfield, P. Mistry, N. Vicker, P. A. Charlton and W. A. Denny. *J. Med. Chem.* 2002, **45**, 740-743; (c) N. Jha, R. P. Singh, P. Saxena and M. Kapur *Org. Lett.* 2021, **23**, 8694–8698; (d) Y. Akira; S. Glen; H. Hisashi; T. Masaki; I. Kiyotaka; I. Masashi, WO 2001087845 A2, 2001; (e) Q. Wang and X. Li *Org. Chem. Front.* 2016, **3**, 1159-1162; (f) A. R. Choudhury and S. Mukherjee *Chem. Sci.*, 2016, **7**, 6940-6945.
2. L. Jiang, Z. Wang, M. Armstrong, M. G. Suero, *Angew. Chem., Int. Ed.* 2021, **60**, 6177-6184
3. C. L. Cioffi, B. Racz, A. Varadi, E. E. Freeman, M. P. Conlon, P. Chen, L. Zhu, D. B. Kitchen, K. D. Barnes, W. H. Martin, P. G. Pearson, G. Johnson, W. S. Blaner, and K. Petrukhin, *J. Med. Chem.*, 2019, **62**, 5470-5500
4. N. Xi, M. Li, J. Peng, X. Li, T. Zhang, H. Hu, W. Chen, C. Bai, D. Ke, P. Chen, WO 2019099311 A1, 2019
5. J. Li, X.-C. Lu, Y. Xu, J.-X. Wen, G.-Q. Hou, and L. Liu, *Org. Lett.*, 2020, **22**, 9621-9626
6. CrystalClear 2.1, Rigaku Corporation, Tokyo, Japan
7. G. M. Sheldrick, *Acta Crystallogr. Sect. A* 2008, **64**, 112-122

## 6. Copies of $^1\text{H}$ , $^{13}\text{C}$ , $^{19}\text{F}$ and $^{31}\text{P}$ NMR Spectra

NRLD-627

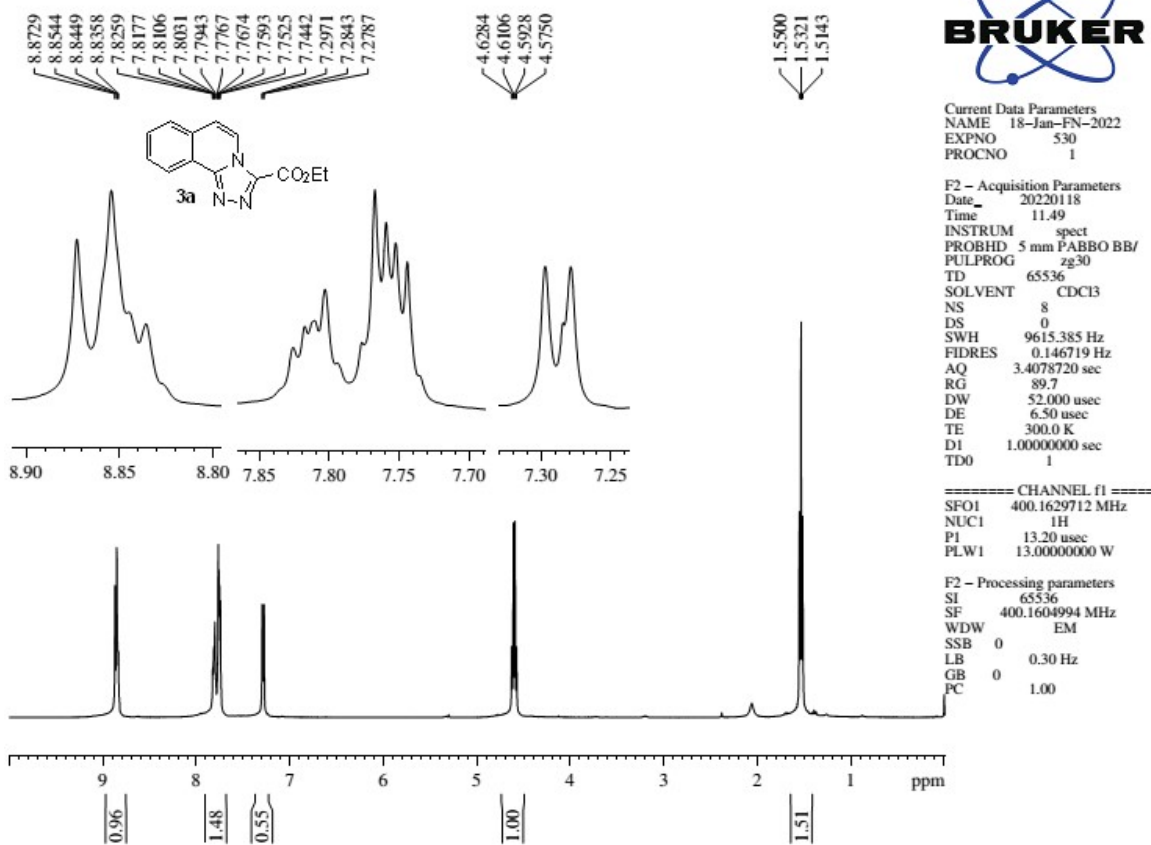

Figure S7:  $^1\text{H}$  NMR spectrum of **3a**

NRLD-627

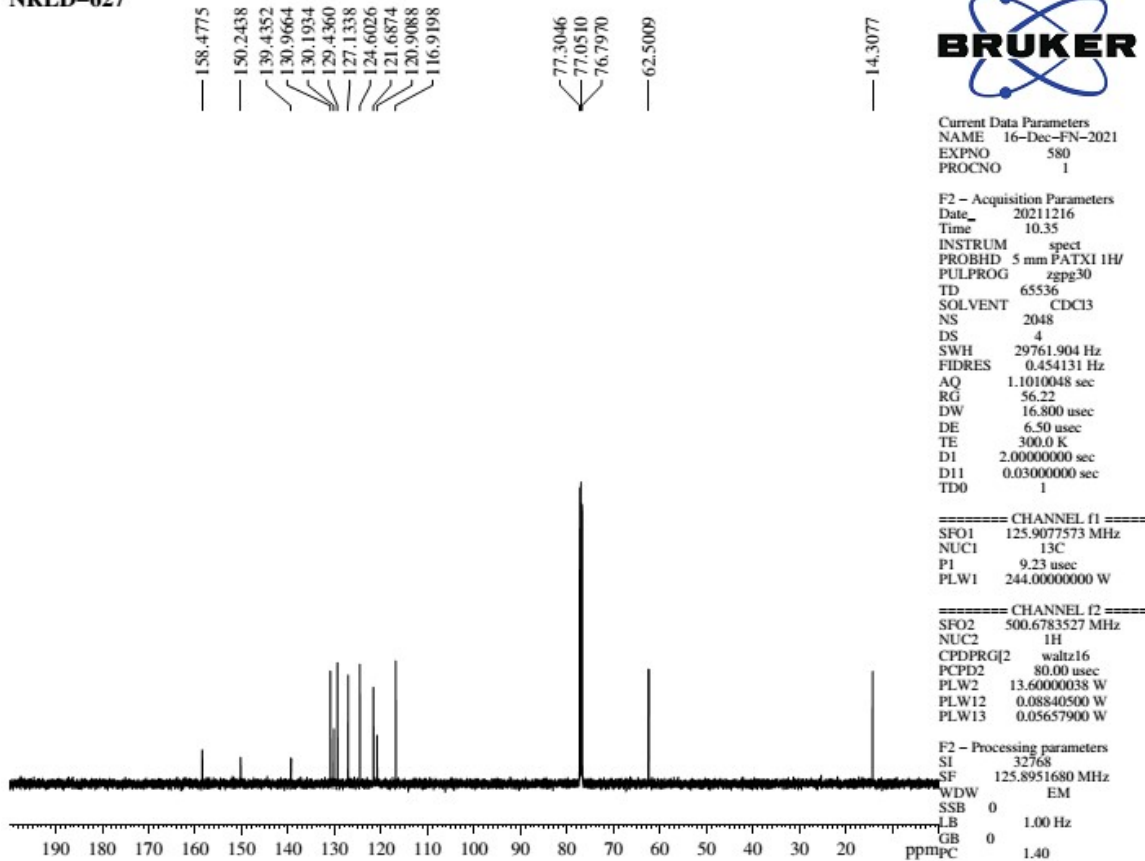

Figure S8:  $^{13}\text{C}$  NMR spectrum of **3a**

NRLD-653

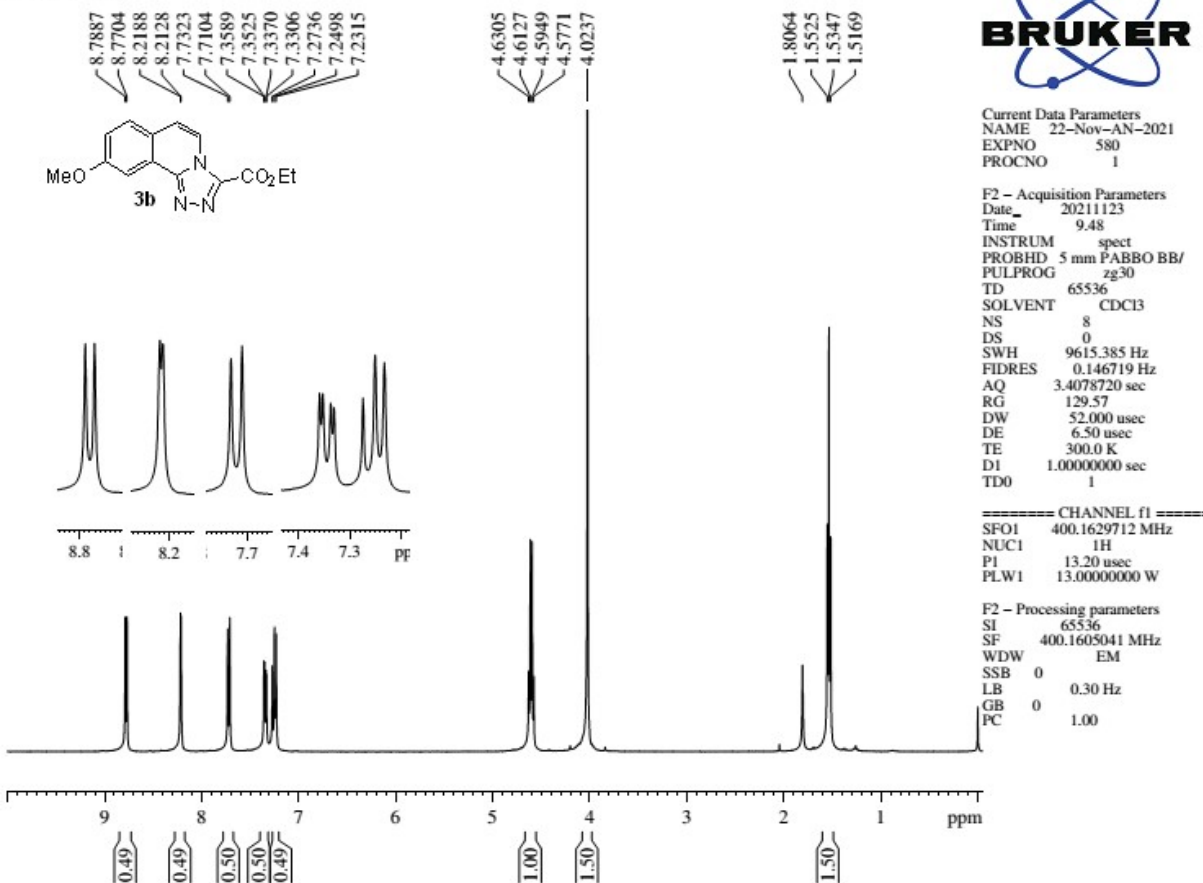

Figure S9: <sup>1</sup>H NMR spectrum of **3b**

NRLD-653

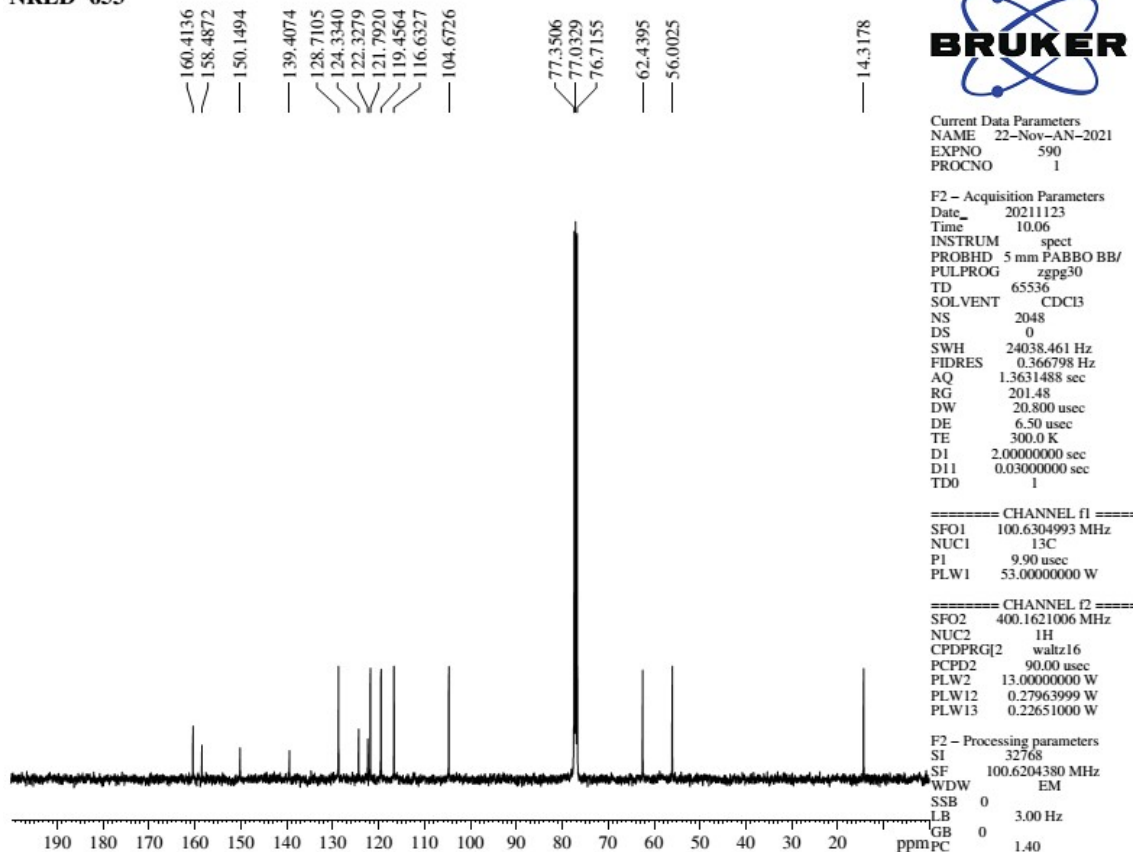

Figure S10: <sup>13</sup>C NMR spectrum of **3b**

NRLD-638

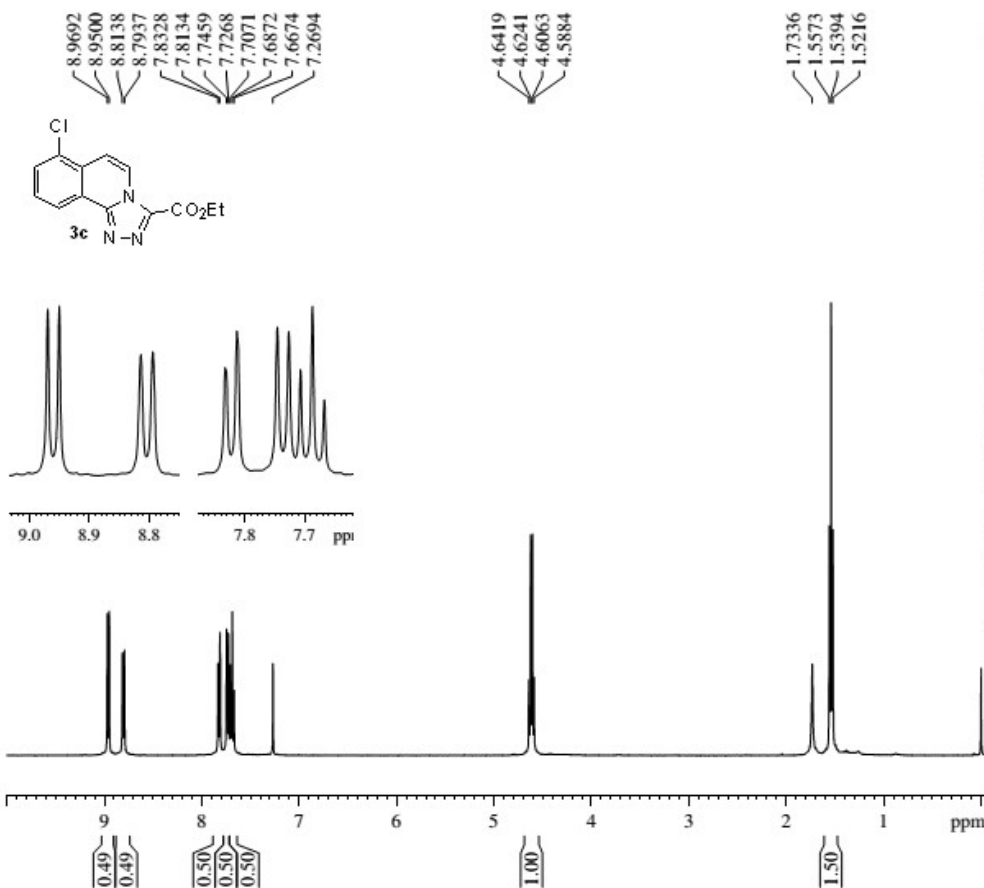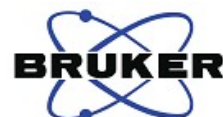

Current Data Parameters  
 NAME 28-Oct-AN-2021  
 EXPNO 510  
 PROCNO 1

F2 - Acquisition Parameters  
 Date\_ 20211029  
 Time 7.00  
 INSTRUM spect  
 PROBHD 5 mm PABBO BB/  
 PULPROG zg30  
 TD 65536  
 SOLVENT CDCl3  
 NS 8  
 DS 0  
 SWH 9615.385 Hz  
 FIDRES 0.146719 Hz  
 AQ 3.4078720 sec  
 RG 145.29  
 DW 52.000 usec  
 DE 6.50 usec  
 TE 300.0 K  
 D1 1.00000000 sec  
 TD0 1

==== CHANNEL f1 =====  
 SFO1 400.1629712 MHz  
 NUC1 1H  
 P1 13.20 usec  
 PLW1 13.00000000 W

F2 - Processing parameters  
 SI 65536  
 SF 400.1605057 MHz  
 WDW EM  
 SSB 0  
 LB 0.30 Hz  
 GB 0  
 PC 1.00

Figure S11: <sup>1</sup>H NMR spectrum of 3c

NRLD-638

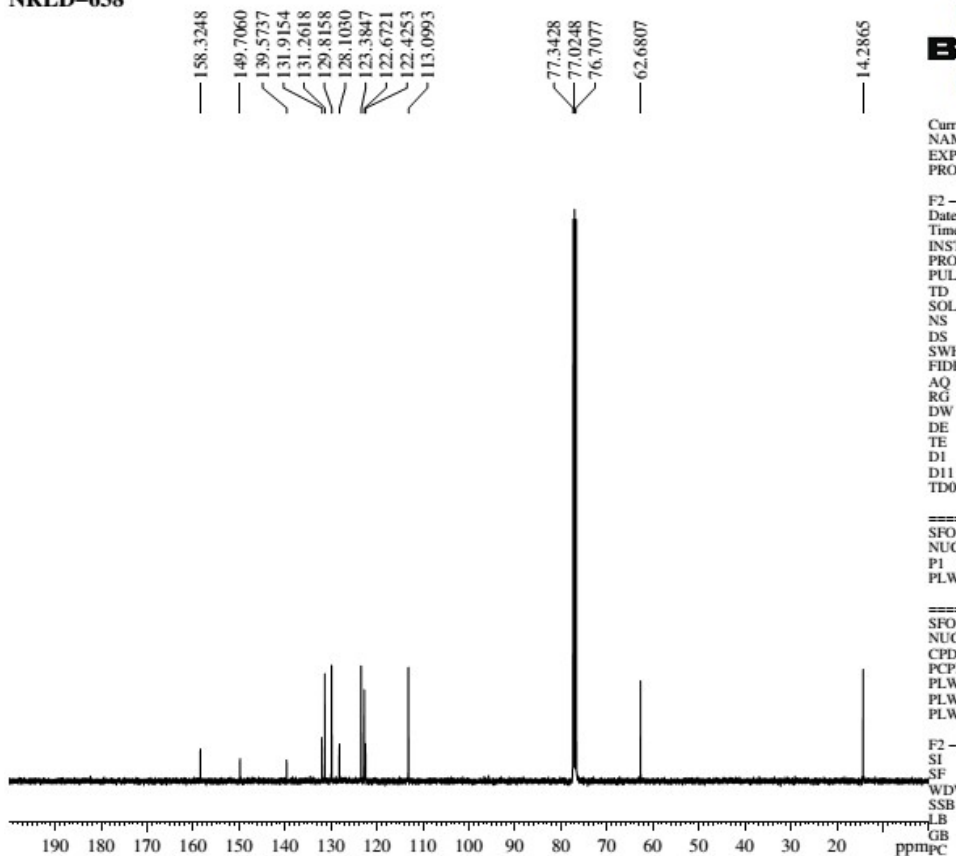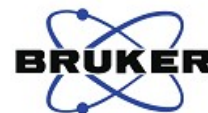

Current Data Parameters  
 NAME 28-Oct-AN-2021  
 EXPNO 520  
 PROCNO 1

F2 - Acquisition Parameters  
 Date\_ 20211029  
 Time 8.00  
 INSTRUM spect  
 PROBHD 5 mm PABBO BB/  
 PULPROG zgpg30  
 TD 65536  
 SOLVENT CDCl3  
 NS 2048  
 DS 0  
 SWH 24038.461 Hz  
 FIDRES 0.366798 Hz  
 AQ 1.3631488 sec  
 RG 201.48  
 DW 20.800 usec  
 DE 6.50 usec  
 TE 300.0 K  
 D1 2.00000000 sec  
 D11 0.03000000 sec  
 TD0 1

==== CHANNEL f1 =====  
 SFO1 100.6304993 MHz  
 NUC1 13C  
 P1 9.90 usec  
 PLW1 53.00000000 W

==== CHANNEL f2 =====  
 SFO2 400.1621006 MHz  
 NUC2 1H  
 CPDPRG2 waltz16  
 PCPD2 90.00 usec  
 PLW2 13.00000000 W  
 PLW12 0.27963999 W  
 PLW13 0.22651000 W

F2 - Processing parameters  
 SI 32768  
 SF 100.6204380 MHz  
 WDW EM  
 SSB 0  
 LB 1.00 Hz  
 GB 0  
 PC 1.40

Figure S12: <sup>13</sup>C NMR spectrum of 3c

NRPD-634

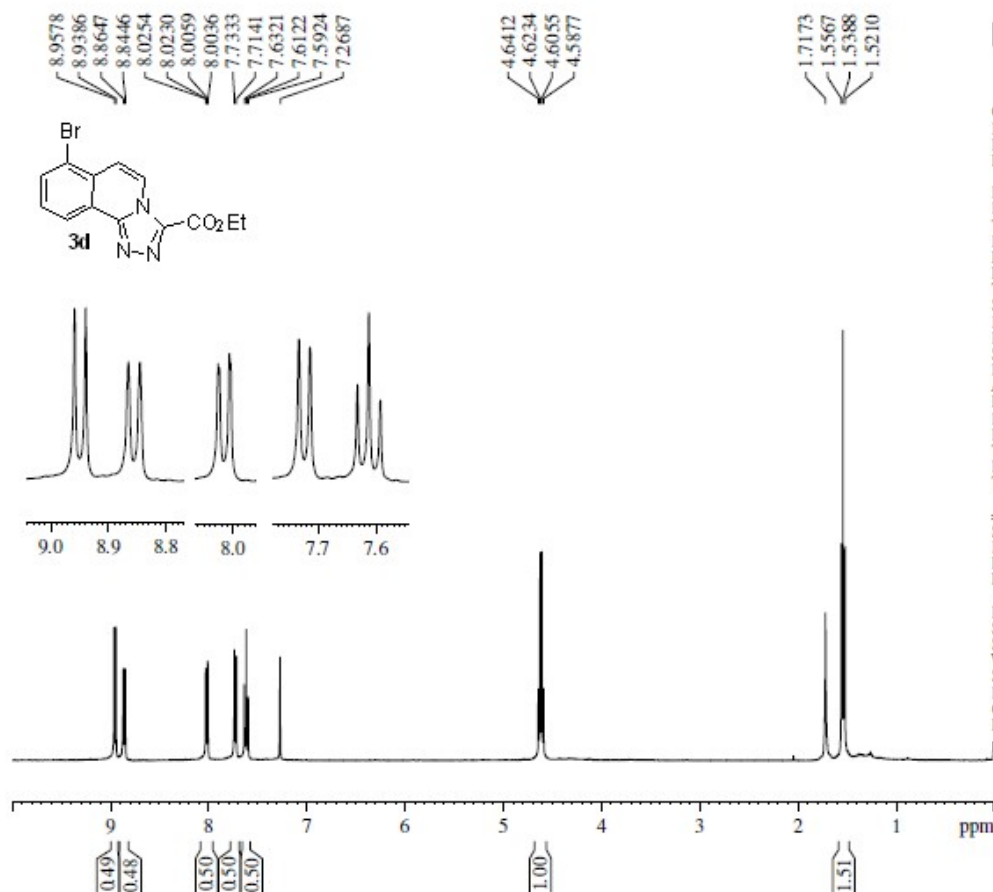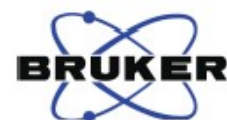

Current Data Parameters  
 NAME 25-Oct-FN-2021  
 EXPNO 480  
 PROCNO 1

F2 - Acquisition Parameters  
 Date\_ 20211025  
 Time 16.44  
 INSTRUM spect  
 PROBHD 5 mm PABBO BB/  
 PULPROG zg30  
 TD 65536  
 SOLVENT CDCl3  
 NS 8  
 DS 0  
 SWH 9615.385 Hz  
 FIDRES 0.146719 Hz  
 AQ 3.4078720 sec  
 RG 145.29  
 DW 52.000 usec  
 DE 6.50 usec  
 TE 300.0 K  
 D1 1.0000000 sec  
 TD0 1

==== CHANNEL f1 ====  
 SFO1 400.1629712 MHz  
 NUC1 1H  
 P1 13.20 usec  
 PLW1 13.00000000 W

F2 - Processing parameters  
 SI 65336  
 SF 400.1605061 MHz  
 WDW EM  
 SSB 0  
 LB 0.30 Hz  
 GB 0  
 PC 1.00

Figure S13: <sup>1</sup>H NMR spectrum of 3d

NRPD-634

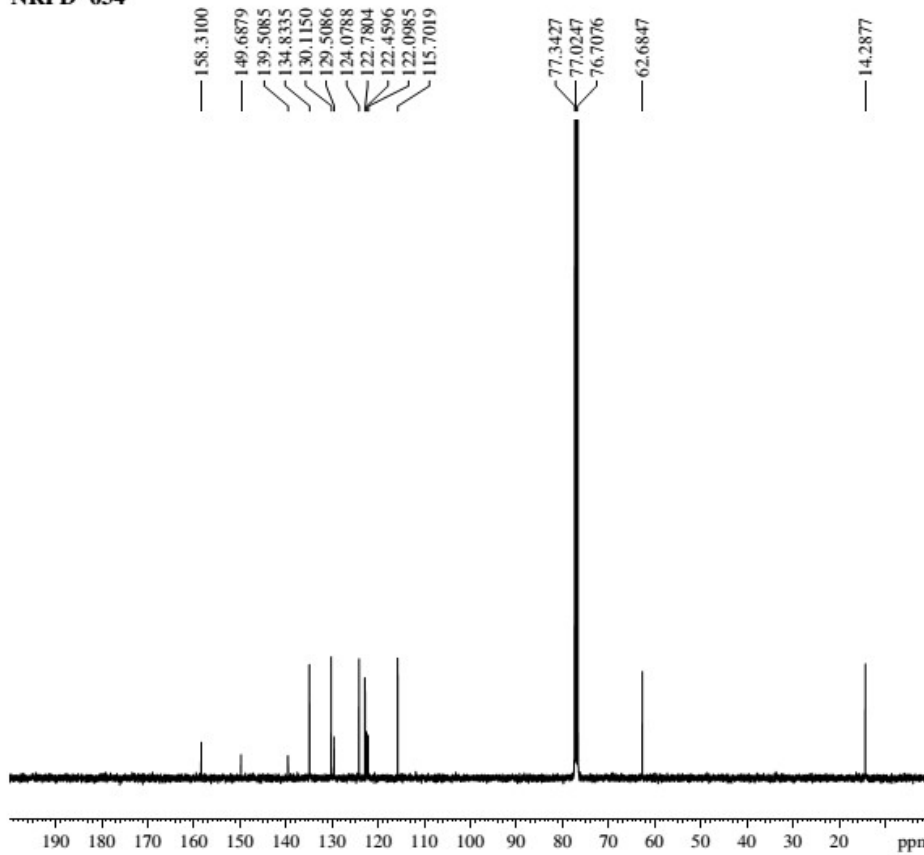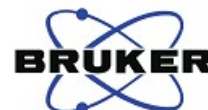

Current Data Parameters  
 NAME 25-Oct-FN-2021  
 EXPNO 490  
 PROCNO 1

F2 - Acquisition Parameters  
 Date\_ 20211025  
 Time 16.49  
 INSTRUM spect  
 PROBHD 5 mm PABBO BB/  
 PULPROG zgpg30  
 TD 65536  
 SOLVENT CDCl3  
 NS 2048  
 DS 0  
 SWH 24038.461 Hz  
 FIDRES 0.366798 Hz  
 AQ 1.3631488 sec  
 RG 201.48  
 DW 20.800 usec  
 DE 6.50 usec  
 TE 300.0 K  
 D1 2.0000000 sec  
 D11 0.03000000 sec  
 TD0 1

==== CHANNEL f1 ====  
 SFO1 100.6304993 MHz  
 NUC1 13C  
 P1 9.90 usec  
 PLW1 53.00000000 W

==== CHANNEL f2 ====  
 SFO2 400.1621006 MHz  
 NUC2 1H  
 CPDPRG2 waltz16  
 PCPD2 90.00 usec  
 PLW2 13.00000000 W  
 PLW12 0.27963999 W  
 PLW13 0.22651000 W

F2 - Processing parameters  
 SI 32768  
 SF 100.6204380 MHz  
 WDW EM  
 SSB 0  
 LB 1.00 Hz  
 GB 0  
 PC 1.40

Figure S14: <sup>13</sup>C NMR spectrum of 3d

NRLD-635

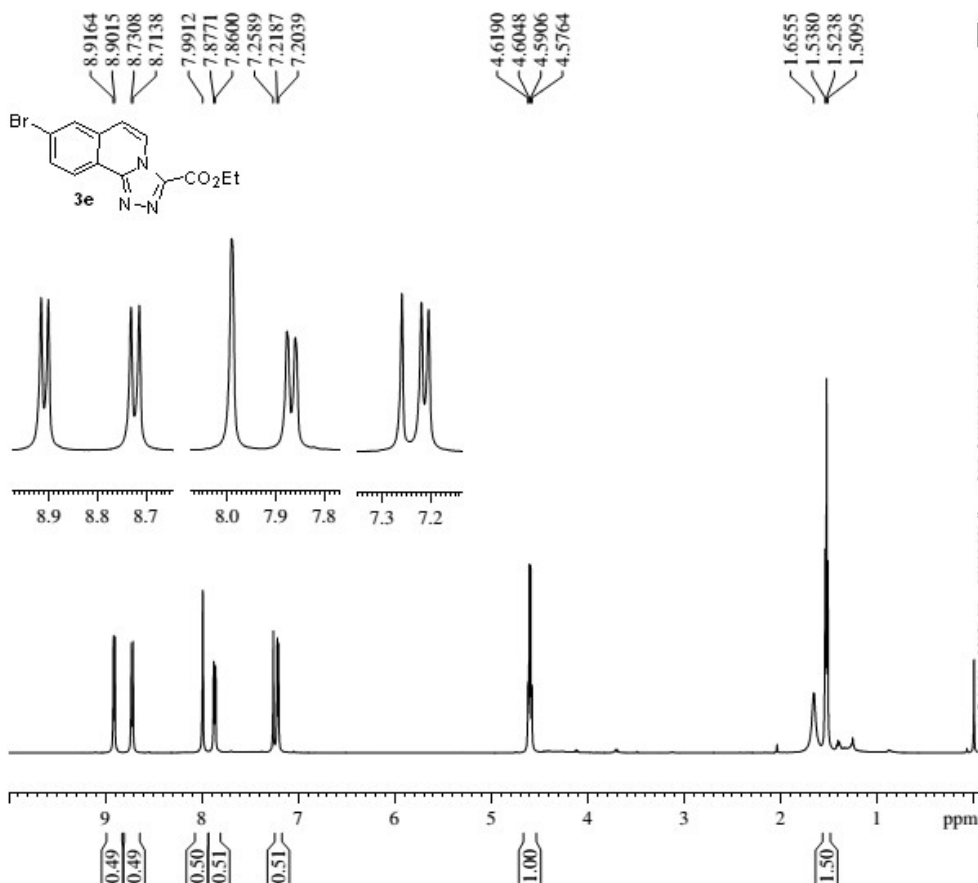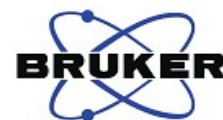

Current Data Parameters  
 NAME 26-Oct-AN-2021  
 EXPNO 450  
 PROCNO 1

F2 - Acquisition Parameters  
 Date\_ 20211026  
 Time 17.32  
 INSTRUM spect  
 PROBHD 5 mm PATXI 1H/  
 PULPROG zg30  
 TD 65536  
 SOLVENT CDCl3  
 NS 16  
 DS 2  
 SWH 10026.738 Hz  
 FIDRES 0.152996 Hz  
 AQ 3.2680619 sec  
 RG 201.78  
 DW 49.867 usec  
 DE 6.50 usec  
 TE 303.0 K  
 D1 1.00000000 sec  
 TD0 1

==== CHANNEL f1 =====  
 SFO1 500.6794419 MHz  
 NUC1 1H  
 P1 6.45 usec  
 PLW1 13.60000038 W

F2 - Processing parameters  
 SI 65536  
 SF 500.6763620 MHz  
 WDW EM  
 SSB 0  
 LB 0.30 Hz  
 GB 0  
 PC 1.00

Figure S15: <sup>1</sup>H NMR spectrum of 3e

NRLD-635

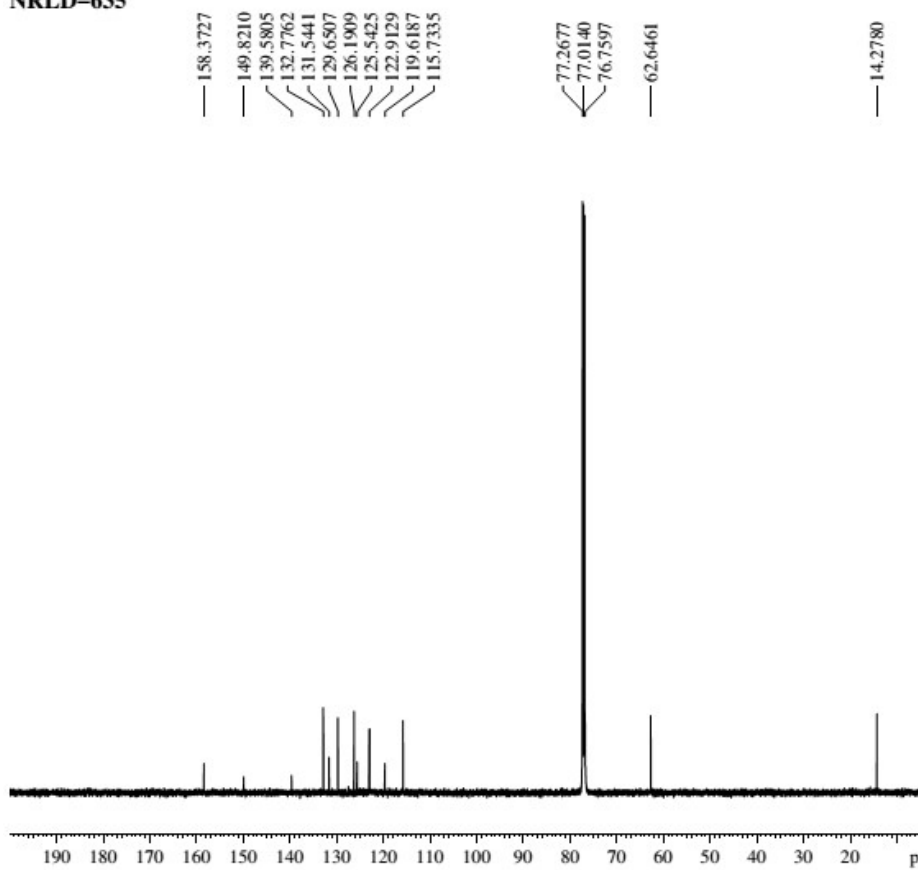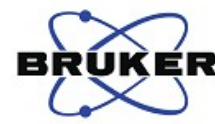

Current Data Parameters  
 NAME 26-Oct-AN-2021  
 EXPNO 460  
 PROCNO 1

F2 - Acquisition Parameters  
 Date\_ 20211026  
 Time 17.30  
 INSTRUM spect  
 PROBHD 5 mm PATXI 1H/  
 PULPROG zgpg30  
 TD 65536  
 SOLVENT CDCl3  
 NS 4096  
 DS 4  
 SWH 29761.904 Hz  
 FIDRES 0.454131 Hz  
 AQ 1.1010048 sec  
 RG 56.22  
 DW 16.800 usec  
 DE 6.50 usec  
 TE 303.0 K  
 D1 2.00000000 sec  
 D11 0.03000000 sec  
 TD0 1

==== CHANNEL f1 =====  
 SFO1 125.9077573 MHz  
 NUC1 13C  
 P1 9.23 usec  
 PLW1 244.00000000 W

==== CHANNEL f2 =====  
 SFO2 500.6783527 MHz  
 NUC2 1H  
 CPDPRG[2] waltz16  
 PCPD2 80.00 usec  
 PLW2 13.60000038 W  
 PLW12 0.08840500 W  
 PLW13 0.05657900 W

F2 - Processing parameters  
 SI 32768  
 SF 125.8951680 MHz  
 WDW EM  
 SSB 0  
 LB 1.00 Hz  
 GB 0  
 PC 1.40

Figure S16: <sup>13</sup>C NMR spectrum of 3e

NRLD-656

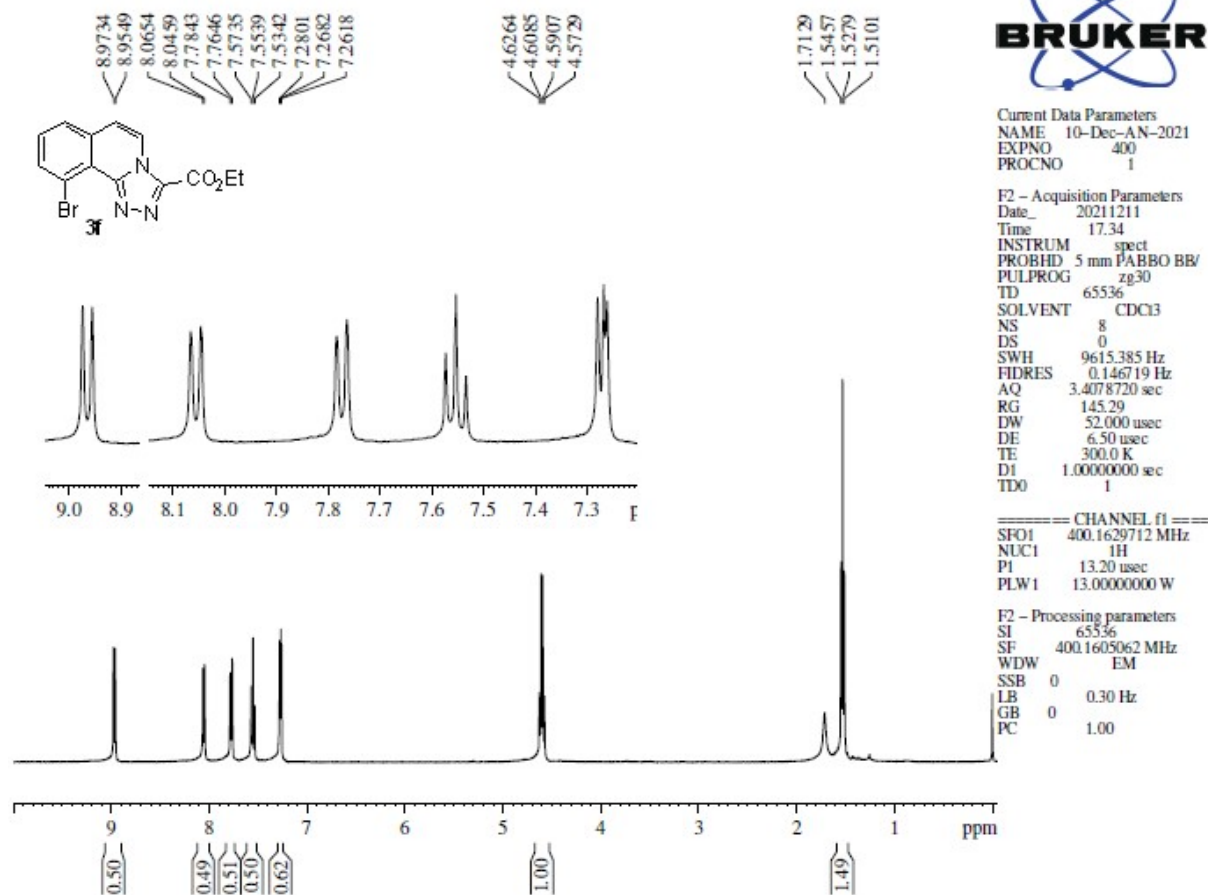

Figure S17: <sup>1</sup>H NMR spectrum of 3f

NRLD-656

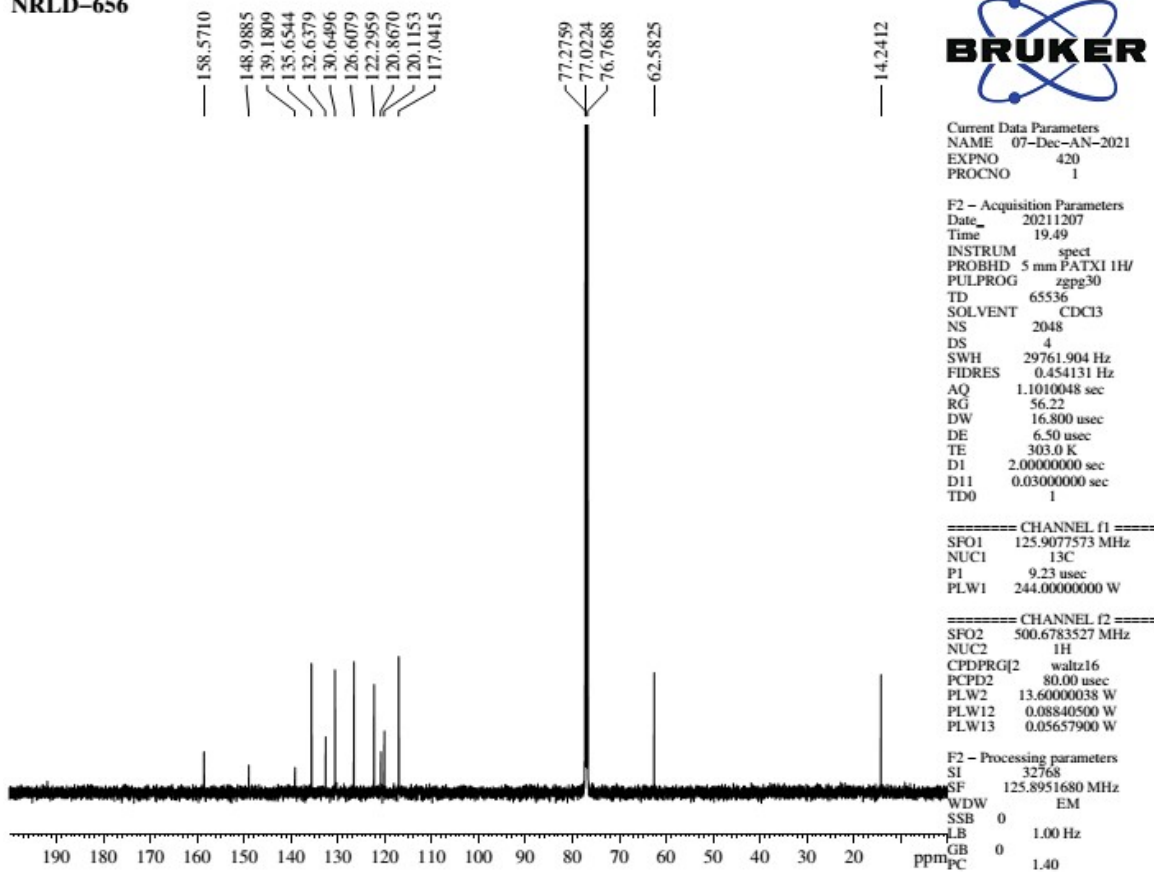

Figure S18: <sup>13</sup>C NMR spectrum of 3f



NRLD-639

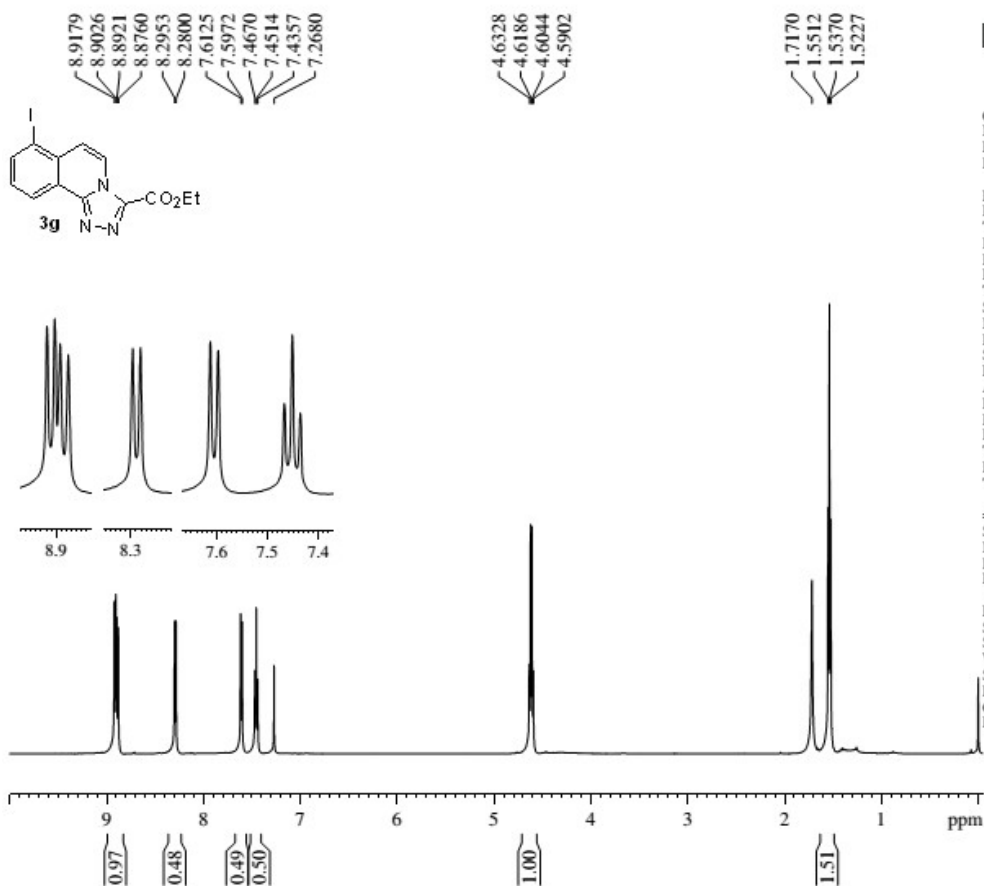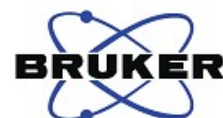

Current Data Parameters  
 NAME 01-Nov-FN-2021  
 EXPNO 540  
 PROCNO 1

F2 - Acquisition Parameters  
 Date\_ 20211101  
 Time 11.25  
 INSTRUM spect  
 PROBHD 5 mm PATXI 1H/  
 PULPROG zg30  
 TD 65536  
 SOLVENT CDCl3  
 NS 16  
 DS 2  
 SWH 10026.738 Hz  
 FIDRES 0.152996 Hz  
 AQ 3.2680619 sec  
 RG 201.78  
 DW 49.867 usec  
 DE 6.50 usec  
 TE 303.0 K  
 D1 1.00000000 sec  
 TD0 1

===== CHANNEL f1 =====  
 SFO1 500.6794419 MHz  
 NUC1 1H  
 P1 6.45 usec  
 PLW1 13.60000038 W

F2 - Processing parameters  
 SI 65536  
 SF 500.6763578 MHz  
 WDW EM  
 SSB 0  
 LB 0.30 Hz  
 GB 0  
 PC 1.00

Figure S19: <sup>1</sup>H NMR spectrum of **3g**

NRLD-639

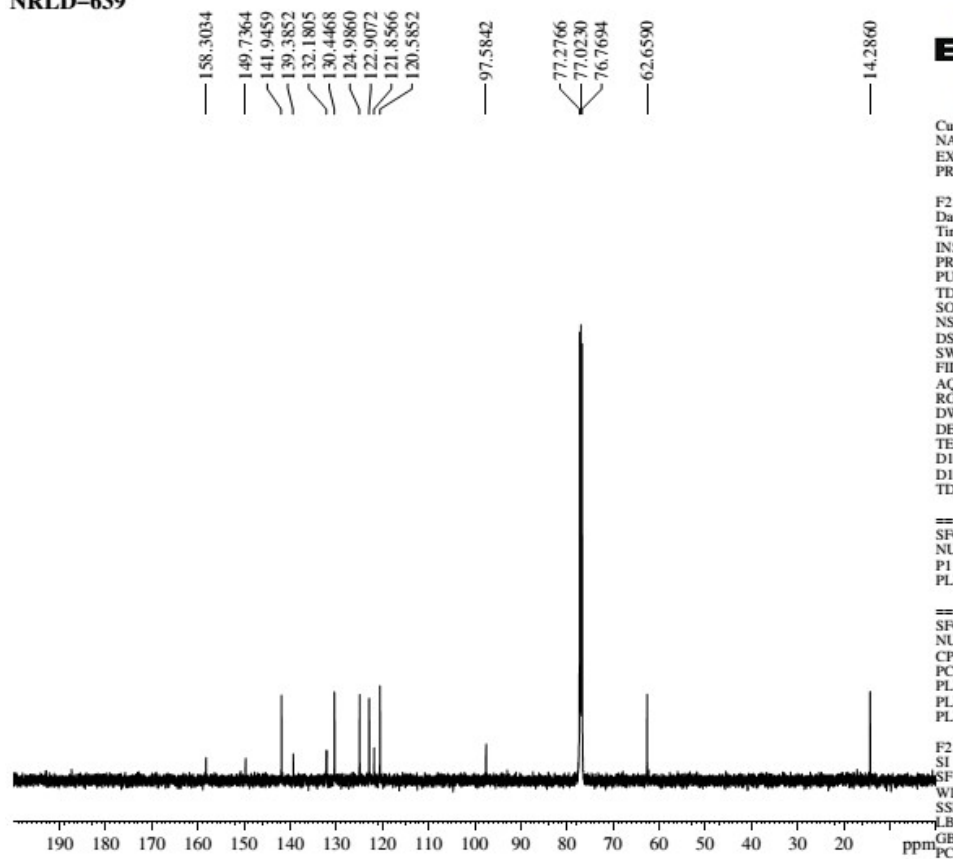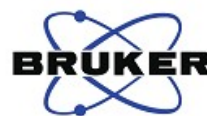

Current Data Parameters  
 NAME 01-Nov-FN-2021  
 EXPNO 550  
 PROCNO 1

F2 - Acquisition Parameters  
 Date\_ 20211101  
 Time 10.44  
 INSTRUM spect  
 PROBHD 5 mm PATXI 1H/  
 PULPROG zgpg30  
 TD 65536  
 SOLVENT CDCl3  
 NS 1500  
 DS 4  
 SWH 29761.904 Hz  
 FIDRES 0.454131 Hz  
 AQ 1.1010048 sec  
 RG 56.22  
 DW 16.800 usec  
 DE 6.50 usec  
 TE 303.0 K  
 D1 2.00000000 sec  
 D11 0.03000000 sec  
 TD0 1

===== CHANNEL f1 =====  
 SFO1 125.9077573 MHz  
 NUC1 13C  
 P1 9.23 usec  
 PLW1 244.00000000 W

===== CHANNEL f2 =====  
 SFO2 500.6783527 MHz  
 NUC2 1H  
 CPDPRG2 waltz16  
 PCPD2 80.00 usec  
 PLW2 13.60000038 W  
 PLW12 0.08840500 W  
 PLW13 0.05657900 W

F2 - Processing parameters  
 SI 32768  
 SF 125.8951680 MHz  
 WDW EM  
 SSB 0  
 LB 1.00 Hz  
 GB 0  
 PC 1.40

Figure S20: <sup>13</sup>C NMR spectrum of **3g**

NRLD-633

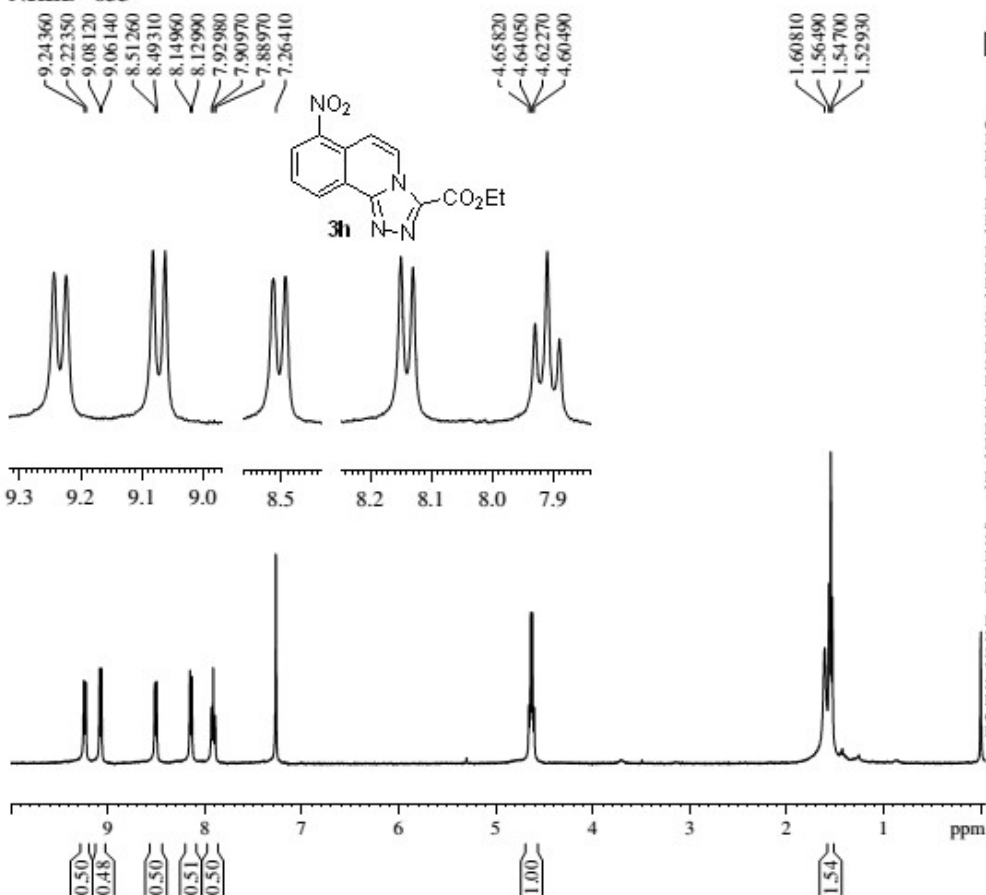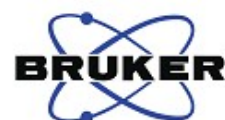

Current Data Parameters  
 NAME 29-Dec-AN-2021  
 EXPNO 310  
 PROCNO 1

F2 - Acquisition Parameters  
 Date\_ 20211229  
 Time 21.22  
 INSTRUM spect  
 PROBHD 5 mm PABBO BB/  
 PULPROG zg30  
 TD 65536  
 SOLVENT CDCl3  
 NS 8  
 DS 0  
 SWH 9615.385 Hz  
 FIDRES 0.146719 Hz  
 AQ 3.4078720 sec  
 RG 179.93  
 DW 52.000 usec  
 DE 6.50 usec  
 TE 300.0 K  
 D1 1.00000000 sec  
 TD0 1

==== CHANNEL f1 =====  
 SFO1 400.1629712 MHz  
 NUC1 1H  
 P1 13.20 usec  
 PLW1 13.00000000 W

F2 - Processing parameters  
 SI 65536  
 SF 400.1605079 MHz  
 WDW EM  
 SSB 0  
 LB 0.30 Hz  
 GB 0  
 PC 1.00

Figure S21: <sup>1</sup>H NMR spectrum of 3h

NRLD-633

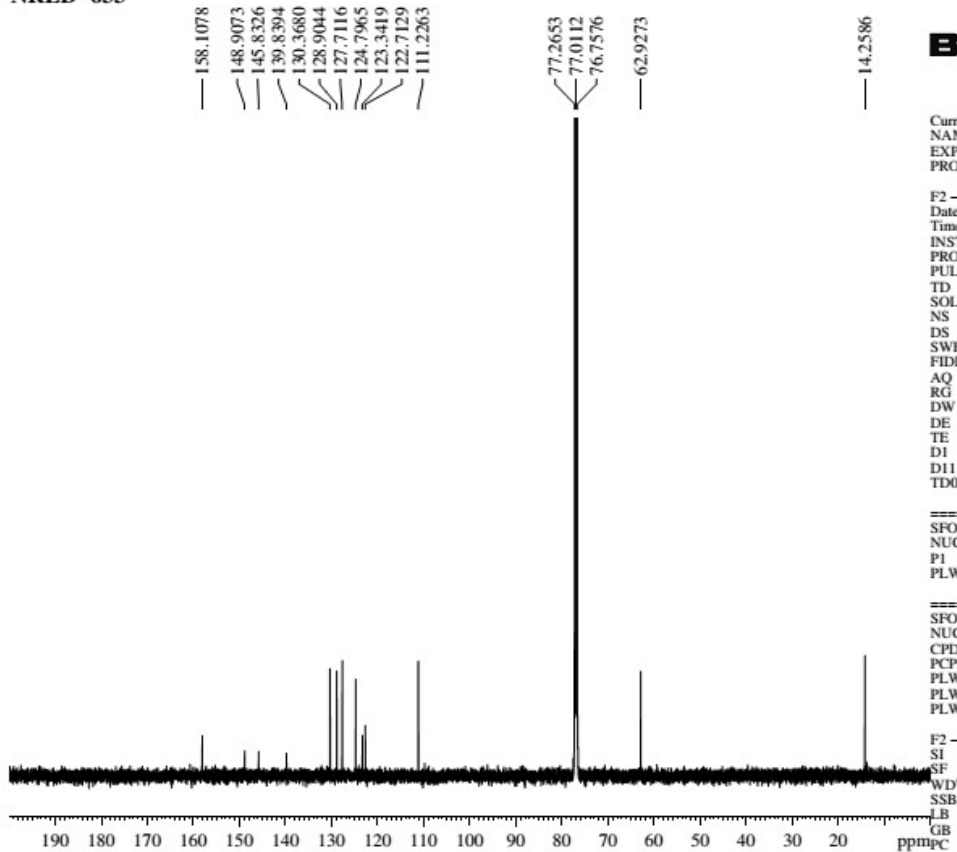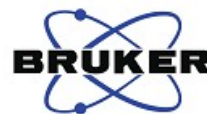

Current Data Parameters  
 NAME 10-Nov-FN-2021  
 EXPNO 500  
 PROCNO 1

F2 - Acquisition Parameters  
 Date\_ 20211111  
 Time 0.47  
 INSTRUM spect  
 PROBHD 5 mm PATXI 1H/  
 PULPROG zgpg30  
 TD 65536  
 SOLVENT CDCl3  
 NS 4096  
 DS 4  
 SWH 29761.904 Hz  
 FIDRES 0.454131 Hz  
 AQ 1.1010048 sec  
 RG 56.22  
 DW 16.800 usec  
 DE 6.50 usec  
 TE 303.0 K  
 D1 2.0000000 sec  
 D11 0.03000000 sec  
 TD0 1

==== CHANNEL f1 =====  
 SFO1 125.9077573 MHz  
 NUC1 13C  
 P1 9.23 usec  
 PLW1 244.00000000 W

==== CHANNEL f2 =====  
 SFO2 500.6783527 MHz  
 NUC2 1H  
 CPDPRG2 waltz16  
 PCPD2 80.00 usec  
 PLW2 13.60000038 W  
 PLW12 0.08840500 W  
 PLW13 0.05657900 W

F2 - Processing parameters  
 SI 32768  
 SF 125.8951680 MHz  
 WDW EM  
 SSB 0  
 LB 1.00 Hz  
 GB 0  
 PC 1.40

Figure S22: <sup>13</sup>C NMR spectrum of 3h

NRLD-649

10.3773  
9.1858  
9.1698  
9.0402  
9.0247  
8.7952  
8.7945  
8.7797  
8.2528  
8.2506  
8.2381  
8.2359  
7.9849  
7.9693  
7.9603  
7.9541  
7.2665

4.6446  
4.6303  
4.6160  
4.6018

1.5572  
1.5430  
1.5287

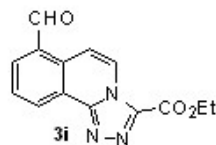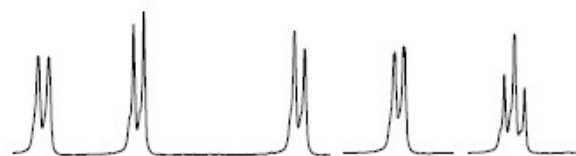

9.2 9.1 9.0 8.9 8.8 8.3 8.2 8.0 7.9

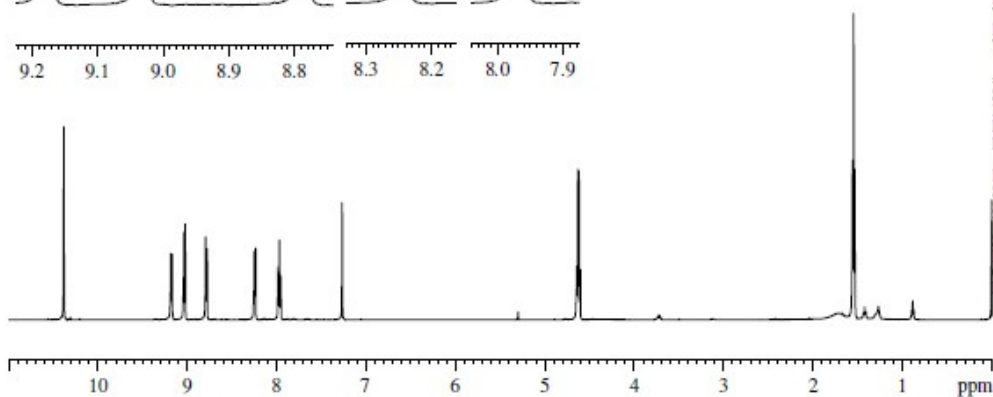

0.49 0.49 0.49 0.50 0.50 1.00 1.51

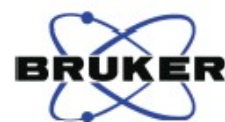

Current Data Parameters  
NAME 17-Nov-AN-2021  
EXPNO 530  
PROCNO 1

F2 - Acquisition Parameters  
Date\_ 20211117  
Time 21.24  
INSTRUM spect  
PROBHD 5 mm PATX1 1H/  
PULPROG zg30  
TD 65536  
SOLVENT CDCl3  
NS 16  
DS 2  
SWH 10026.738 Hz  
FIDRES 0.152996 Hz  
AQ 3.2680619 sec  
RG 201.78  
DW 49.867 usec  
DE 6.50 usec  
TE 303.0 K  
D1 1.00000000 sec  
TD0 1

==== CHANNEL f1 ====  
SFO1 500.6794419 MHz  
NUC1 1H  
P1 6.45 usec  
PLW1 13.60000038 W

F2 - Processing parameters  
SI 65536  
SF 500.6763582 MHz  
WDW EM  
SSB 0  
LB 0.30 Hz  
GB 0  
PC 1.00

Figure S23: <sup>1</sup>H NMR spectrum of 3i

NRLD-649

192.5923

158.2736  
149.4658  
139.6090  
138.7006  
130.8801  
130.4348  
128.9655  
128.5707  
124.3017  
122.1398  
112.8457

77.2686  
77.0150  
76.7613

62.7111

14.2824

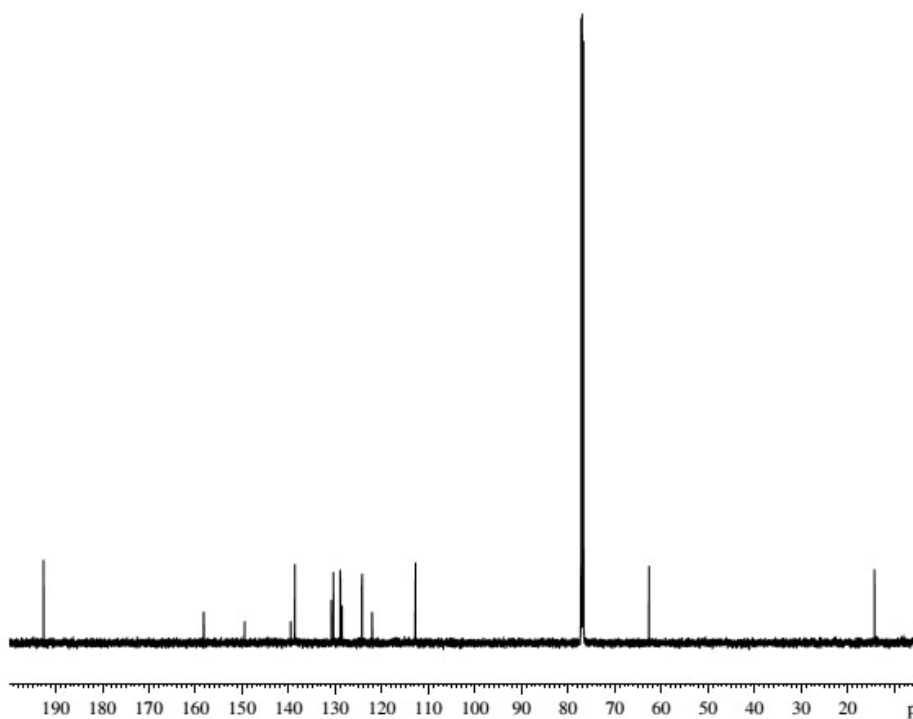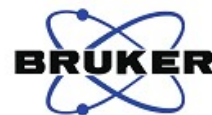

Current Data Parameters  
NAME 17-Nov-AN-2021  
EXPNO 520  
PROCNO 1

F2 - Acquisition Parameters  
Date\_ 20211117  
Time 21.21  
INSTRUM spect  
PROBHD 5 mm PATX1 1H/  
PULPROG zgpg30  
TD 65536  
SOLVENT CDCl3  
NS 2048  
DS 4  
SWH 29761.904 Hz  
FIDRES 0.454131 Hz  
AQ 1.1010048 sec  
RG 56.22  
DW 16.800 usec  
DE 6.50 usec  
TE 303.0 K  
D1 2.00000000 sec  
D11 0.03000000 sec  
TD0 1

==== CHANNEL f1 ====  
SFO1 125.9077573 MHz  
NUC1 13C  
P1 9.23 usec  
PLW1 244.00000000 W

==== CHANNEL f2 ====  
SFO2 500.6783527 MHz  
NUC2 1H  
CPDPRG2 waltz16  
PCPD2 80.00 usec  
PLW2 13.60000038 W  
PLW12 0.08840500 W  
PLW13 0.05657900 W

F2 - Processing parameters  
SI 32768  
SF 125.8951680 MHz  
WDW EM  
SSB 0  
LB 1.00 Hz  
GB 0  
PC 1.40

Figure S24: <sup>13</sup>C NMR spectrum of 3i

NRLD-91P

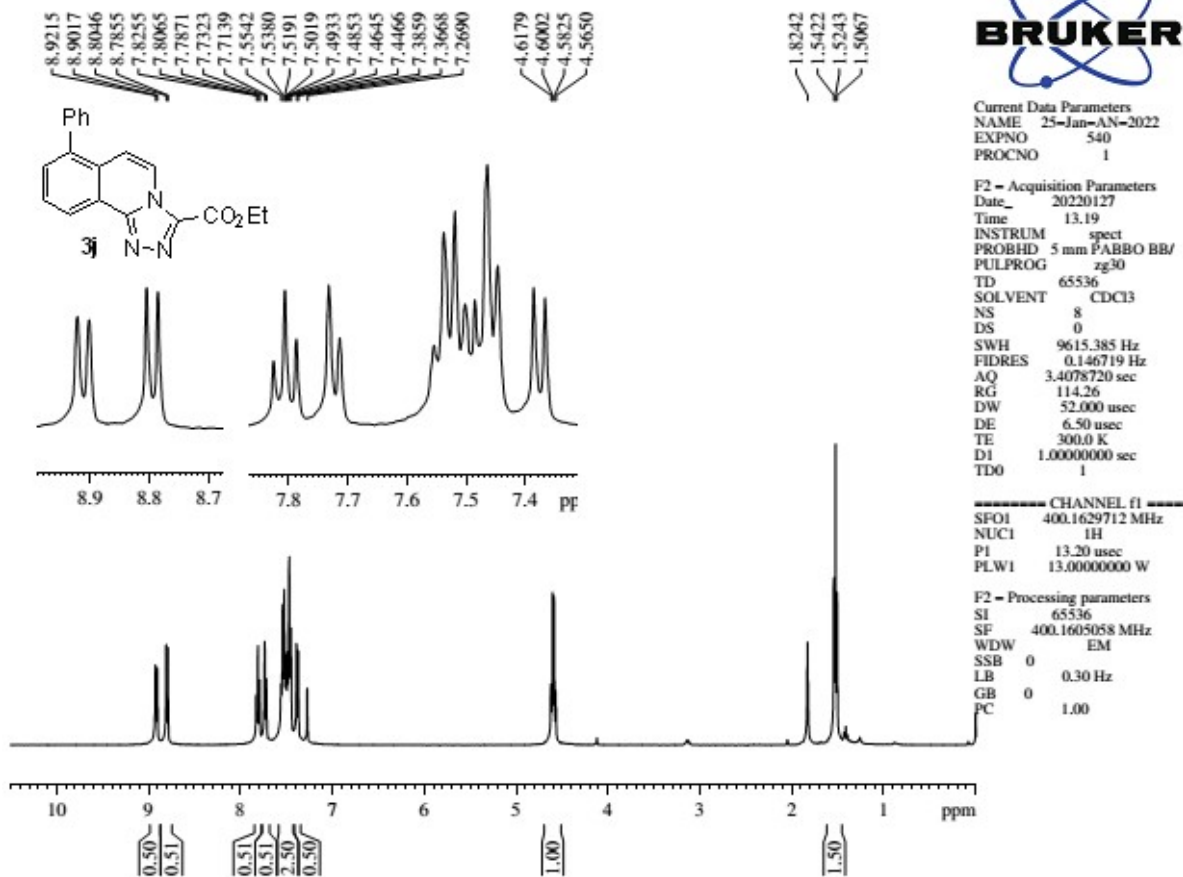

Figure S25: <sup>1</sup>H NMR spectrum of **3j**

NRLD-91P

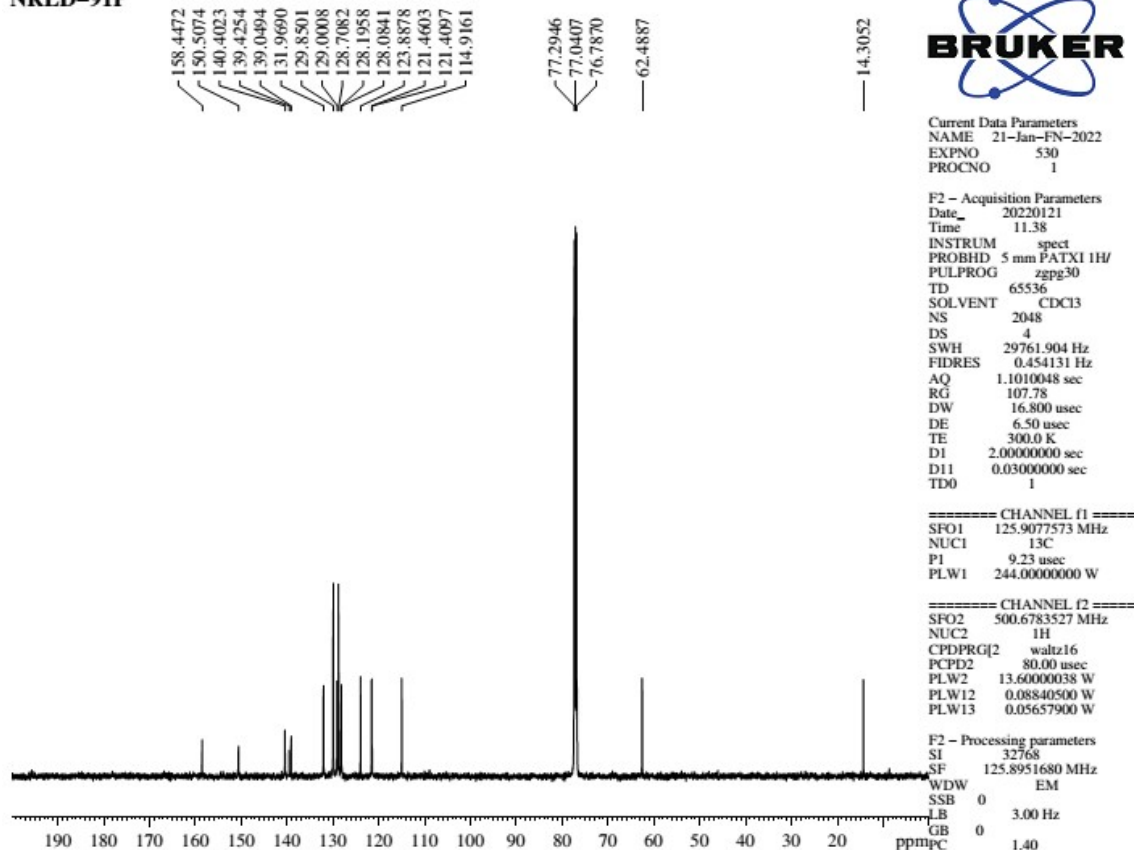

Figure S26: <sup>13</sup>C NMR spectrum of **3j**

NRLD-661

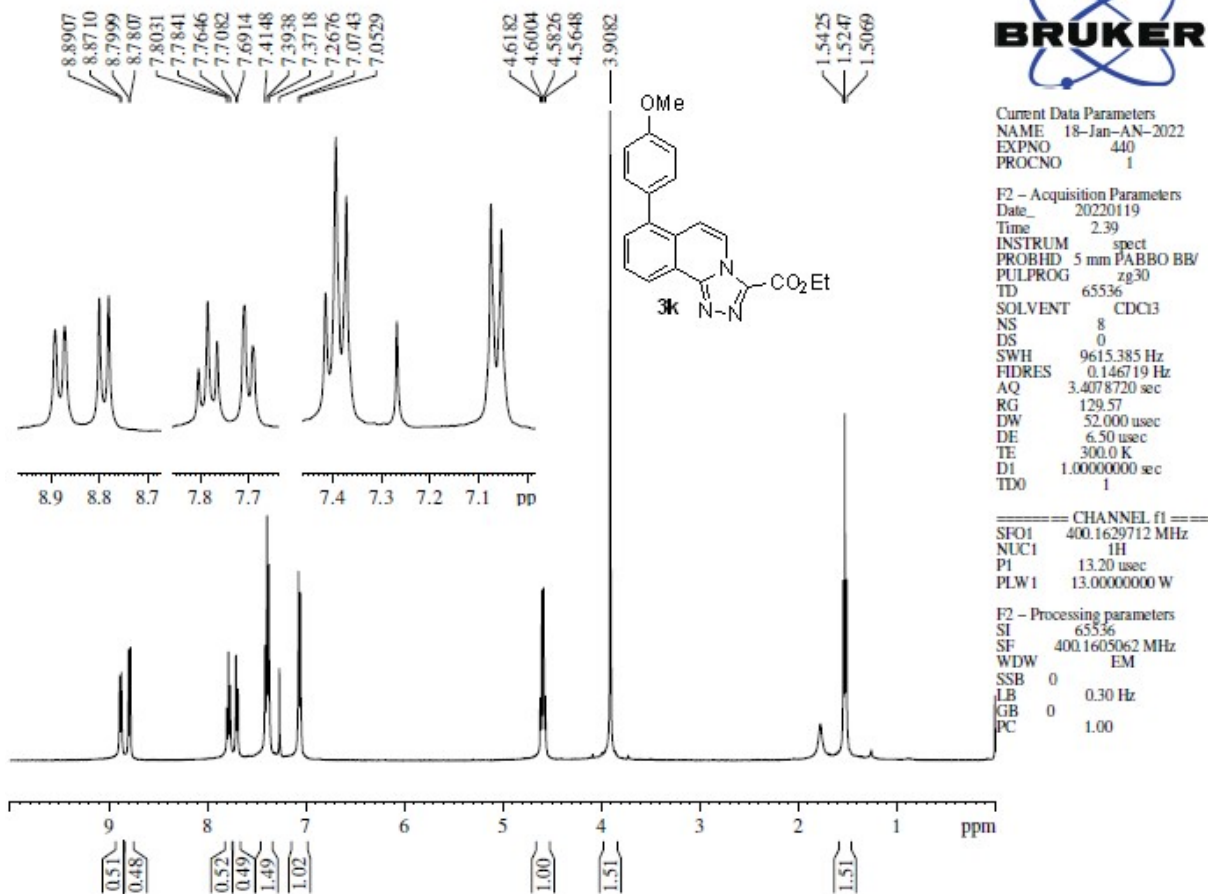

Figure S27: <sup>1</sup>H NMR spectrum of 3k

NRLD-661

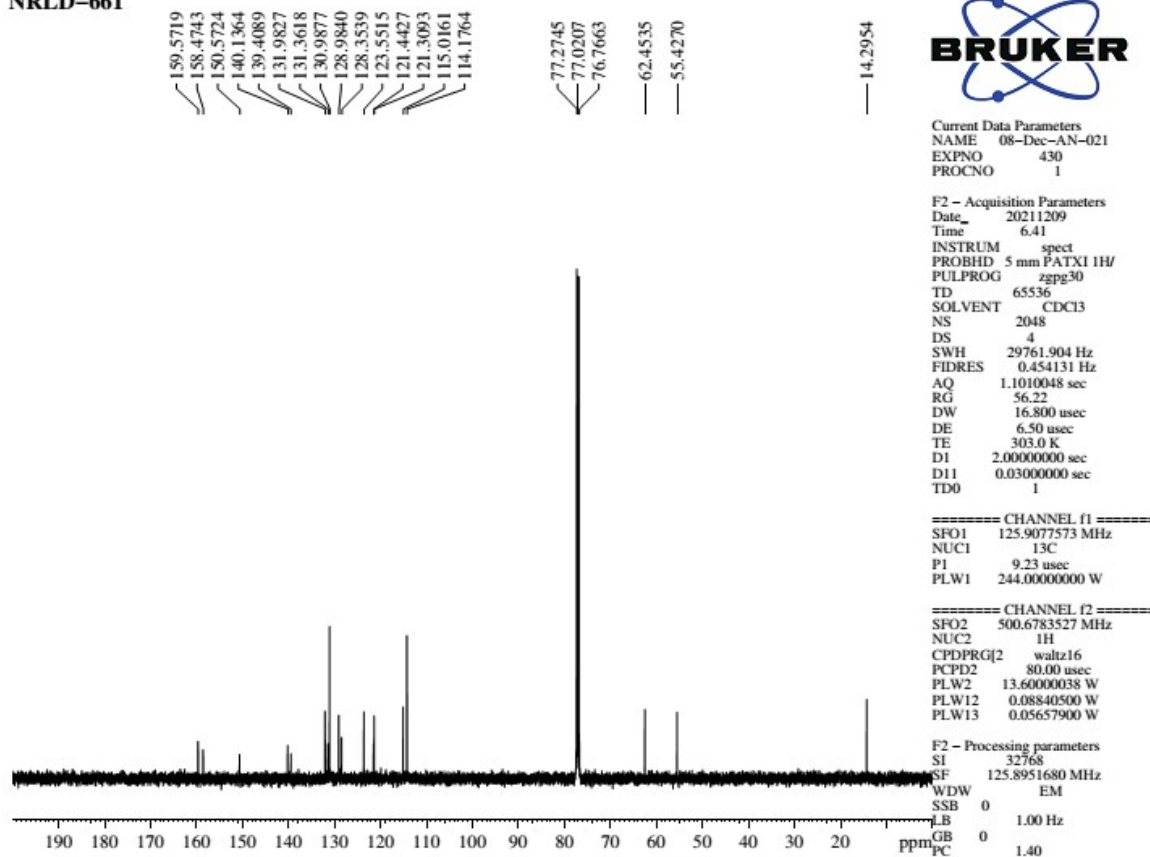

Figure S28: <sup>13</sup>C NMR spectrum of 3k

NRLD-687

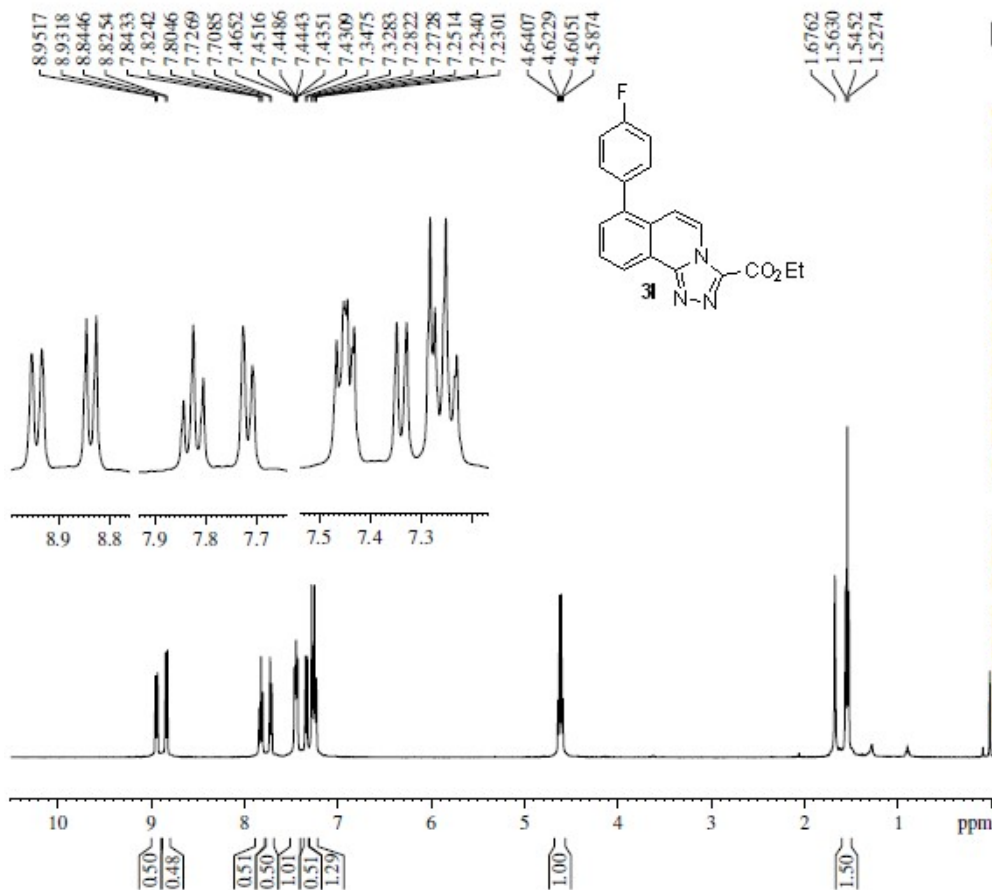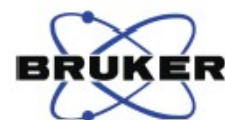

Current Data Parameters  
 NAME 10-Feb-AN-2022  
 EXPNO 310  
 PROCNO 1

F2 - Acquisition Parameters  
 Date\_ 20220211  
 Time 11.35  
 INSTRUM spect  
 PROBHD 5 mm PABBO BB/  
 PULPROG zg30  
 TD 65536  
 SOLVENT CDCl3  
 NS 8  
 DS 4  
 SWH 9615.385 Hz  
 FIDRES 0.146719 Hz  
 AQ 3.4078720 sec  
 RG 201.48  
 DW 52.000 usec  
 DE 6.50 usec  
 TE 300.0 K  
 D1 1.00000000 sec  
 TD0 1

==== CHANNEL f1 ====  
 SFO1 400.1629712 MHz  
 NUC1 1H  
 P1 13.20 usec  
 PLW1 13.00000000 W

F2 - Processing parameters  
 SI 65536  
 SF 400.1605000 MHz  
 WDW EM  
 SSB 0  
 LB 0.30 Hz  
 GB 0  
 PC 1.00

Figure S29: <sup>1</sup>H NMR spectrum of **3l**

NRLD 687

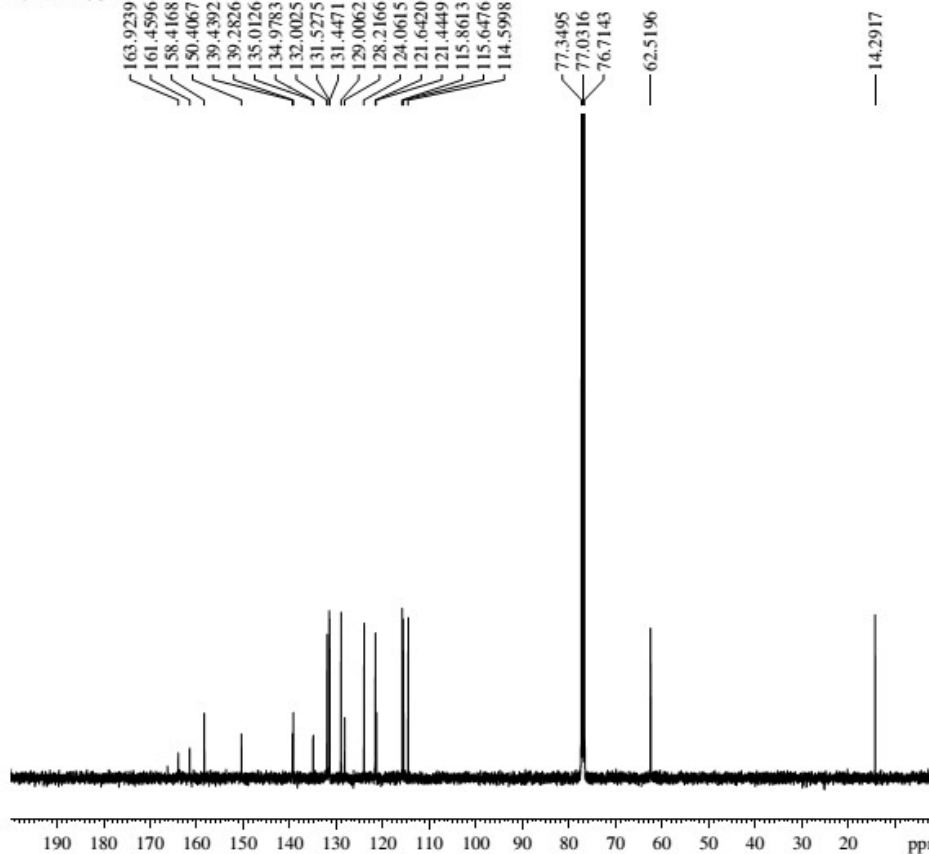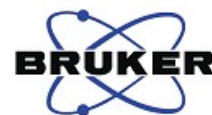

Current Data Parameters  
 NAME 20-Jan-FN-2022  
 EXPNO 420  
 PROCNO 1

F2 - Acquisition Parameters  
 Date\_ 20220121  
 Time 3.51  
 INSTRUM spect  
 PROBHD 5 mm PABBO BB/  
 PULPROG zgpg30  
 TD 65536  
 SOLVENT CDCl3  
 NS 2048  
 DS 0  
 SWH 24038.461 Hz  
 FIDRES 0.366798 Hz  
 AQ 1.3631488 sec  
 RG 201.48  
 DW 20.800 usec  
 DE 6.50 usec  
 TE 300.0 K  
 D1 2.00000000 sec  
 D11 0.03000000 sec  
 TD0 1

==== CHANNEL f1 ====  
 SFO1 100.6304993 MHz  
 NUC1 13C  
 P1 9.90 usec  
 PLW1 53.00000000 W

==== CHANNEL f2 ====  
 SFO2 400.1621006 MHz  
 NUC2 1H  
 CPDPRG[2] waltz16  
 PCPD2 90.00 usec  
 PLW2 13.00000000 W  
 PLW12 0.27963999 W  
 PLW13 0.22651000 W

F2 - Processing parameters  
 SI 32768  
 SF 100.6204380 MHz  
 WDW EM  
 SSB 0  
 LB 1.00 Hz  
 GB 0  
 PC 1.40

Figure S30: <sup>13</sup>C NMR spectrum of **3l**

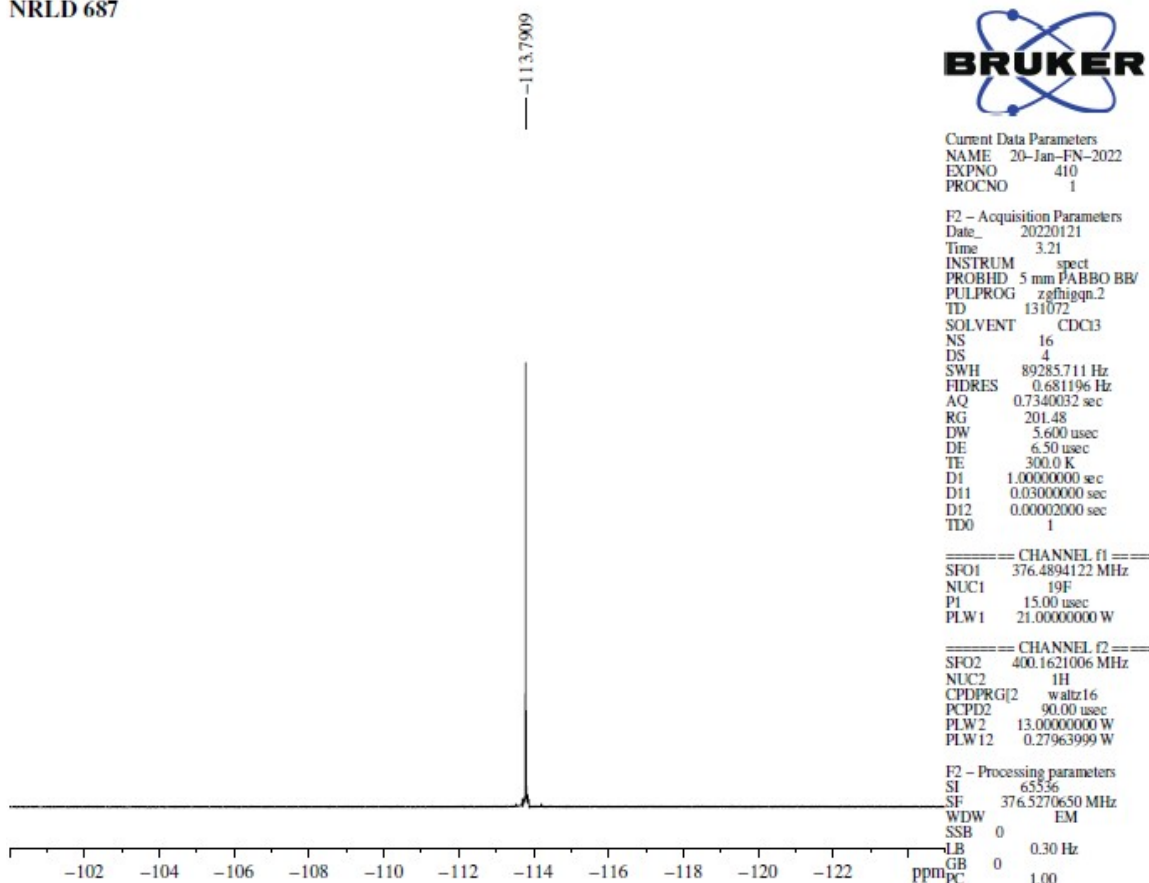

Figure S31: <sup>19</sup>F NMR spectrum of 3l

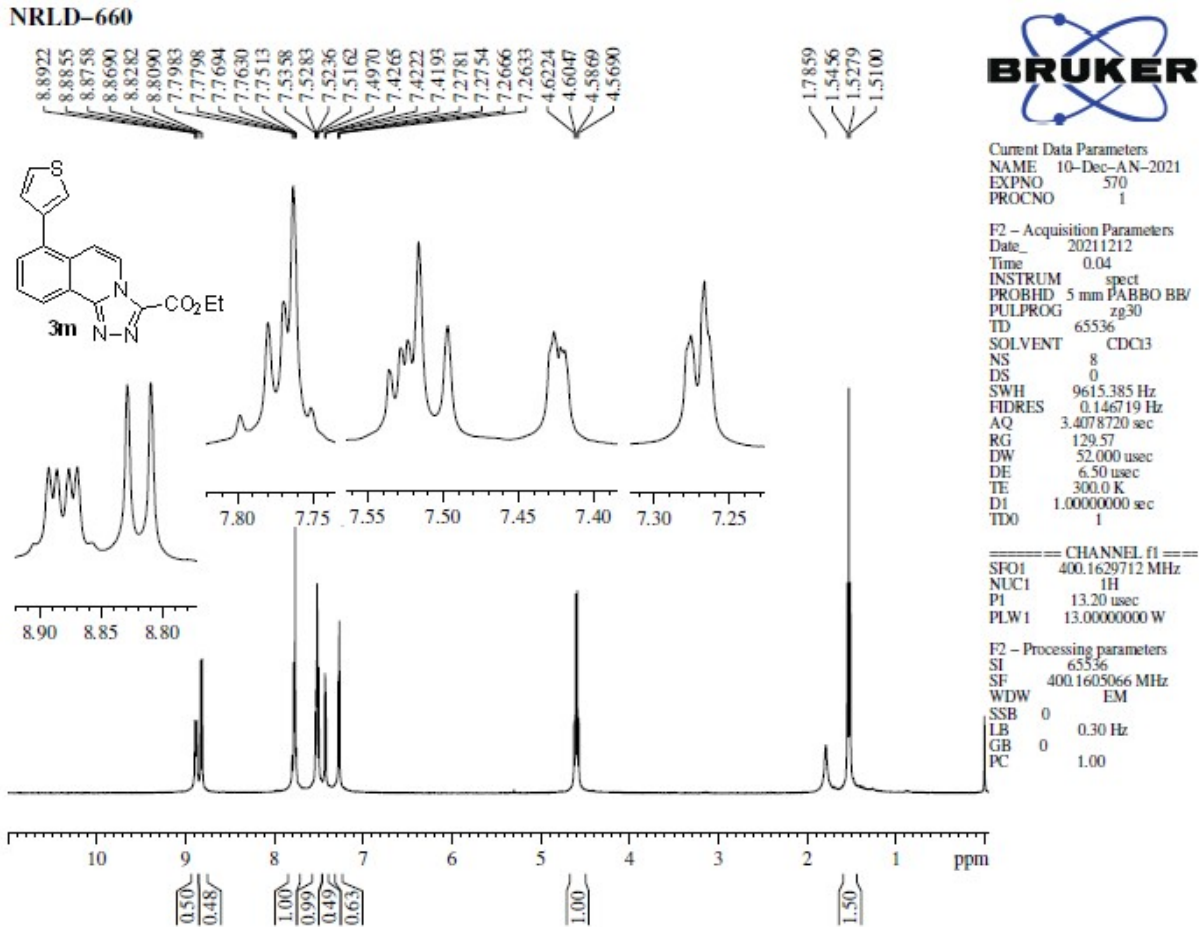

Figure S32: <sup>1</sup>H NMR spectrum of 3m

NRLD-660

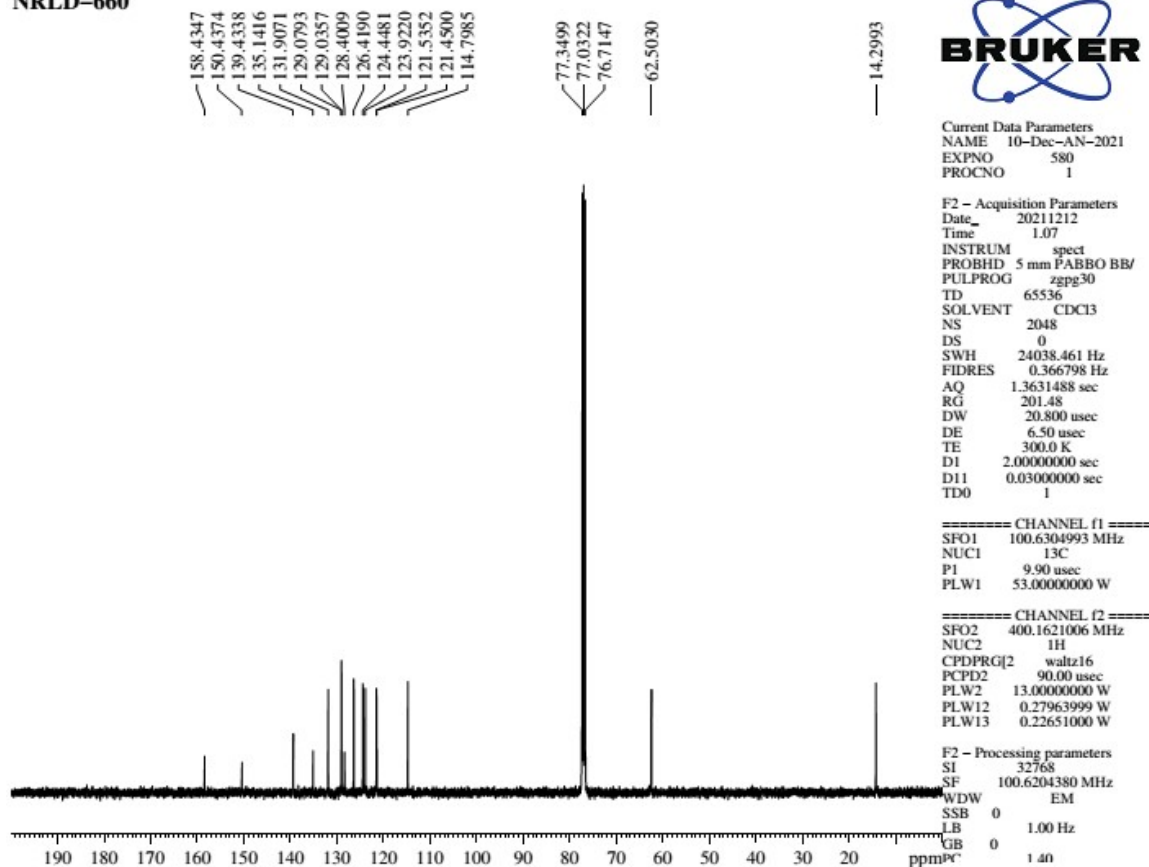

Figure S33: <sup>13</sup>C NMR spectrum of 3m

NRLD-651

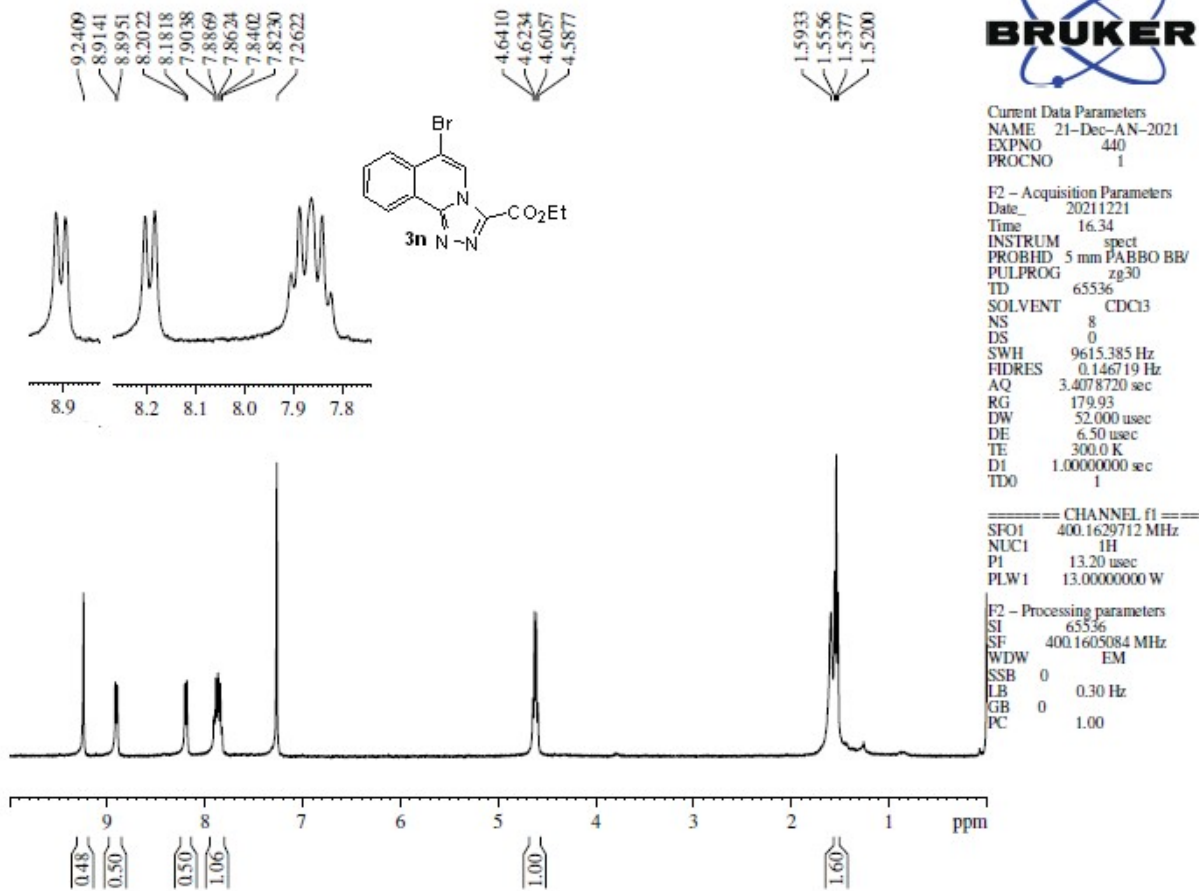

Figure S34: <sup>1</sup>H NMR spectrum of 3n



NRLD-651

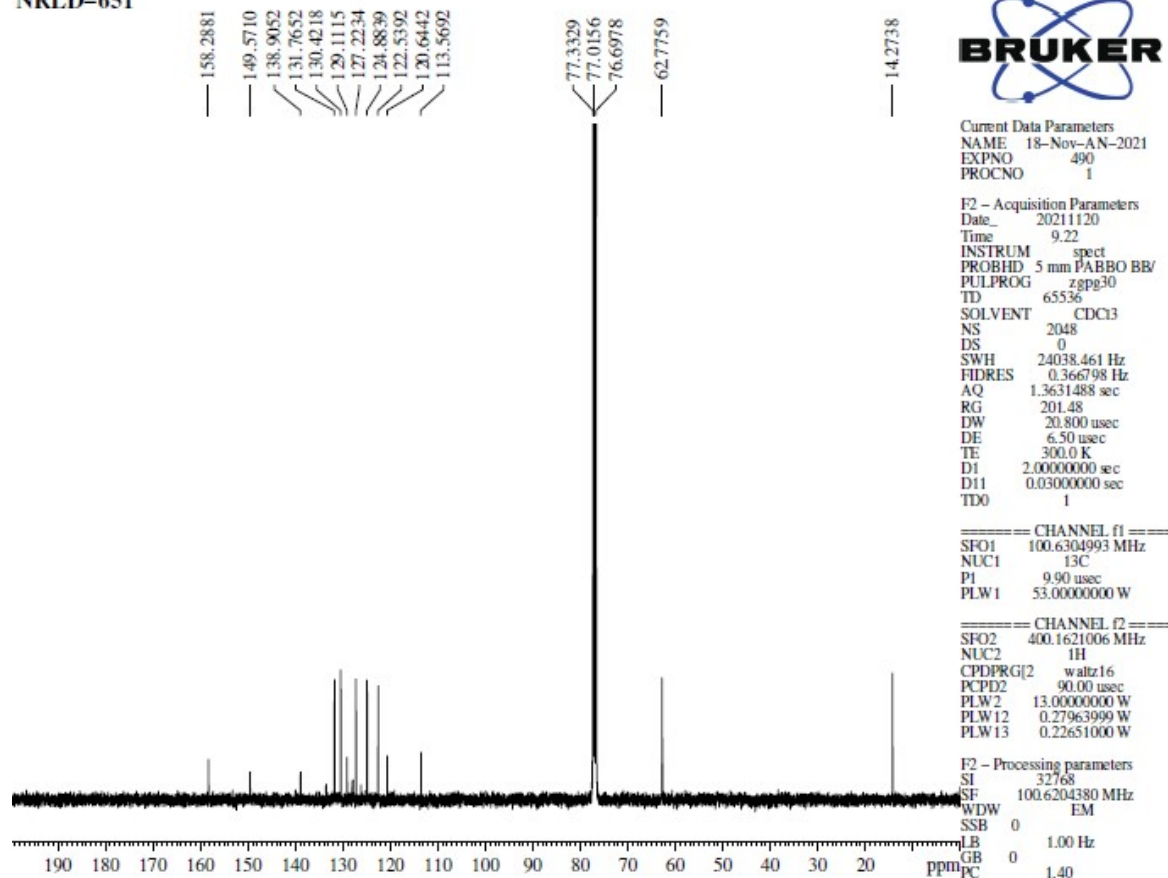

Figure S35: <sup>13</sup>C NMR spectrum of 3n

NRLD 658

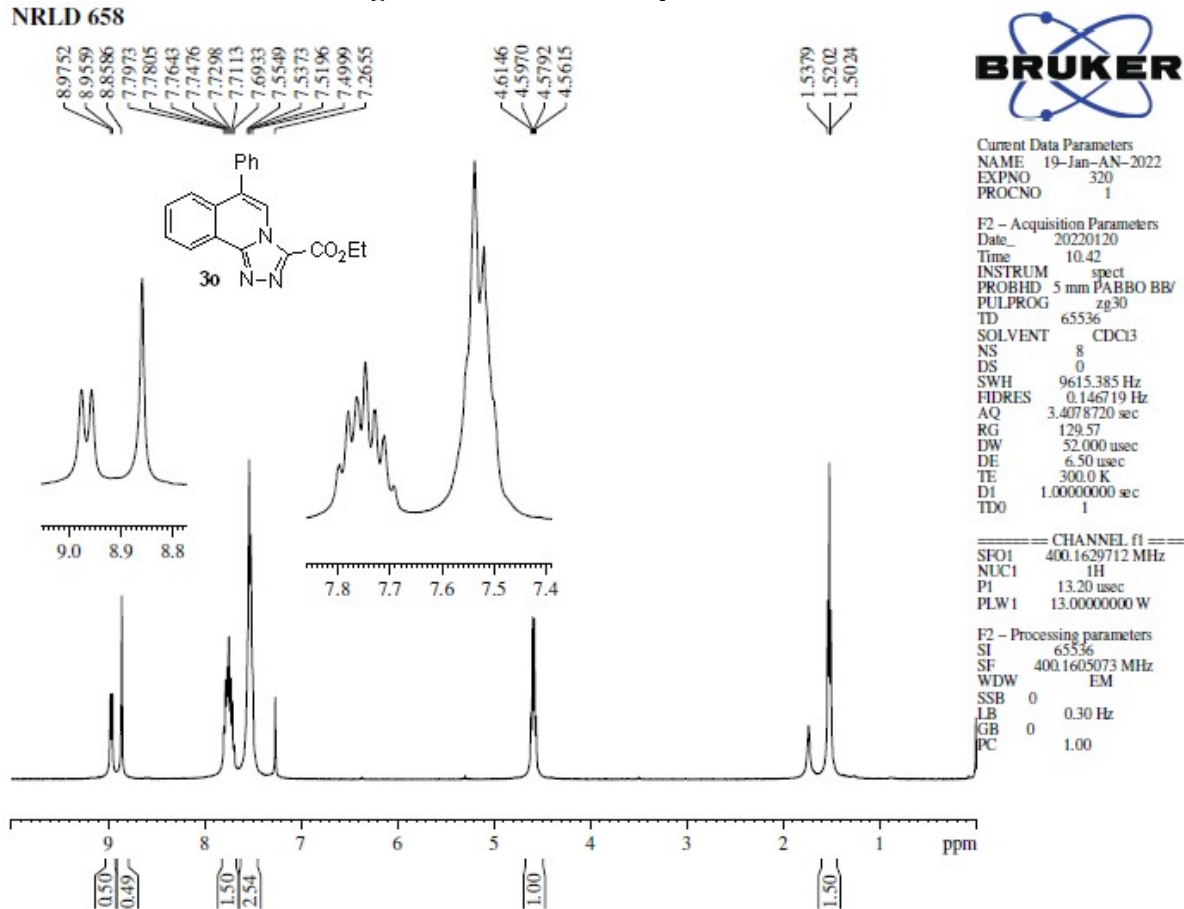

Figure S36: <sup>1</sup>H NMR spectrum of 3o

NRLD-658

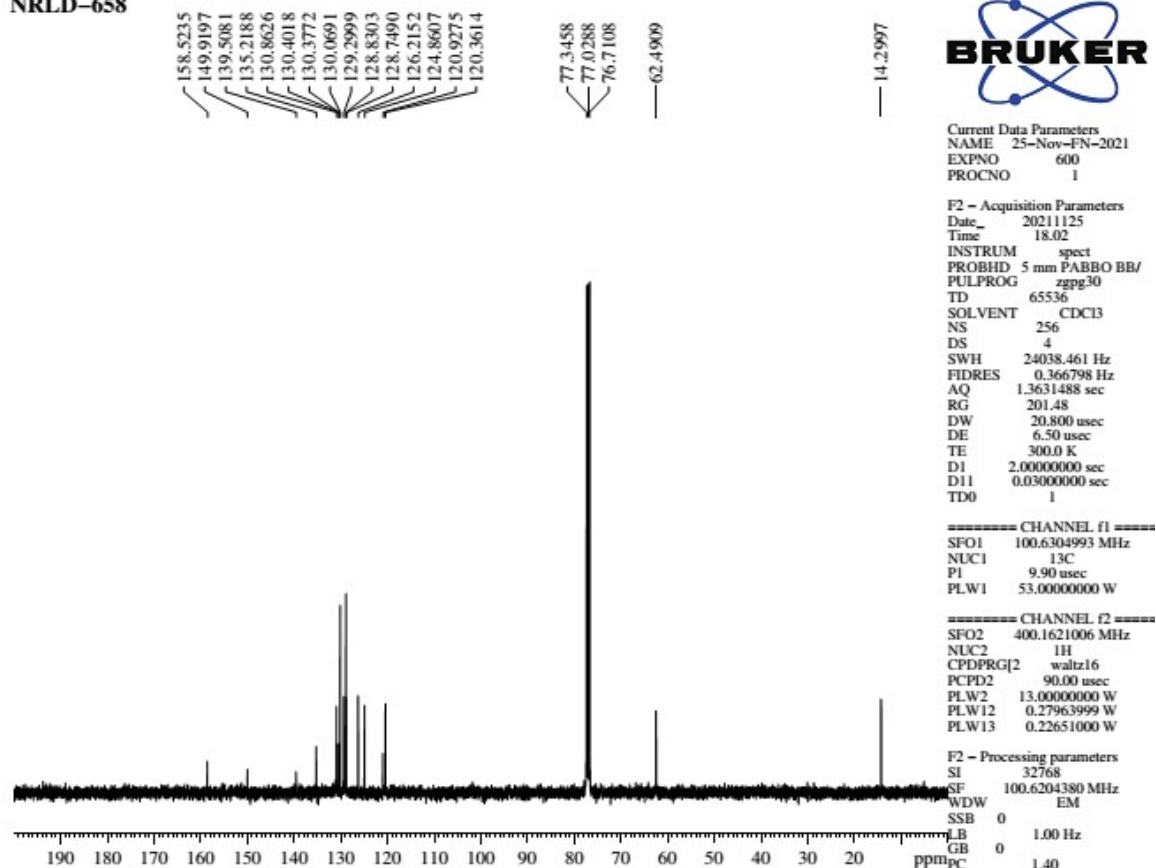

Figure S37: <sup>13</sup>C NMR spectrum of 3o

NRLD-662

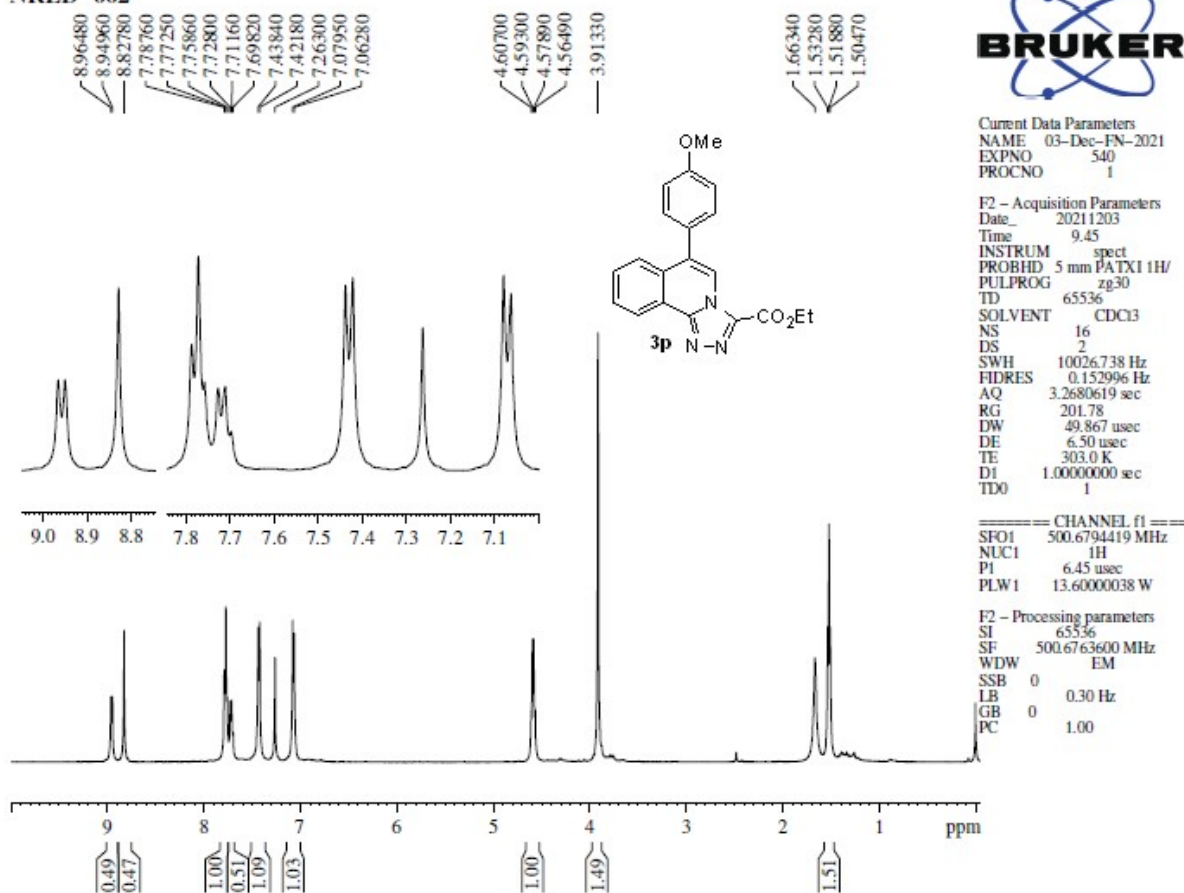

Figure S38: <sup>1</sup>H NMR spectrum of 3p

NRLD-662

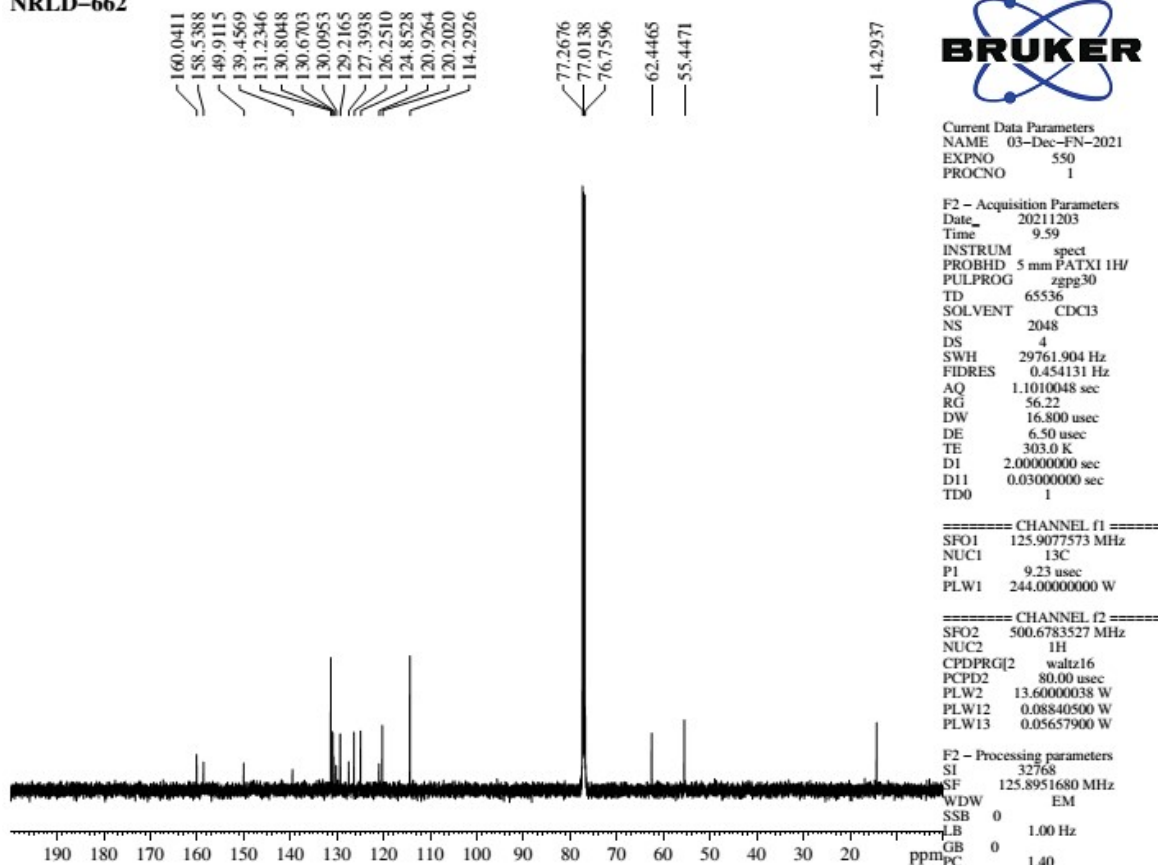

Figure S39: <sup>13</sup>C NMR spectrum of 3p

NRLD-636

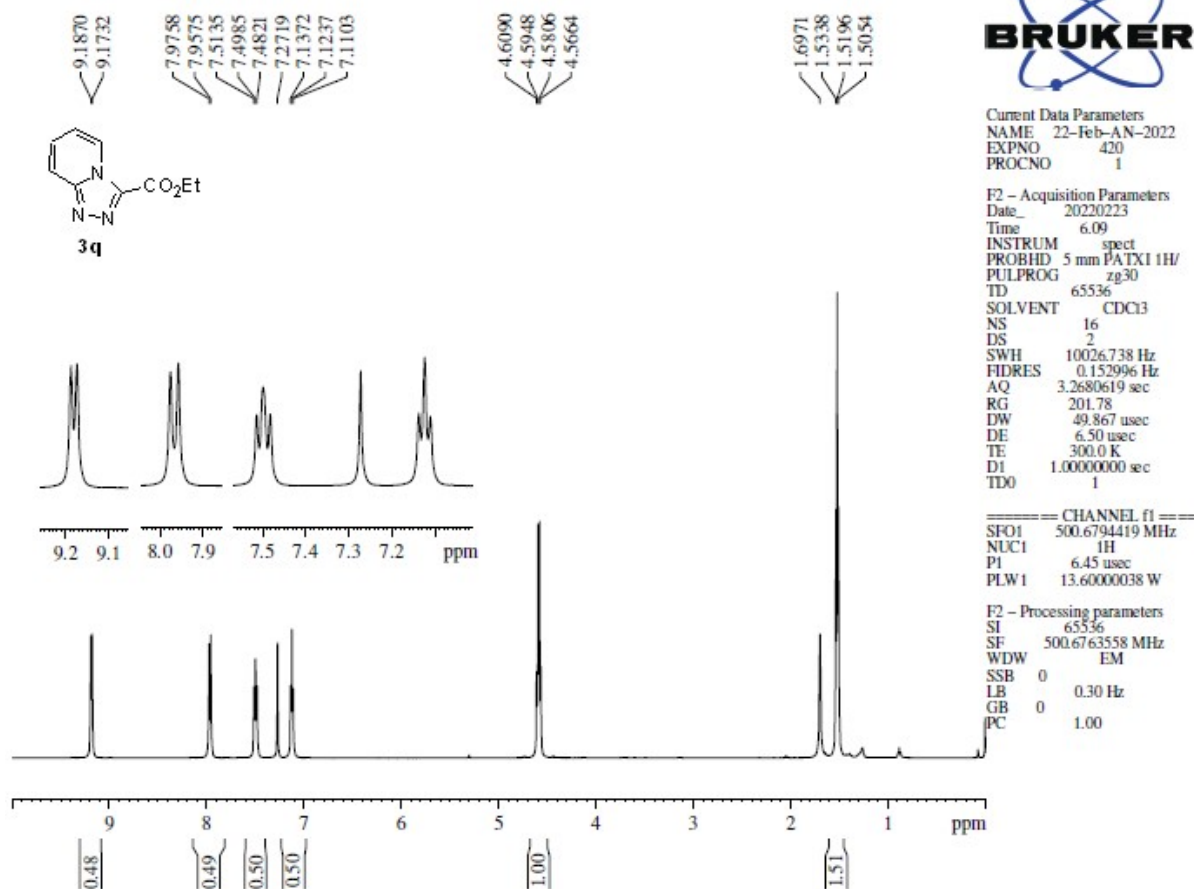

Figure S40: <sup>1</sup>H NMR spectrum of 3q

NRLD 636

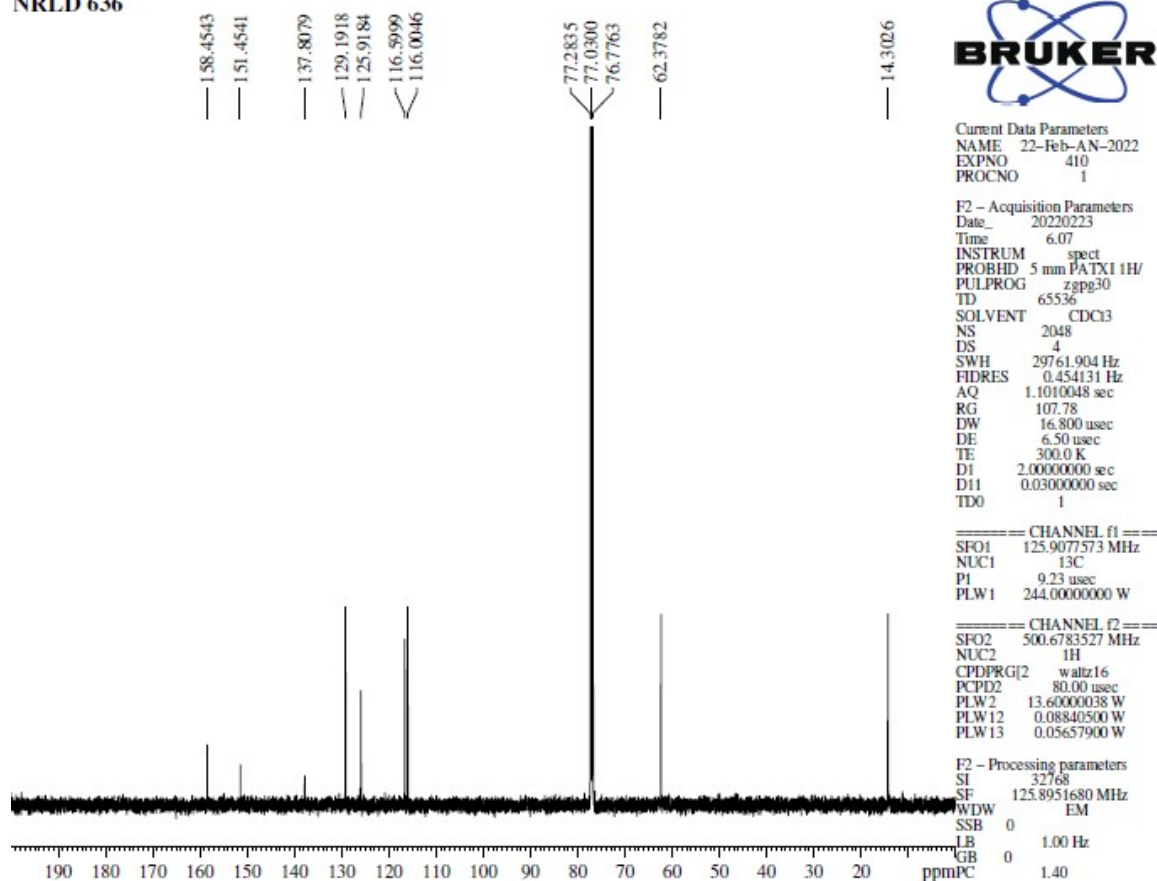

Figure S41: <sup>13</sup>C NMR spectrum of 3q

NRLD-705

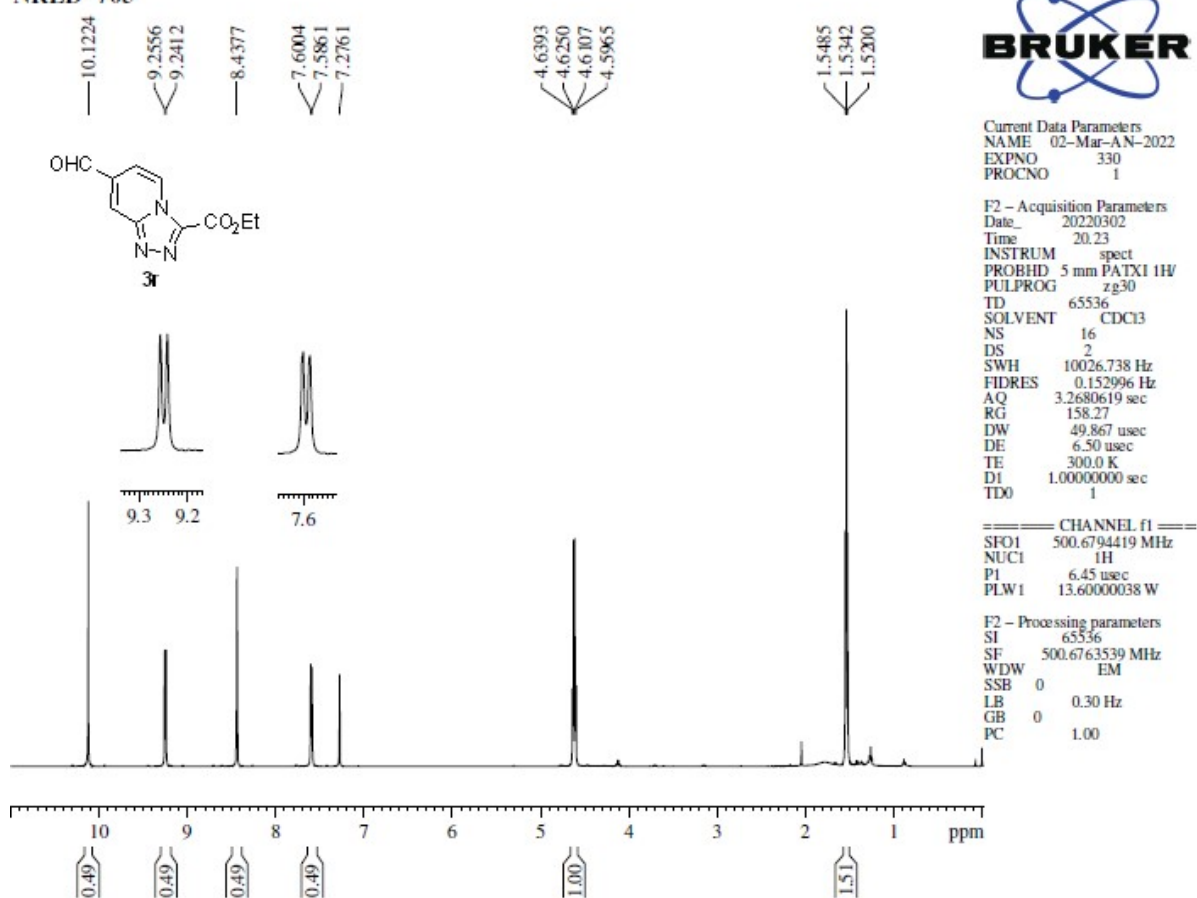

Figure S42: <sup>1</sup>H NMR spectrum of 3r

NRLD-705

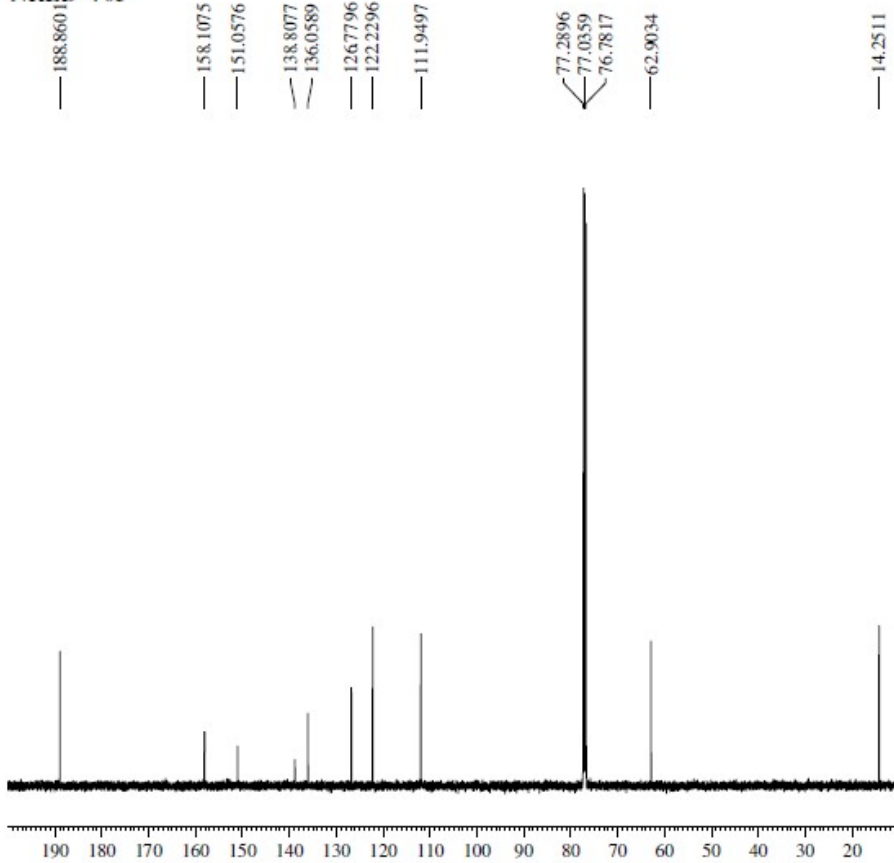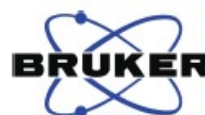

Current Data Parameters  
NAME 02-Mar-A-N-2022  
EXPNO 340  
PROCNO 1

F2 - Acquisition Parameters  
Date\_ 20220302  
Time 21.23  
INSTRUM spect  
PROBHD 5 mm PATXI 1H  
PULPROG zgpg30  
TD 65536  
SOLVENT CDCl3  
NS 2048  
DS 4  
SWH 29761.904 Hz  
FIDRES 0.454131 Hz  
AQ 1.1010048 sec  
RG 107.78  
DW 16.800 usec  
DE 6.50 usec  
TE 300.0 K  
D1 2.00000000 sec  
D11 0.03000000 sec  
TD0 1

==== CHANNEL f1 ====  
SFO1 125.9077573 MHz  
NUC1 13C  
P1 9.23 usec  
PLW1 244.00000000 W

==== CHANNEL f2 ====  
SFO2 500.6783527 MHz  
NUC2 1H  
CPDPRG2 waltz16  
PCPD2 80.00 usec  
PLW2 13.60000038 W  
PLW12 0.08840500 W  
PLW13 0.05657900 W

F2 - Processing parameters  
SI 32768  
SF 125.8951680 MHz  
WDW EM  
SSB 0  
LB 1.00 Hz  
GB 0  
PC 1.40

Figure S43: <sup>13</sup>C NMR spectrum of 3r

NRLD-703

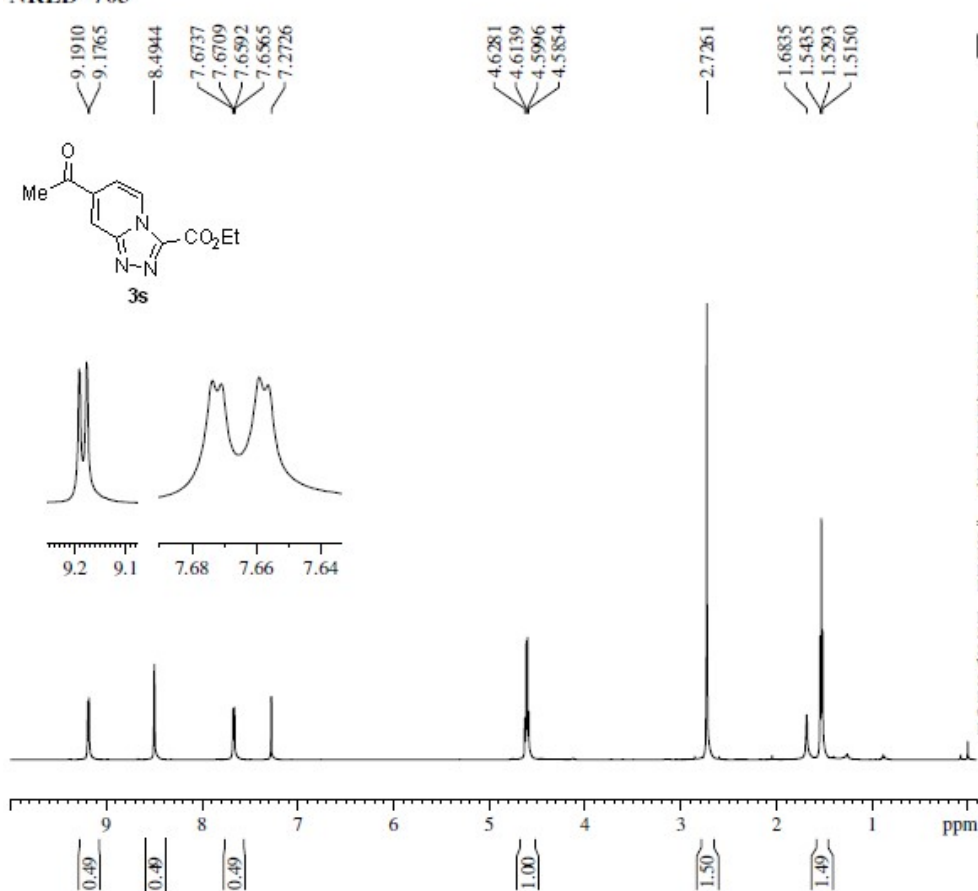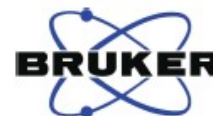

Current Data Parameters  
NAME 02-Mar-FN-2022  
EXPNO 590  
PROCNO 1

F2 - Acquisition Parameters  
Date\_ 20220302  
Time 13.06  
INSTRUM spect  
PROBHD 5 mm PATXI 1H  
PULPROG zg30  
TD 65536  
SOLVENT CDCl3  
NS 16  
DS 2  
SWH 10026.738 Hz  
FIDRES 0.152996 Hz  
AQ 3.2680619 sec  
RG 181.18  
DW 49.867 usec  
DE 6.50 usec  
TE 300.0 K  
D1 1.00000000 sec  
TD0 1

==== CHANNEL f1 ====  
SFO1 500.6794419 MHz  
NUC1 1H  
P1 6.45 usec  
PLW1 13.60000038 W

F2 - Processing parameters  
SI 65536  
SF 500.6763556 MHz  
WDW EM  
SSB 0  
LB 0.30 Hz  
GB 0  
PC 1.00

Figure S44: <sup>1</sup>H NMR spectrum of 3s

NRLD-703

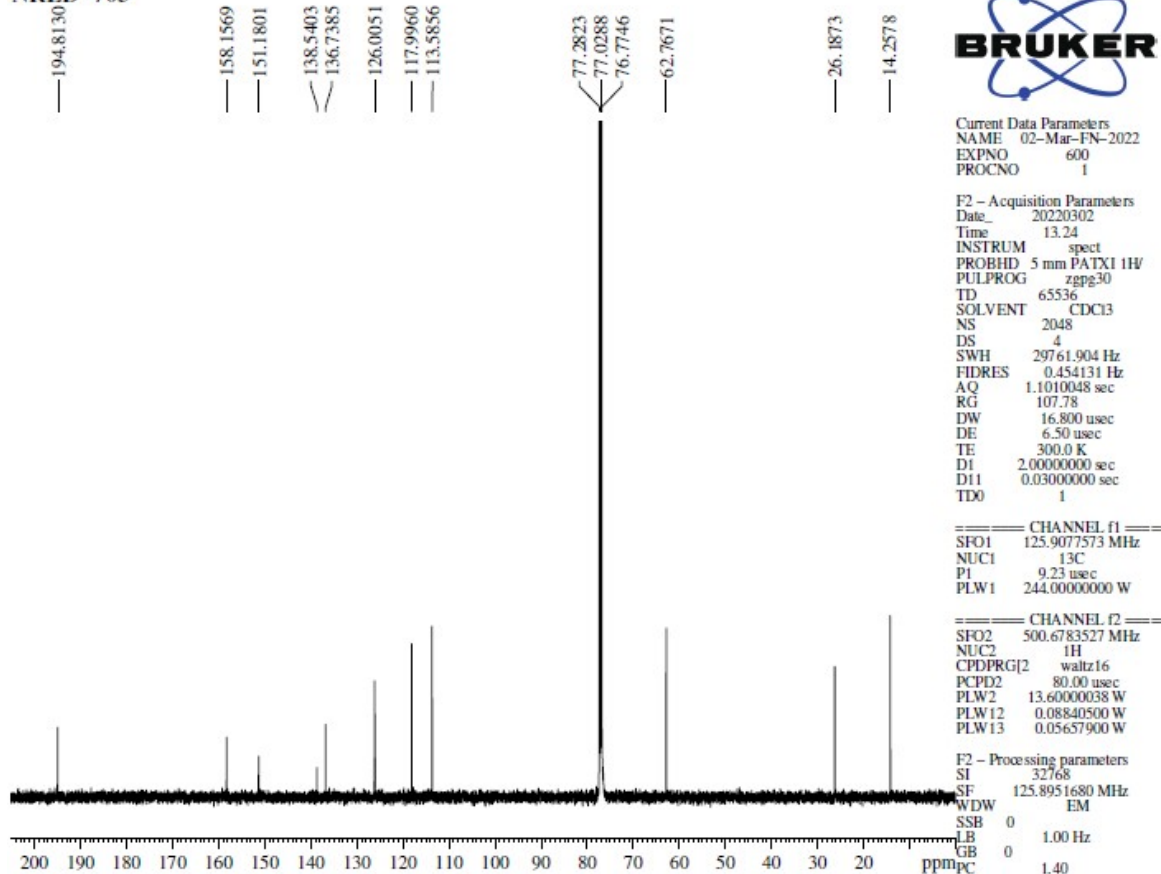

Figure S45: <sup>13</sup>C NMR spectrum of 3s

NRLD-707

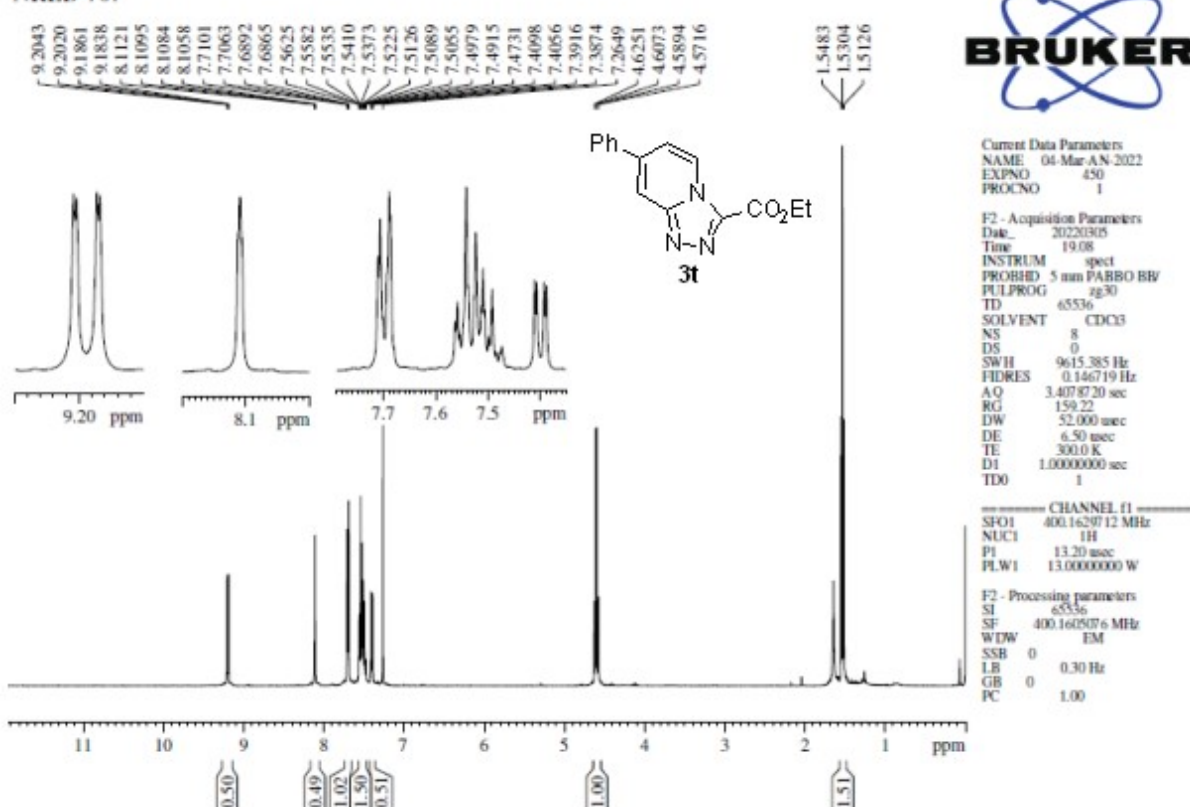

Figure S46: <sup>1</sup>H NMR spectrum of 3t

NRLD-707

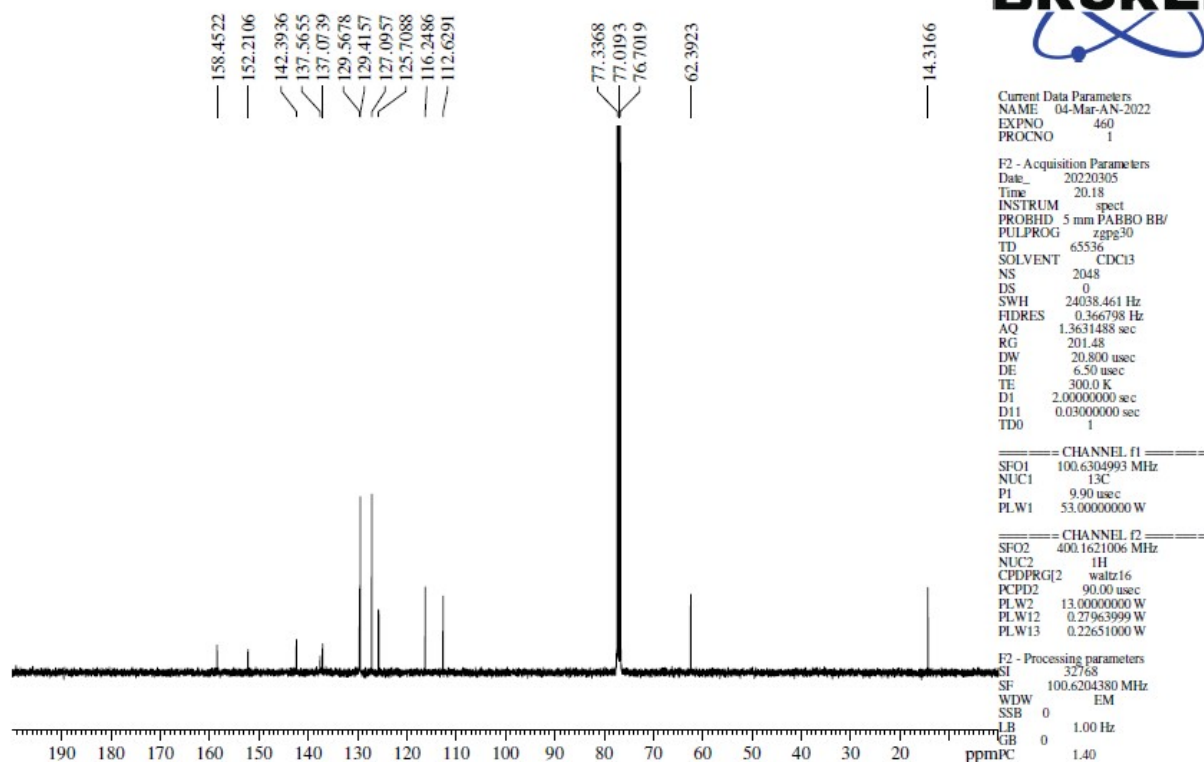

Figure S47: <sup>13</sup>C NMR spectrum of 3t

NRLD 724

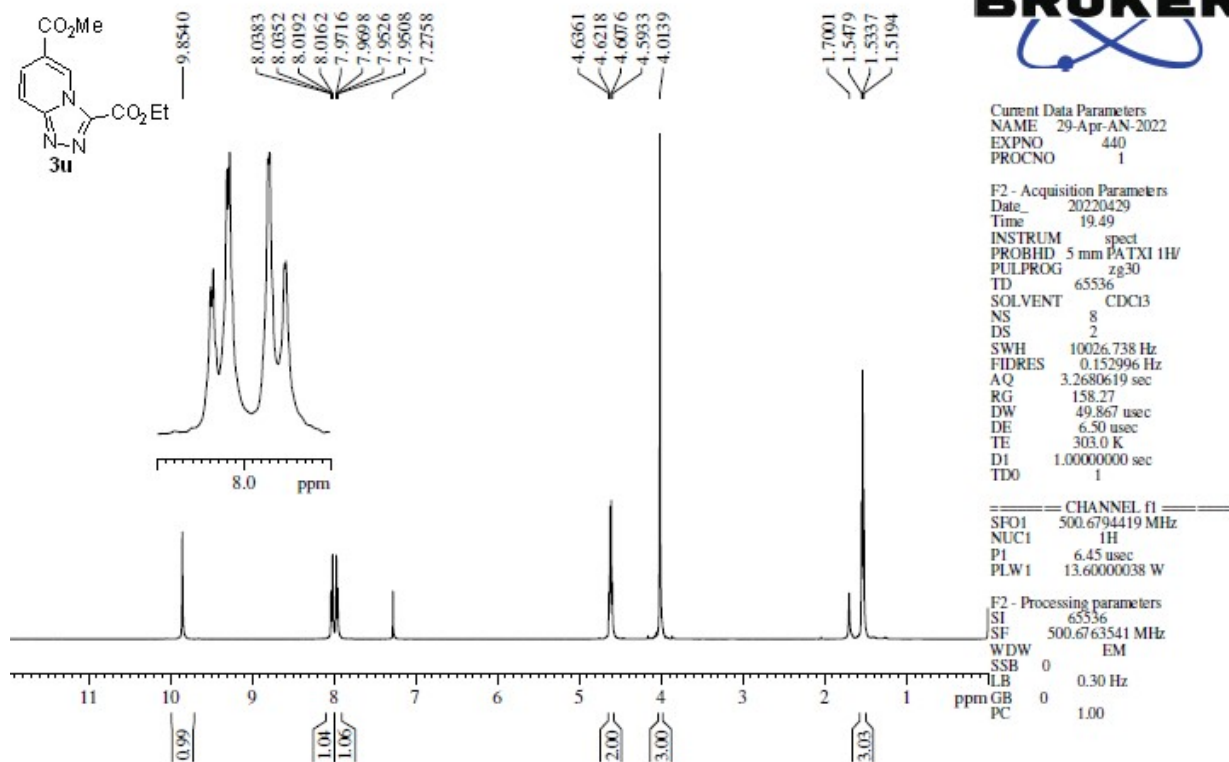

Figure S48: <sup>1</sup>H NMR spectrum of 3u

NRLD 724

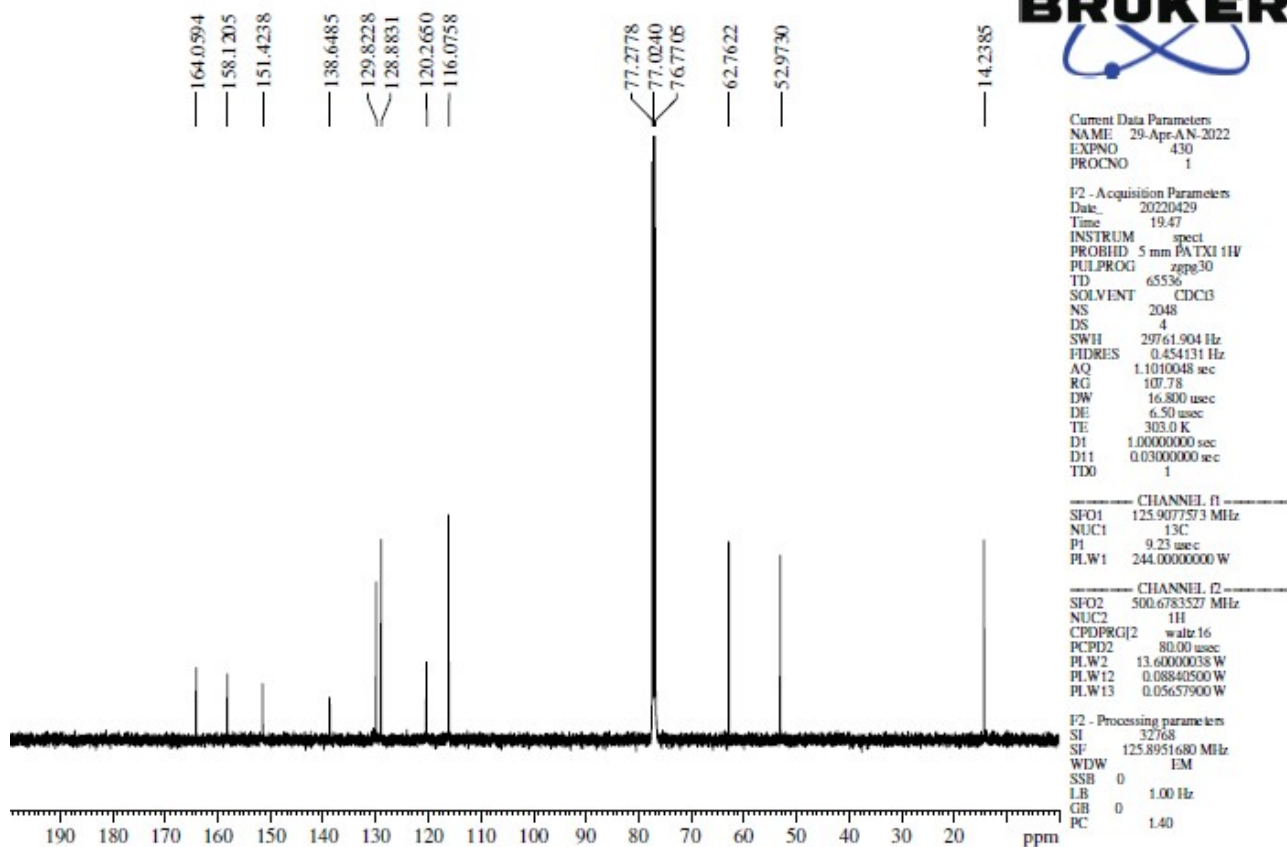

Figure S49: <sup>13</sup>C NMR spectrum of 3u

NRLD-725

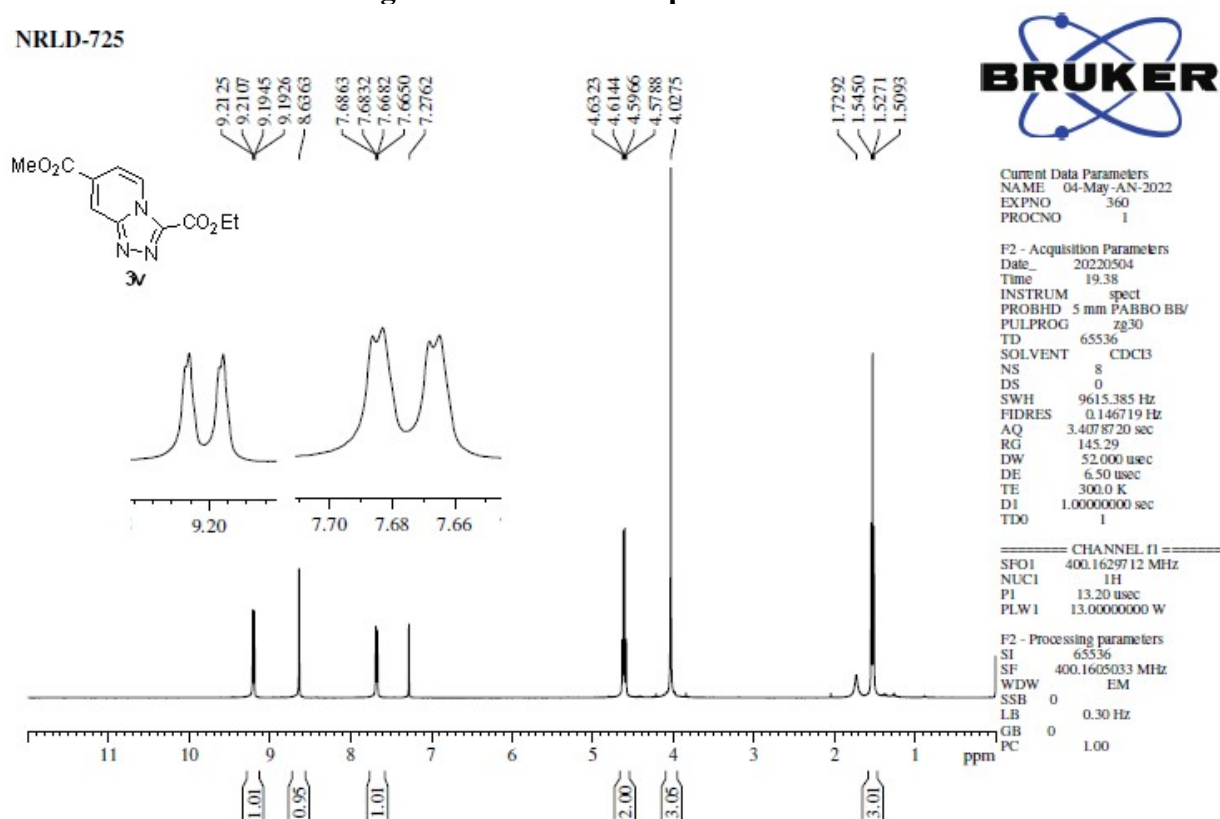

Figure S50: <sup>1</sup>H NMR spectrum of 3v



NRLD 725

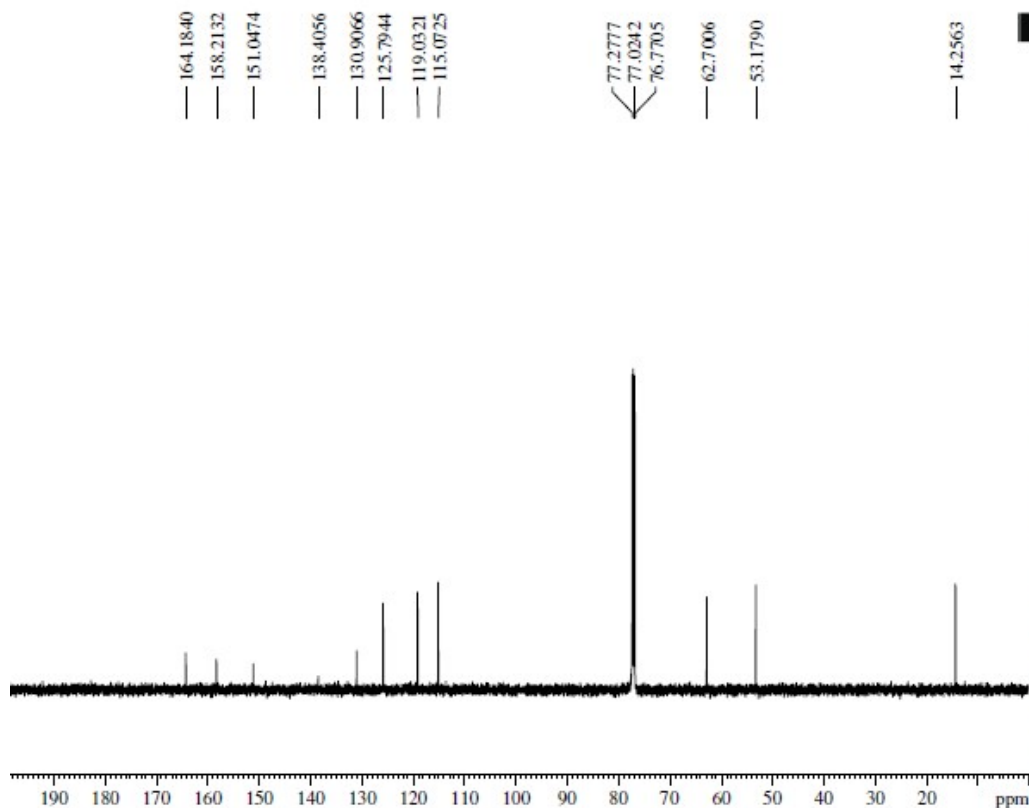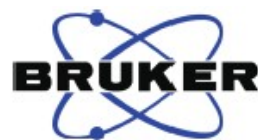

Current Data Parameters  
 NAME 02-May-AN-2022  
 EXPNO 350  
 PROCNO 1

F2 - Acquisition Parameters  
 Date\_ 20220503  
 Time 0.42  
 INSTRUM spect  
 PROBHD 5 mm PATXI 1H/1  
 PULPROG zgpg30  
 TD 65536  
 SOLVENT CDCl3  
 NS 2048  
 DS 4  
 SWH 29761.904 Hz  
 FIDRES 0.454131 Hz  
 AQ 1.1010048 sec  
 RG 56.22  
 DW 16.800 usec  
 DE 6.50 usec  
 TE 303.0 K  
 D1 1.00000000 sec  
 D11 0.03000000 sec  
 TDO 1

==== CHANNEL f1 =====  
 SFO1 125.9077573 MHz  
 NUC1 13C  
 P1 9.23 usec  
 PLW1 244.00000000 W

==== CHANNEL f2 =====  
 SFO2 500.6783527 MHz  
 NUC2 1H  
 CPDPRG2 waltz 16  
 PCPD2 80.00 usec  
 PLW2 13.60000038 W  
 PLW12 0.08840500 W  
 PLW13 0.05657900 W

F2 - Processing parameters  
 SI 32768  
 SF 125.8951680 MHz  
 WDW EM  
 SSB 0  
 LB 1.00 Hz  
 GB 0  
 PC 1.40

Figure S51: <sup>13</sup>C NMR spectrum of 3v

NRLD-641

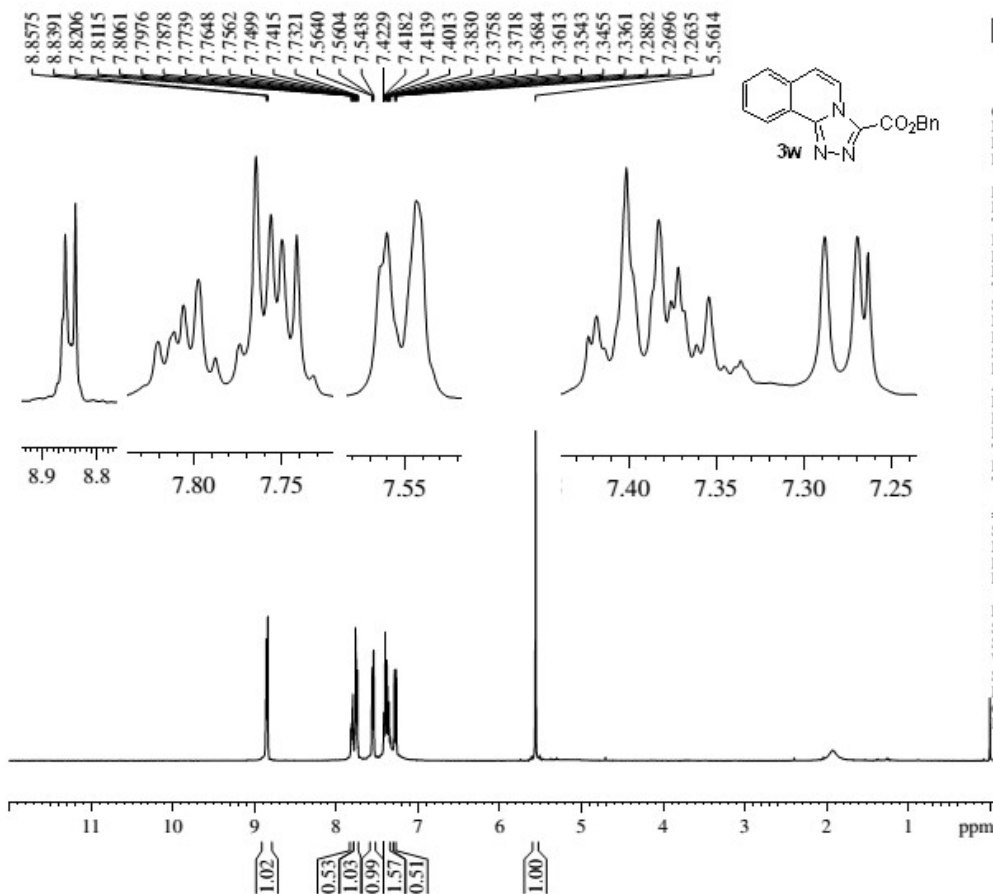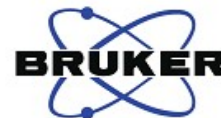

Current Data Parameters  
 NAME 23-Nov-AN-2021  
 EXPNO 490  
 PROCNO 1

F2 - Acquisition Parameters  
 Date\_ 20211124  
 Time 4.47  
 INSTRUM spect  
 PROBHD 5 mm PABBO BB/  
 PULPROG zg30  
 TD 65536  
 SOLVENT CDCl3  
 NS 8  
 DS 0  
 SWH 9615.385 Hz  
 FIDRES 0.146719 Hz  
 AQ 3.4078720 sec  
 RG 129.57  
 DW 52.000 usec  
 DE 6.50 usec  
 TE 300.0 K  
 D1 1.00000000 sec  
 TDO 1

==== CHANNEL f1 =====  
 SFO1 400.1629712 MHz  
 NUC1 1H  
 P1 13.20 usec  
 PLW1 13.00000000 W

F2 - Processing parameters  
 SI 65536  
 SF 400.1605082 MHz  
 WDW EM  
 SSB 0  
 LB 0.30 Hz  
 GB 0  
 PC 1.00

Figure S52: <sup>1</sup>H NMR spectrum of 3w

NRLD-641

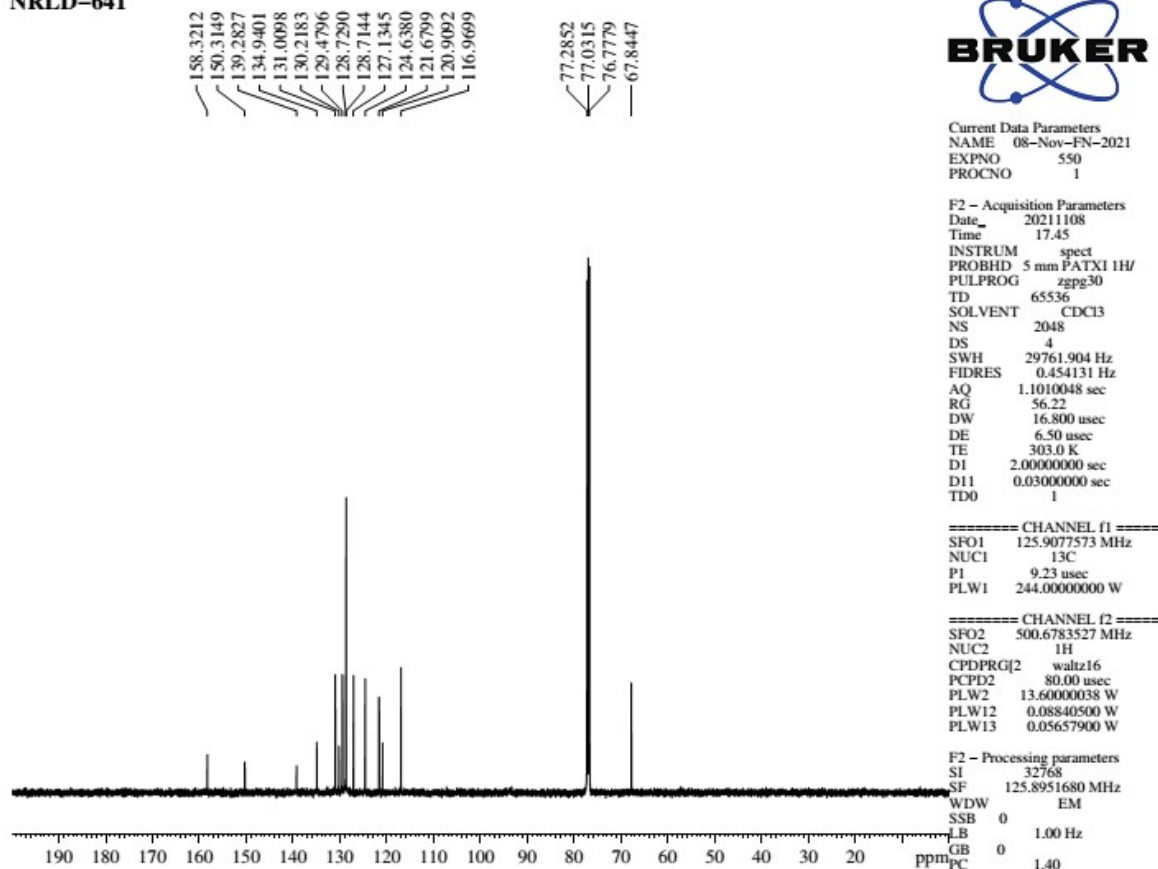

Figure S53: <sup>13</sup>C NMR spectrum of 3w

NRLD-654

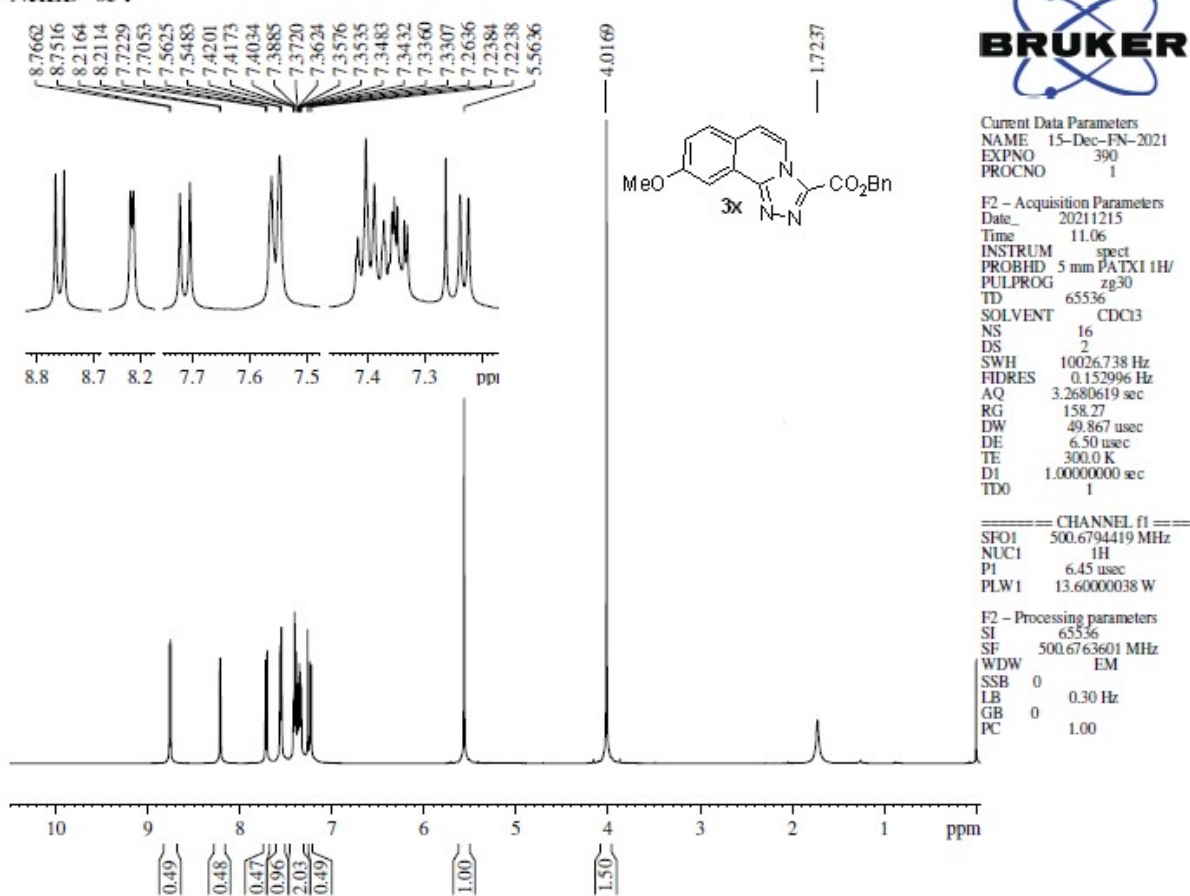

Figure S54: <sup>1</sup>H NMR spectrum of 3x

NRLD-654

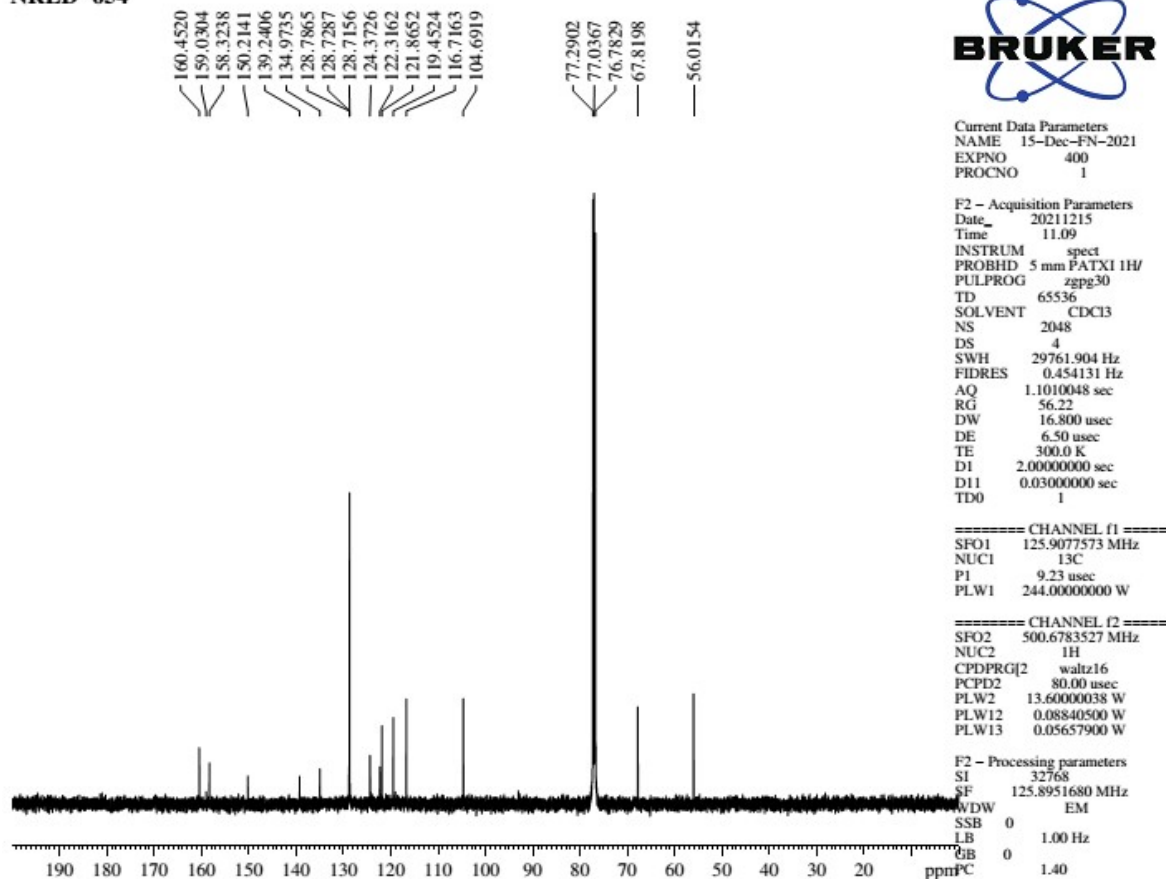

Figure S55: <sup>13</sup>C NMR spectrum of 3x

NRLD-642

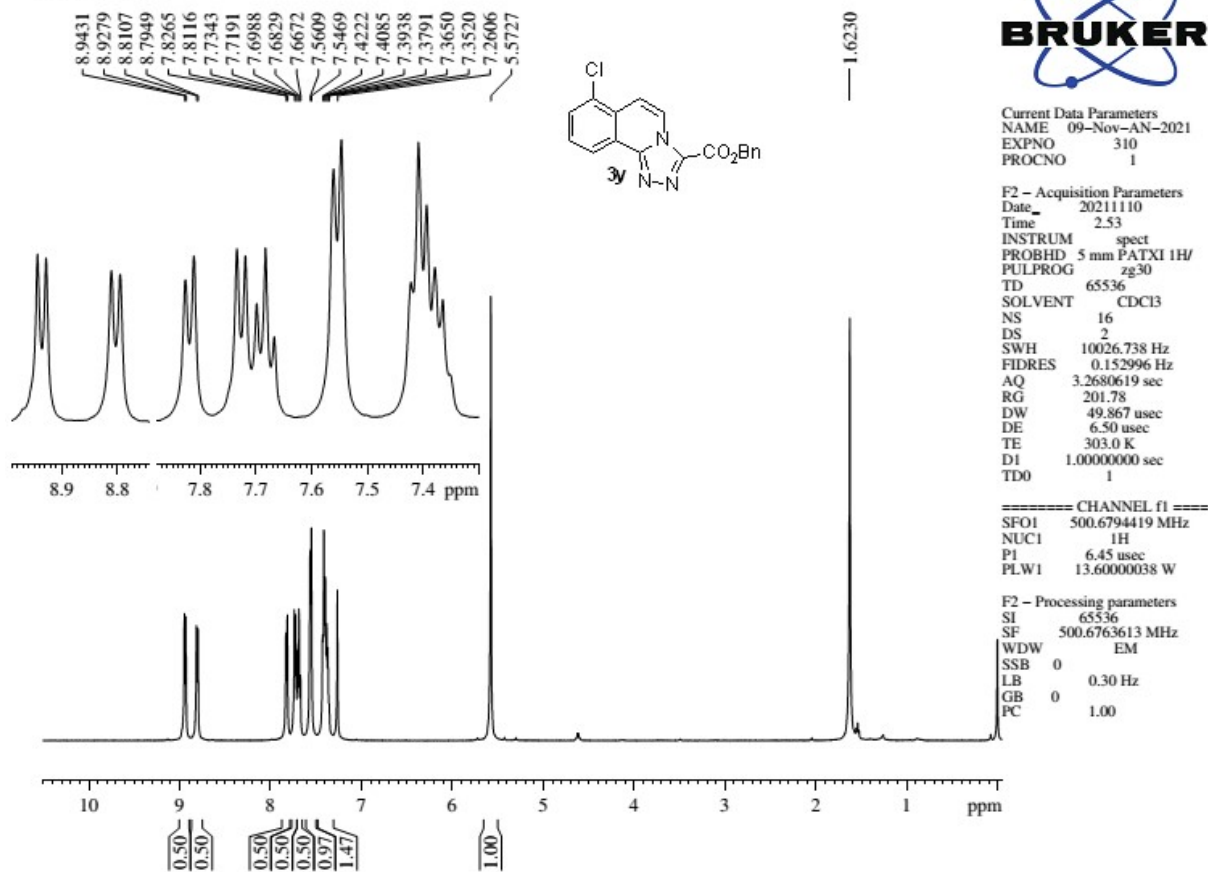

Figure S56: <sup>1</sup>H NMR spectrum of 3y

NRLD-642

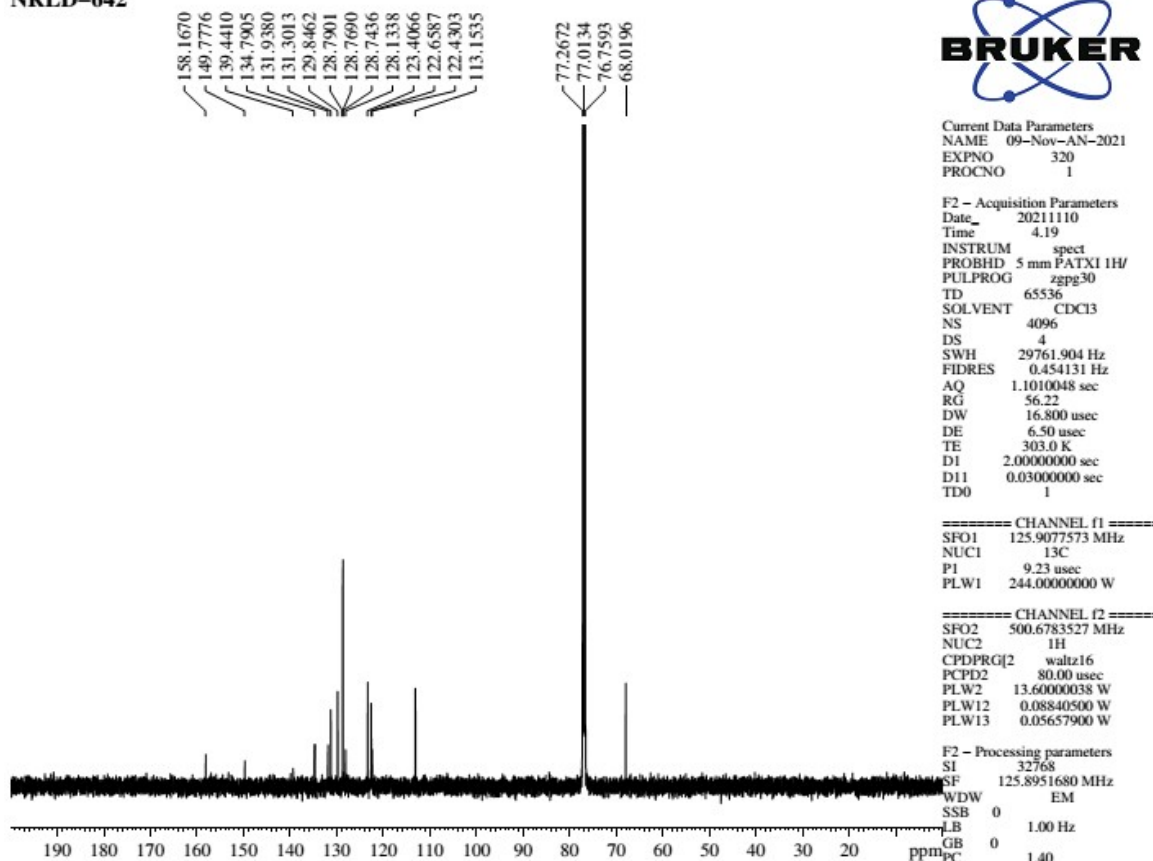

Figure S57: <sup>13</sup>C NMR spectrum of 3y

NRLD-688

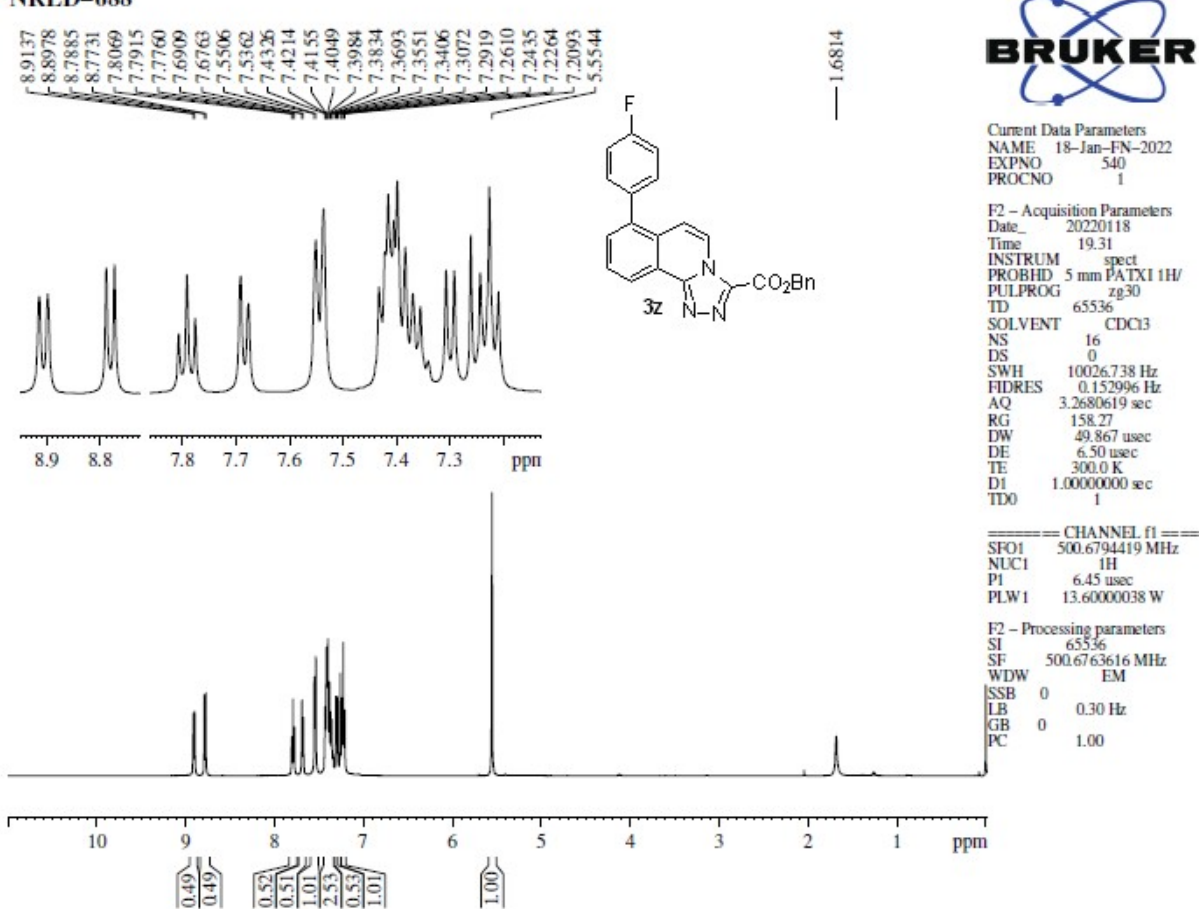

Figure S58: <sup>1</sup>H NMR spectrum of 3z

NRLD-688

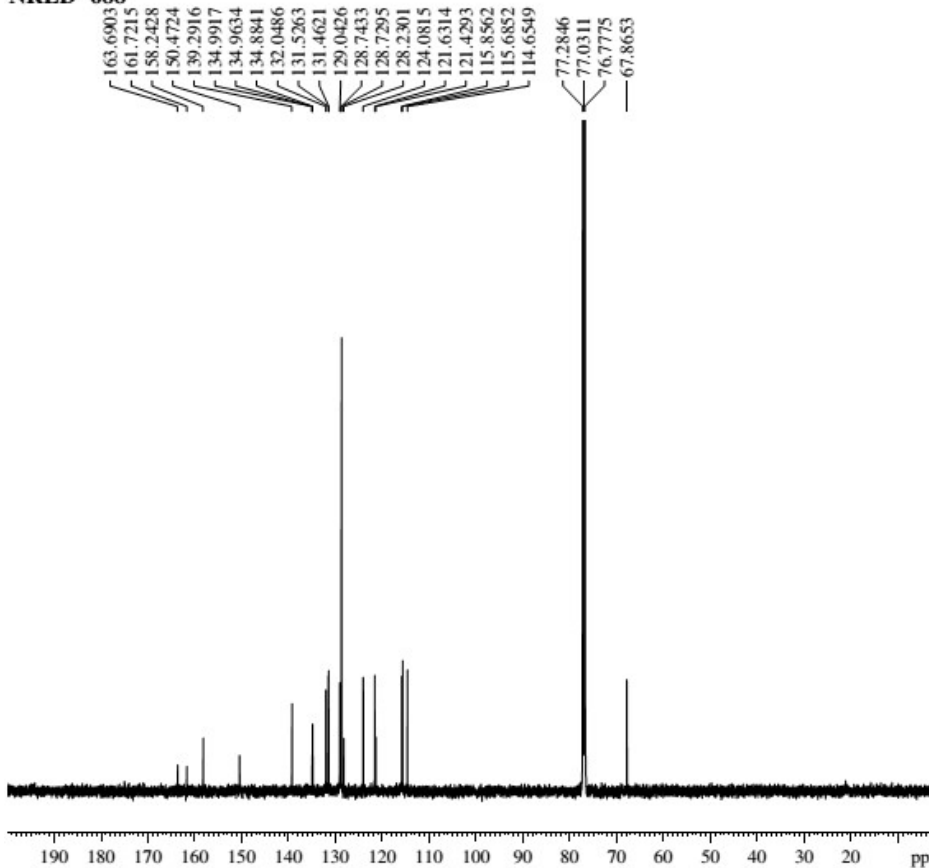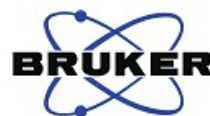

Current Data Parameters  
 NAME 18-Jan-FN-2022  
 EXPNO 550  
 PROCNO 1

F2 - Acquisition Parameters  
 Date\_ 20220118  
 Time 21.21  
 INSTRUM spect  
 PROBHD 5 mm FATXI 1H/  
 PULPROG zgpg30  
 TD 65536  
 SOLVENT CDCl3  
 NS 2048  
 DS 0  
 SWH 29761.904 Hz  
 FIDRES 0.454131 Hz  
 AQ 1.1010048 sec  
 RG 87.95  
 DW 16.800 usec  
 DE 6.50 usec  
 TE 300.0 K  
 D1 2.00000000 sec  
 D11 0.03000000 sec  
 TD0 1

==== CHANNEL f1 ====  
 SFO1 125.9077573 MHz  
 NUC1 13C  
 P1 9.23 usec  
 PLW1 244.00000000 W

==== CHANNEL f2 ====  
 SFO2 500.6783527 MHz  
 NUC2 1H  
 CPDPRG2 waltz16  
 PCPD2 80.00 usec  
 PLW2 13.60000038 W  
 PLW12 0.08840500 W  
 PLW13 0.05657900 W

F2 - Processing parameters  
 SI 32768  
 SF 125.8951680 MHz  
 WDW EM  
 SSB 0  
 LB 1.00 Hz  
 GB 0  
 PC 1.40

Figure S59: <sup>13</sup>C NMR spectrum of 3z

NRLD-688

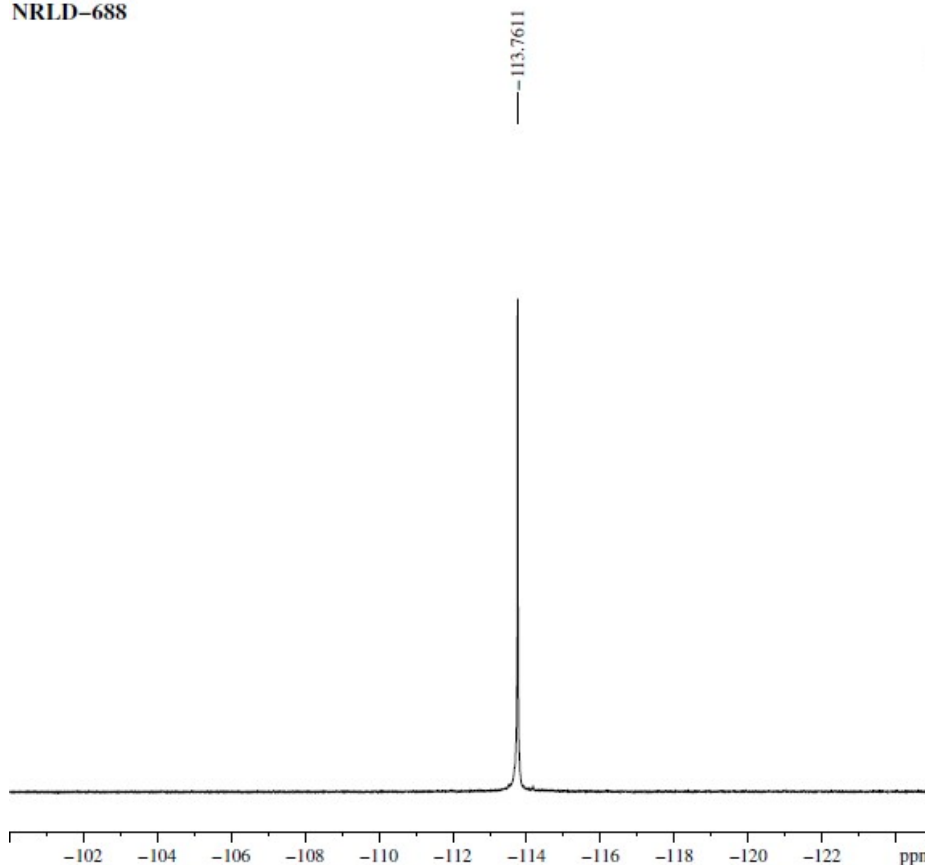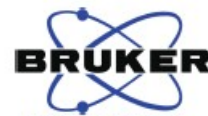

Current Data Parameters  
 NAME 20-Jan-FN-2022  
 EXPNO 580  
 PROCNO 1

F2 - Acquisition Parameters  
 Date\_ 20220121  
 Time 3.57  
 INSTRUM spect  
 PROBHD 5 mm PABBO BB/  
 PULPROG zgfhgqn.2  
 TD 131072  
 SOLVENT CDCl3  
 NS 16  
 DS 4  
 SWH 89285.711 Hz  
 FIDRES 0.681196 Hz  
 AQ 0.7340032 sec  
 RG 201.48  
 DW 5.600 usec  
 DE 6.50 usec  
 TE 300.0 K  
 D1 1.00000000 sec  
 D11 0.03000000 sec  
 D12 0.00002000 sec  
 TD0 1

==== CHANNEL f1 ====  
 SFO1 376.4894122 MHz  
 NUC1 19F  
 P1 15.00 usec  
 PLW1 21.00000000 W

==== CHANNEL f2 ====  
 SFO2 400.1621006 MHz  
 NUC2 1H  
 CPDPRG2 waltz16  
 PCPD2 90.00 usec  
 PLW2 13.00000000 W  
 PLW12 0.27963999 W

F2 - Processing parameters  
 SI 65536  
 SF 376.5270650 MHz  
 WDW EM  
 SSB 0  
 LB 0.30 Hz  
 GB 0  
 PC 1.00

Figure S60: <sup>19</sup>F NMR spectrum of 3z

NRLD-666

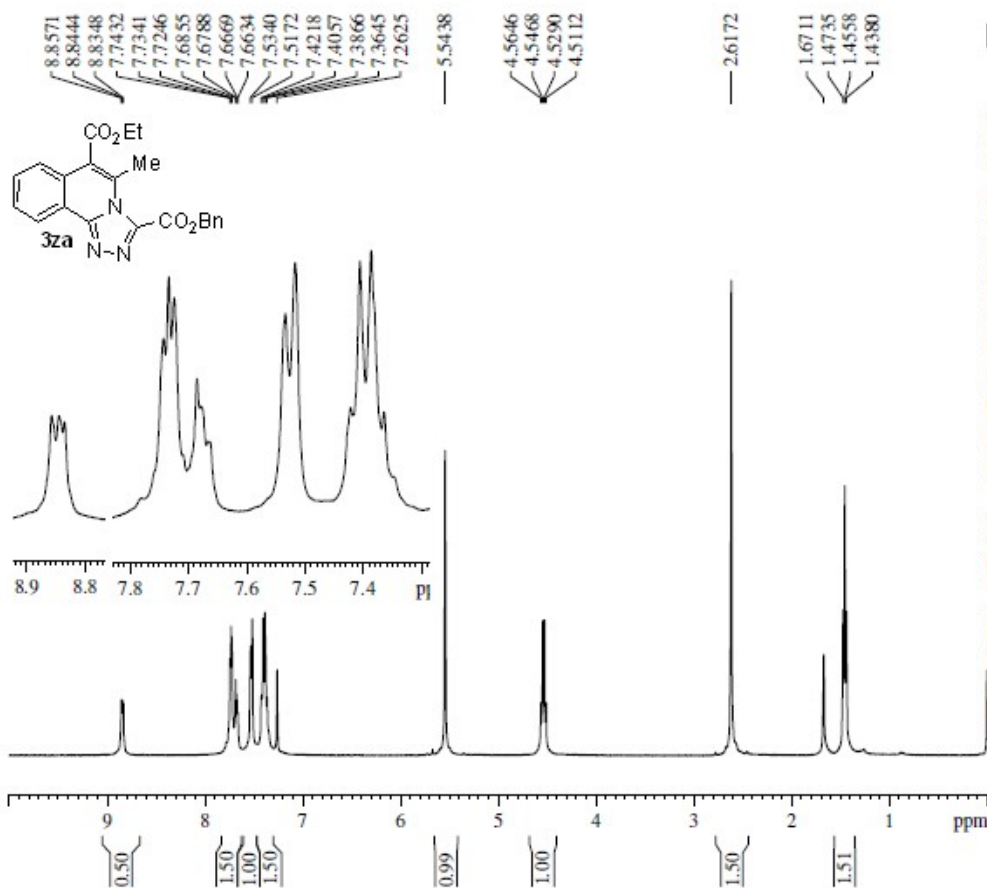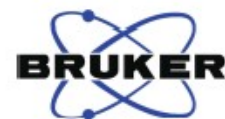

Current Data Parameters  
 NAME 13-Jan-AN-2022  
 EXPNO 40  
 PROCNO 1

F2 - Acquisition Parameters  
 Date\_ 20220113  
 Time 20.42  
 INSTRUM spect  
 PROBHD 5 mm PABBO BB/  
 PULPROG zg30  
 TD 65536  
 SOLVENT CDCl3  
 NS 8  
 DS 0  
 SWH 9615.385 Hz  
 FIDRES 0.146719 Hz  
 AQ 3.4078720 sec  
 RG 129.57  
 DW 52.000 usec  
 DE 6.50 usec  
 TE 300.0 K  
 D1 1.00000000 sec  
 TD0 1

==== CHANNEL f1 ====  
 SFO1 400.1629712 MHz  
 NUC1 1H  
 P1 13.20 usec  
 PLW1 13.00000000 W

F2 - Processing parameters  
 SI 65536  
 SF 400.1605081 MHz  
 WDW EM  
 SSB 0  
 LB 0.30 Hz  
 GB 0  
 PC 1.00

Figure S61: <sup>1</sup>H NMR spectrum of 3za

NRLD-666

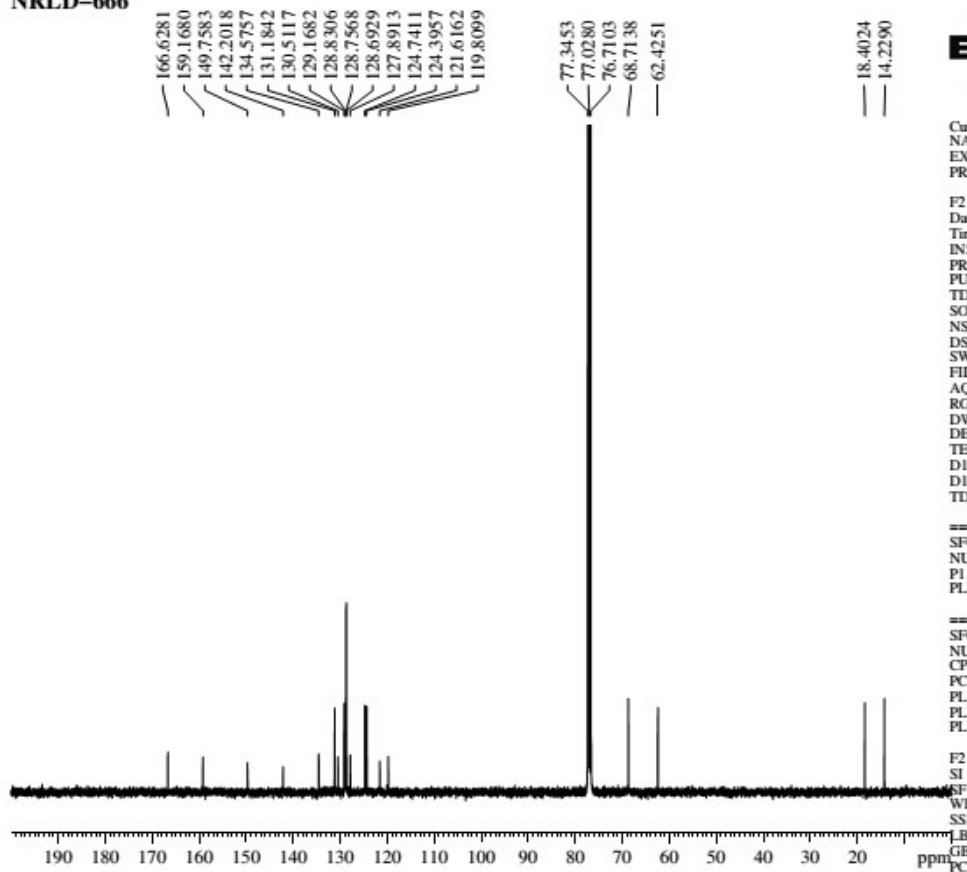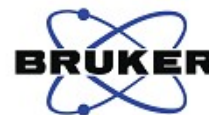

Current Data Parameters  
 NAME 13-Jan-AN-2022  
 EXPNO 450  
 PROCNO 1

F2 - Acquisition Parameters  
 Date\_ 20220113  
 Time 21.29  
 INSTRUM spect  
 PROBHD 5 mm PABBO BB/  
 PULPROG zgpg30  
 TD 65536  
 SOLVENT CDCl3  
 NS 2048  
 DS 0  
 SWH 24038.461 Hz  
 FIDRES 0.366798 Hz  
 AQ 1.3631488 sec  
 RG 201.48  
 DW 20.800 usec  
 DE 6.50 usec  
 TE 300.0 K  
 D1 2.00000000 sec  
 D11 0.03000000 sec  
 TD0 1

==== CHANNEL f1 ====  
 SFO1 100.6304993 MHz  
 NUC1 13C  
 P1 9.90 usec  
 PLW1 53.00000000 W

==== CHANNEL f2 ====  
 SFO2 400.1621006 MHz  
 NUC2 1H  
 CPDPRG2 waltz16  
 PCPD2 90.00 usec  
 PLW2 13.00000000 W  
 PLW12 0.27963999 W  
 PLW13 0.22651000 W

F2 - Processing parameters  
 SI 32768  
 SF 100.6204380 MHz  
 WDW EM  
 SSB 0  
 LB 1.00 Hz  
 GB 0  
 PC 1.40

Figure S62: <sup>13</sup>C NMR spectrum of 3za

NRLD-652

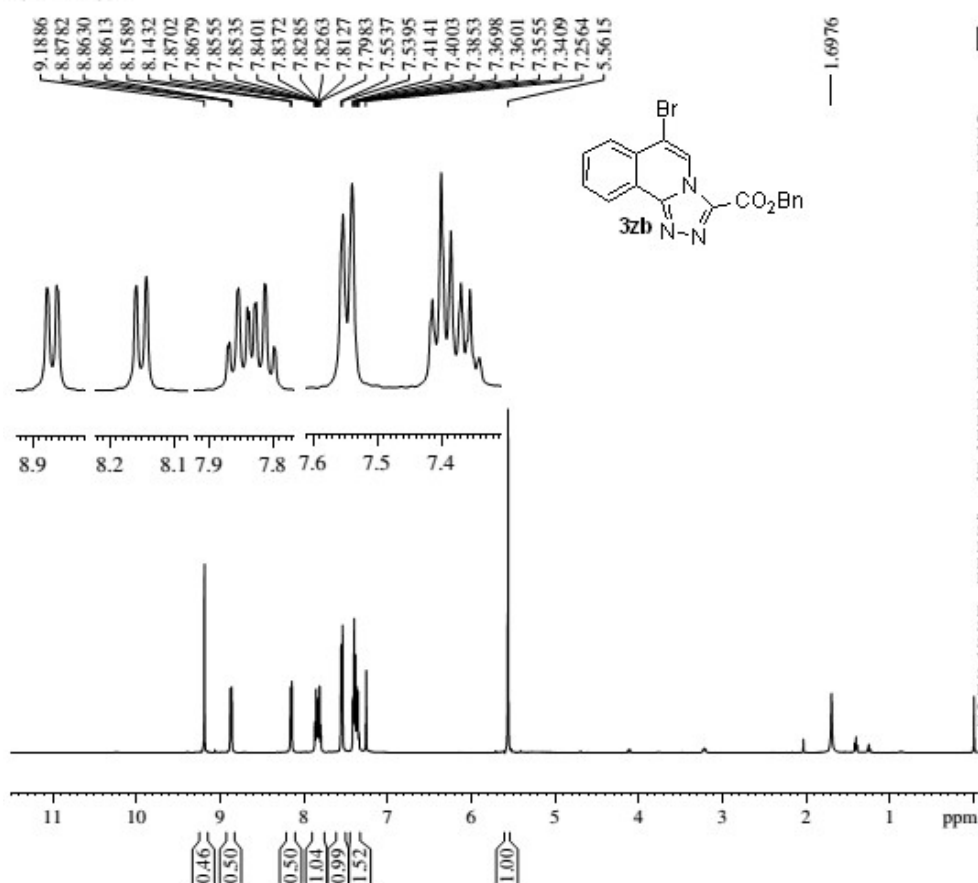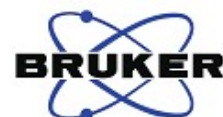

Current Data Parameters  
 NAME 17-Nov-FN-2021  
 EXPNO 460  
 PROCNO 1

F2 - Acquisition Parameters  
 Date\_ 20211117  
 Time 15.04  
 INSTRUM spect  
 PROBHD 5 mm PATXI 1H/  
 PULPROG zg30  
 TD 65536  
 SOLVENT CDCl3  
 NS 16  
 DS 2  
 SWH 10026.738 Hz  
 FIDRES 0.152996 Hz  
 AQ 3.2680619 sec  
 RG 158.27  
 DW 49.867 usec  
 DE 6.50 usec  
 TE 303.0 K  
 D1 1.0000000 sec  
 TD0 1

===== CHANNEL f1 =====  
 SFO1 500.6794419 MHz  
 NUC1 1H  
 P1 6.45 usec  
 PLW1 13.6000038 W

F2 - Processing parameters  
 SI 65536  
 SF 500.6763635 MHz  
 WDW EM  
 SSB 0  
 LB 0.30 Hz  
 GB 0  
 PC 1.00

Figure S63: <sup>1</sup>H NMR spectrum of 3zb

NRLD-652

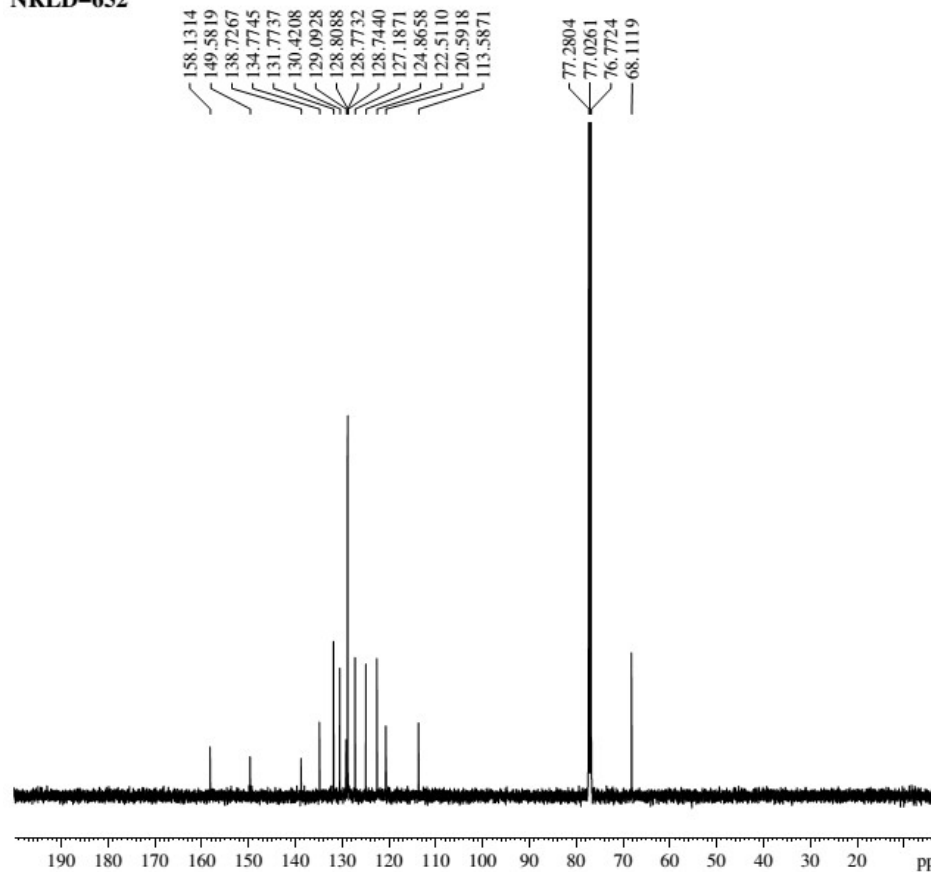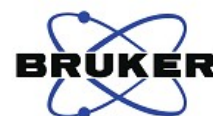

Current Data Parameters  
 NAME 17-Nov-FN-2021  
 EXPNO 470  
 PROCNO 1

F2 - Acquisition Parameters  
 Date\_ 20211117  
 Time 15.58  
 INSTRUM spect  
 PROBHD 5 mm PATXI 1H/  
 PULPROG zgpg30  
 TD 65536  
 SOLVENT CDCl3  
 NS 2048  
 DS 4  
 SWH 29761.904 Hz  
 FIDRES 0.454131 Hz  
 AQ 1.1010048 sec  
 RG 56.22  
 DW 16.800 usec  
 DE 6.50 usec  
 TE 303.0 K  
 D1 2.0000000 sec  
 D11 0.0300000 sec  
 TD0 1

===== CHANNEL f1 =====  
 SFO1 125.9077573 MHz  
 NUC1 13C  
 P1 9.23 usec  
 PLW1 244.0000000 W

===== CHANNEL f2 =====  
 SFO2 500.6783527 MHz  
 NUC2 1H  
 CPDPRG[2] waltz16  
 PCPD2 80.00 usec  
 PLW2 13.6000038 W  
 PLW12 0.08840500 W  
 PLW13 0.05657900 W

F2 - Processing parameters  
 SI 32768  
 SF 125.8951680 MHz  
 WDW EM  
 SSB 0  
 LB 1.00 Hz  
 GB 0  
 PC 1.40

Figure S64: <sup>13</sup>C NMR spectrum of 3zb

NRLD-659

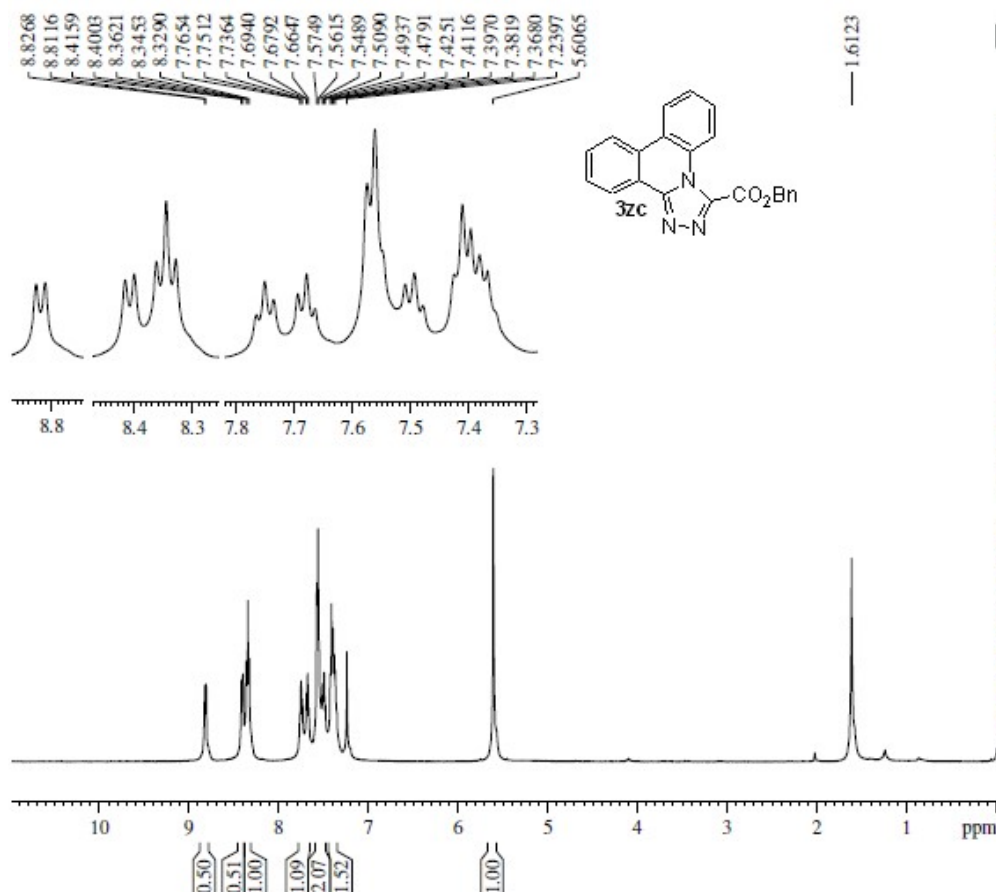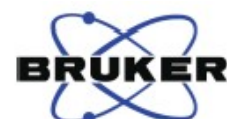

Current Data Parameters  
 NAME 07-Dec-FN-2021  
 EXPNO 570  
 PROCNO 1

F2 - Acquisition Parameters  
 Date\_ 20211207  
 Time 10.18  
 INSTRUM spect  
 PROBHD 5 mm PATX1 1H/  
 PULPROG zg30  
 TD 65536  
 SOLVENT CDCl3  
 NS 16  
 DS 2  
 SWH 10026.738 Hz  
 FIDRES 0.152996 Hz  
 AQ 3.2680619 sec  
 RG 201.78  
 DW 49.867 usec  
 DE 6.50 usec  
 TE 303.0 K  
 D1 1.00000000 sec  
 TD0 1

==== CHANNEL f1 ====  
 SFO1 500.6794419 MHz  
 NUC1 1H  
 P1 6.45 usec  
 PLW1 13.6000038 W

F2 - Processing parameters  
 SI 65536  
 SF 500.6763720 MHz  
 WDW EM  
 SSB 0  
 LB 0.30 Hz  
 GB 0  
 PC 1.00

Figure S65: <sup>1</sup>H NMR spectrum of 3zc

NRLD-659

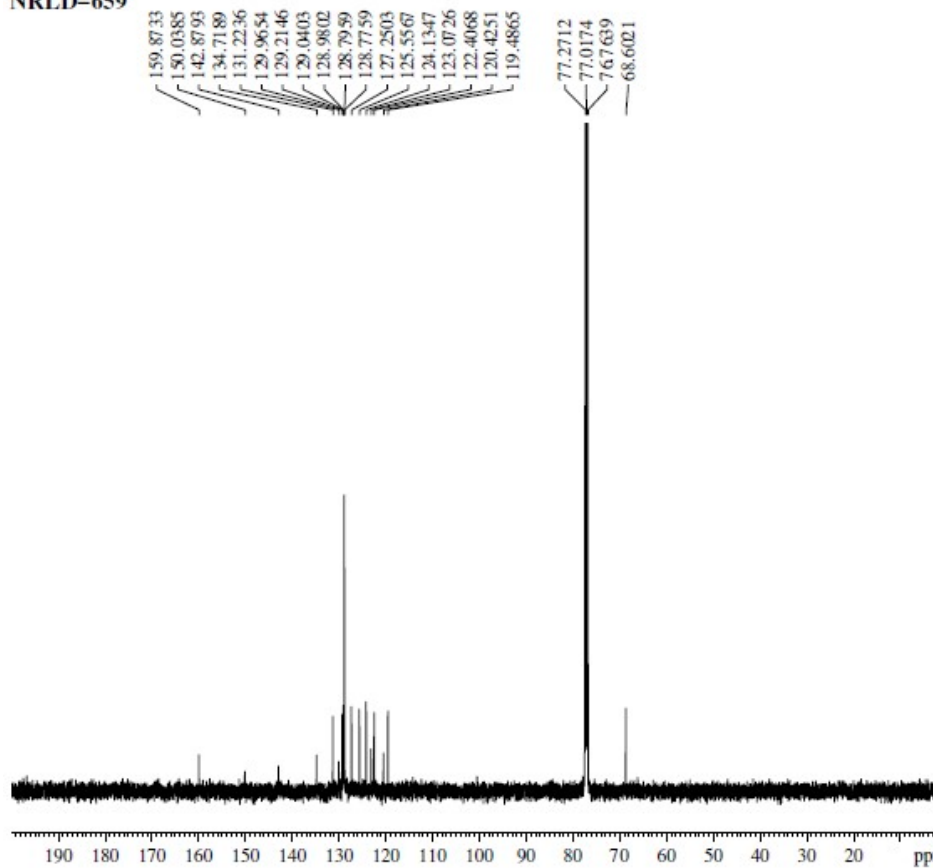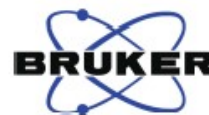

Current Data Parameters  
 NAME 09-Dec-AN-2021  
 EXPNO 600  
 PROCNO 1

F2 - Acquisition Parameters  
 Date\_ 20211209  
 Time 22.02  
 INSTRUM spect  
 PROBHD 5 mm PATX1 1H/  
 PULPROG zgpg30  
 TD 65536  
 SOLVENT CDCl3  
 NS 4096  
 DS 0  
 SWH 29761.904 Hz  
 FIDRES 0.454131 Hz  
 AQ 1.1010048 sec  
 RG 56.22  
 DW 16.800 usec  
 DE 6.50 usec  
 TE 303.0 K  
 D1 2.00000000 sec  
 D11 0.03000000 sec  
 TD0 1

==== CHANNEL f1 ====  
 SFO1 125.9077573 MHz  
 NUC1 13C  
 P1 9.23 usec  
 PLW1 244.0000000 W

==== CHANNEL f2 ====  
 SFO2 500.6783527 MHz  
 NUC2 1H  
 CPDPRG2 waltz16  
 PCPD2 80.00 usec  
 PLW2 13.6000038 W  
 PLW12 0.08840500 W  
 PLW13 0.05657900 W

F2 - Processing parameters  
 SI 32768  
 SF 125.8951680 MHz  
 WDW EM  
 SSB 0  
 LB 1.00 Hz  
 GB 0  
 PC 1.40

Figure S66: <sup>13</sup>C NMR spectrum of 3zc



NRLD-668

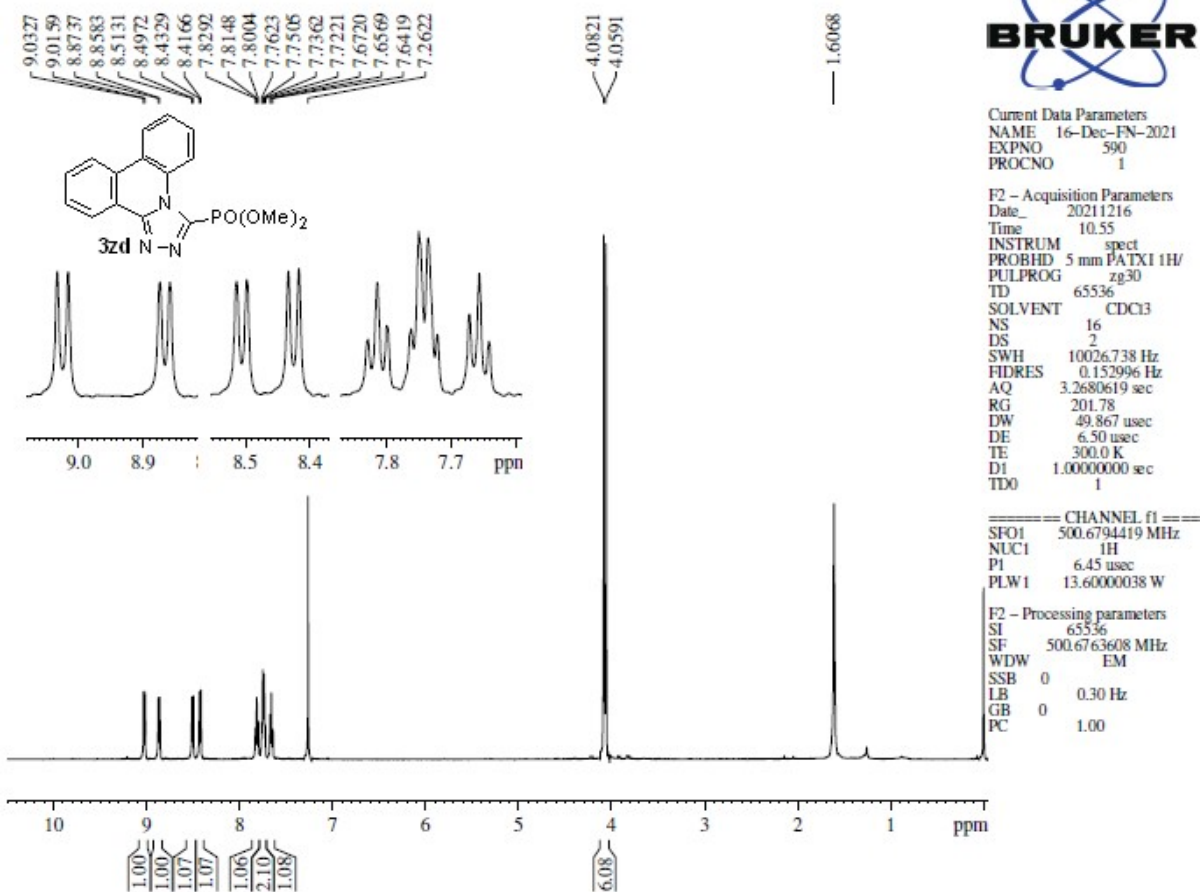

Figure S67: <sup>1</sup>H NMR spectrum of 3zd

NRLD-668

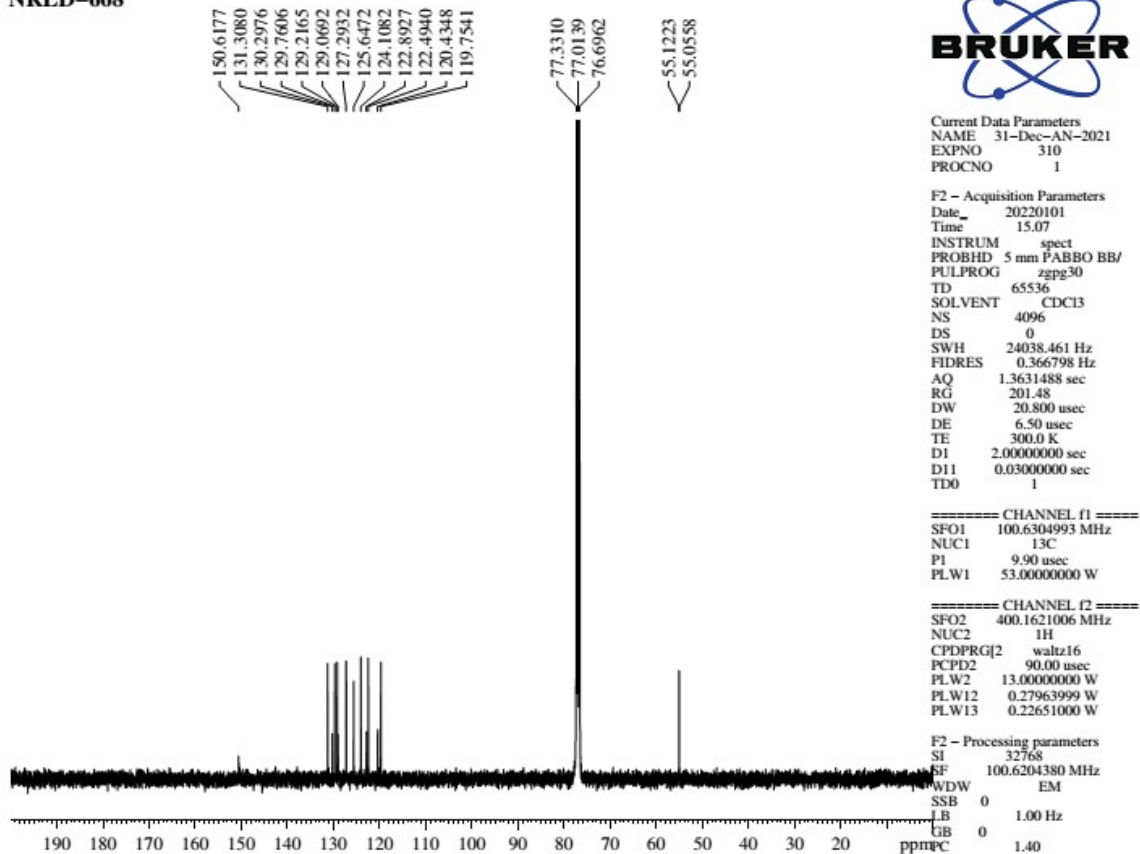

Figure S68: <sup>13</sup>C NMR spectrum of 3zd

NRLD-668

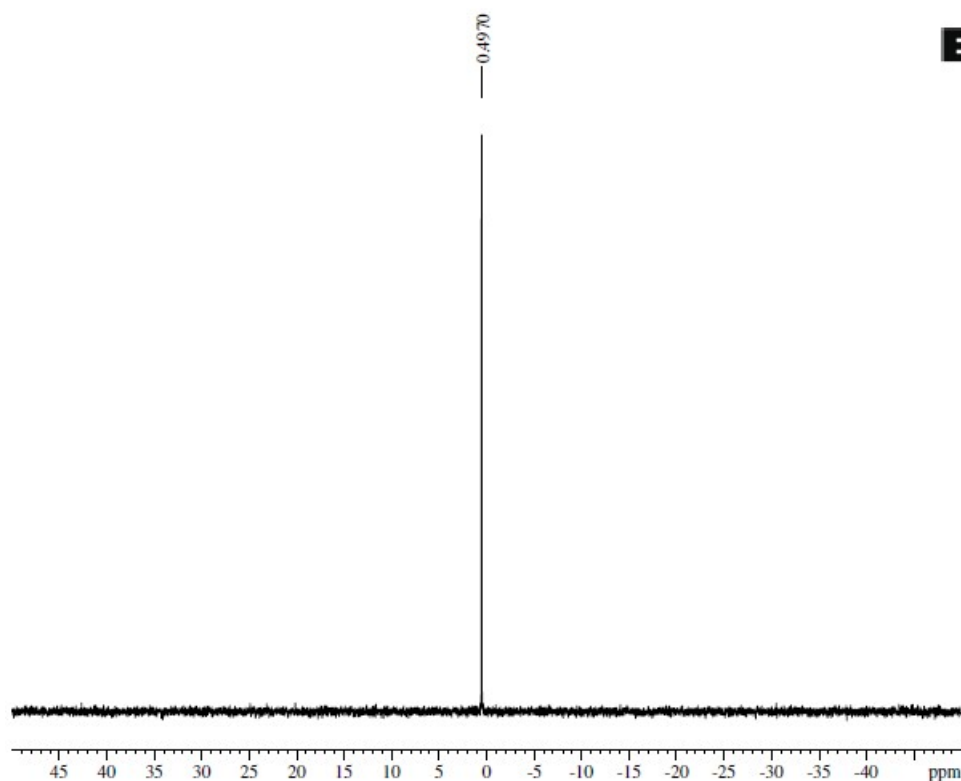

Figure S69: <sup>31</sup>P NMR spectrum of 3zd

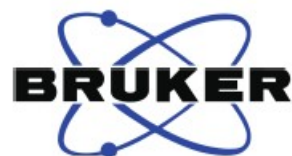

Current Data Parameters  
 NAME 20-Dec-FN-2021  
 EXPNO 590  
 PROCNO 1

F2 - Acquisition Parameters  
 Date\_ 20211220  
 Time 22.33  
 INSTRUM spect  
 PROBHD 5 mm PABBO BBV  
 PULPROG zgpg30  
 TD 65536  
 SOLVENT DMSO  
 NS 16  
 DS 4  
 SWH 64102.563 Hz  
 FIDRES 0.978127 Hz  
 AQ 0.5111808 sec  
 RG 201.48  
 DW 7.800 usec  
 DE 6.50 usec  
 TE 300.3 K  
 D1 2.00000000 sec  
 D11 0.03000000 sec  
 TD0 1

==== CHANNEL f1 =====  
 SFO1 161.9798402 MHz  
 NUC1 31P  
 P1 15.00 usec  
 PLW1 12.00000000 W

==== CHANNEL f2 =====  
 SFO2 400.1621006 MHz  
 NUC2 1H  
 CPDPRG2 waltz16  
 PCPD2 90.00 usec  
 PLW2 13.00000000 W  
 PLW12 0.27363999 W  
 PLW13 0.22651000 W

F2 - Processing parameters  
 SI 32768  
 SF 161.9879400 MHz  
 WDW EM  
 SSB 0  
 LB 1.00 Hz  
 GB 0  
 PC 1.40

NRLD-692

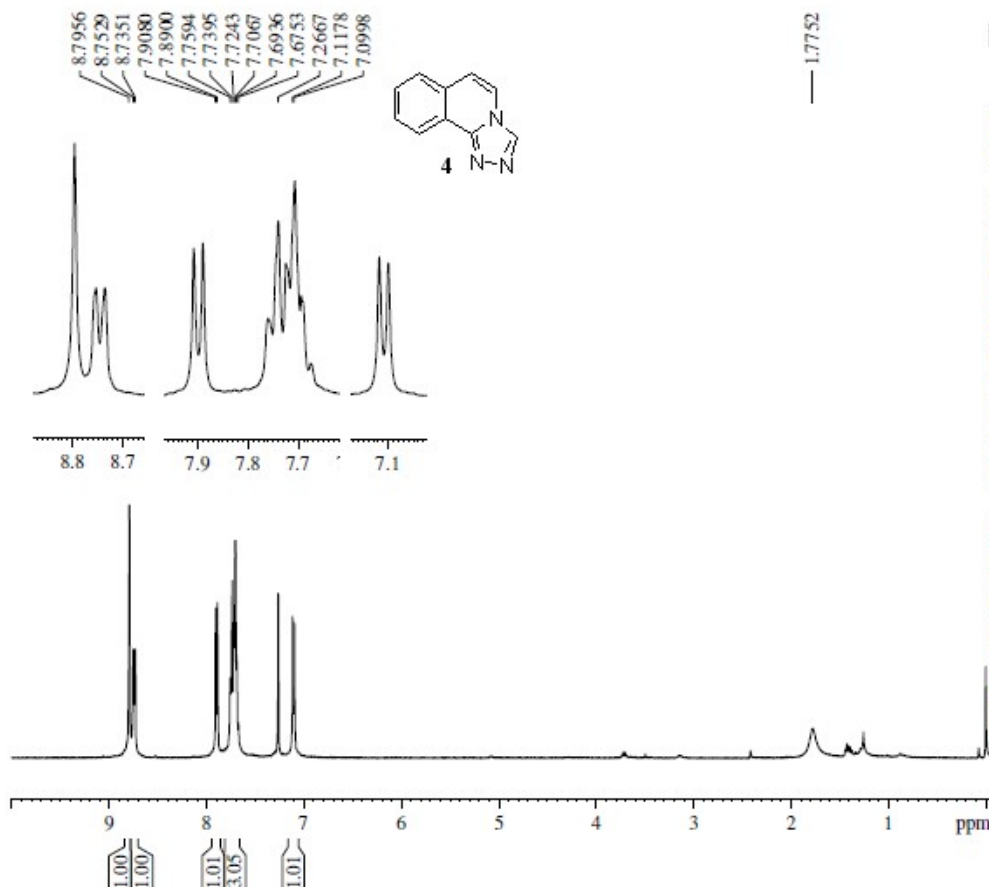

Figure S70: <sup>1</sup>H NMR spectrum of 4

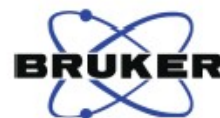

Current Data Parameters  
 NAME 28-Jan-AN-2022  
 EXPNO 310  
 PROCNO 1

F2 - Acquisition Parameters  
 Date\_ 20220128  
 Time 23.06  
 INSTRUM spect  
 PROBHD 5 mm PABBO BBV  
 PULPROG zg30  
 TD 65536  
 SOLVENT CDC13  
 NS 8  
 DS 0  
 SWH 9615.385 Hz  
 FIDRES 0.146719 Hz  
 AQ 3.4078720 sec  
 RG 159.22  
 DW 52.000 usec  
 DE 6.50 usec  
 TE 300.0 K  
 D1 1.00000000 sec  
 TD0 1

==== CHANNEL f1 =====  
 SFO1 400.1629712 MHz  
 NUC1 1H  
 P1 13.20 usec  
 PLW1 13.00000000 W

F2 - Processing parameters  
 SI 65536  
 SF 400.1605070 MHz  
 WDW EM  
 SSB 0  
 LB 0.30 Hz  
 GB 0  
 PC 1.00

NRLD-692

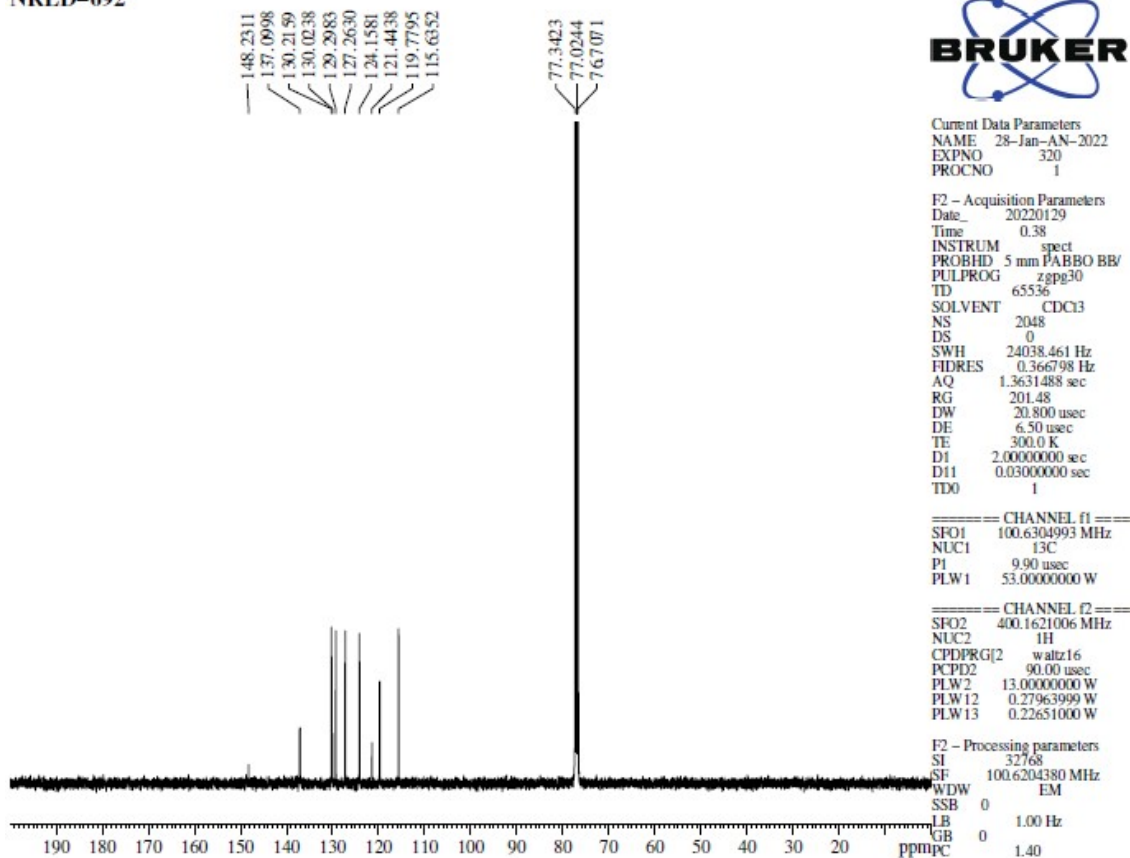

Figure S71: <sup>13</sup>C NMR spectrum of 4

NRLD-693

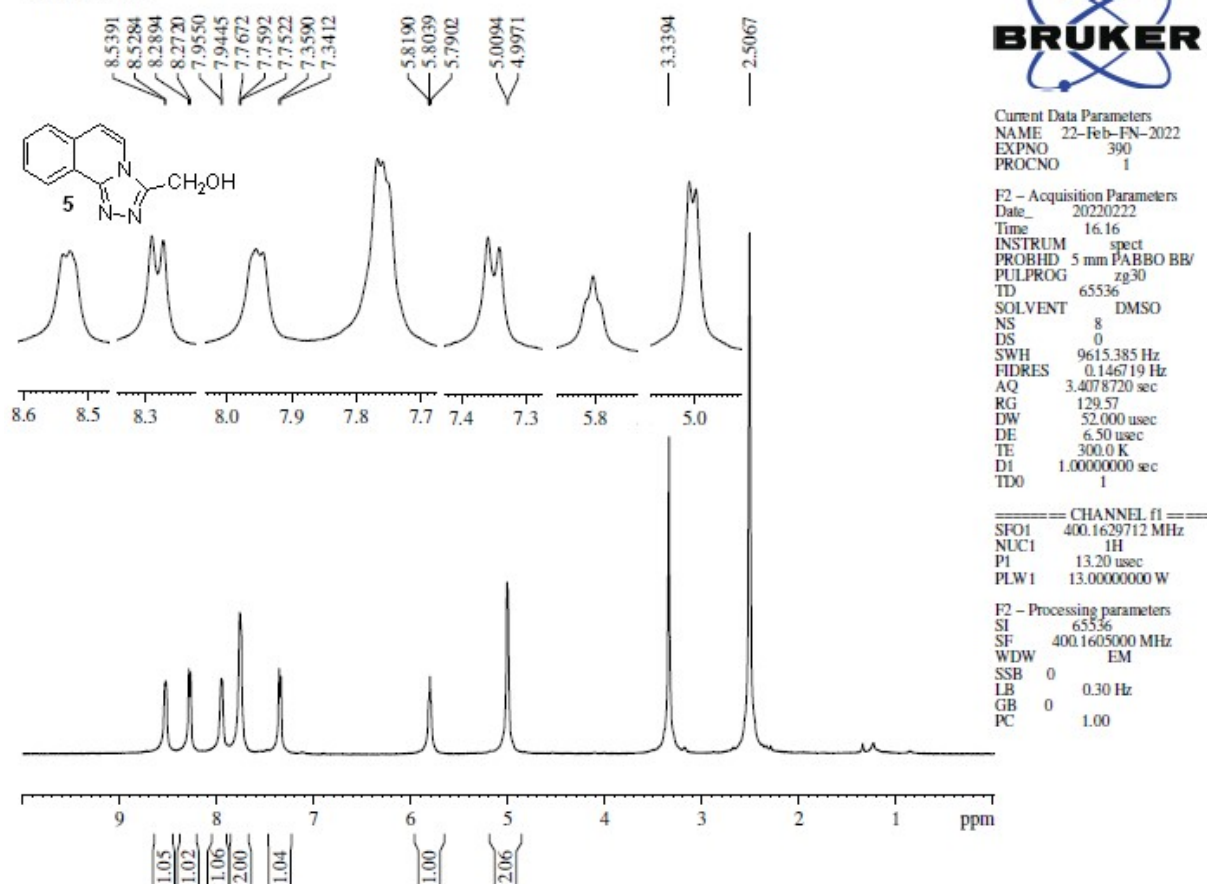

Figure S72: <sup>1</sup>H NMR spectrum of 5

NRLD-693

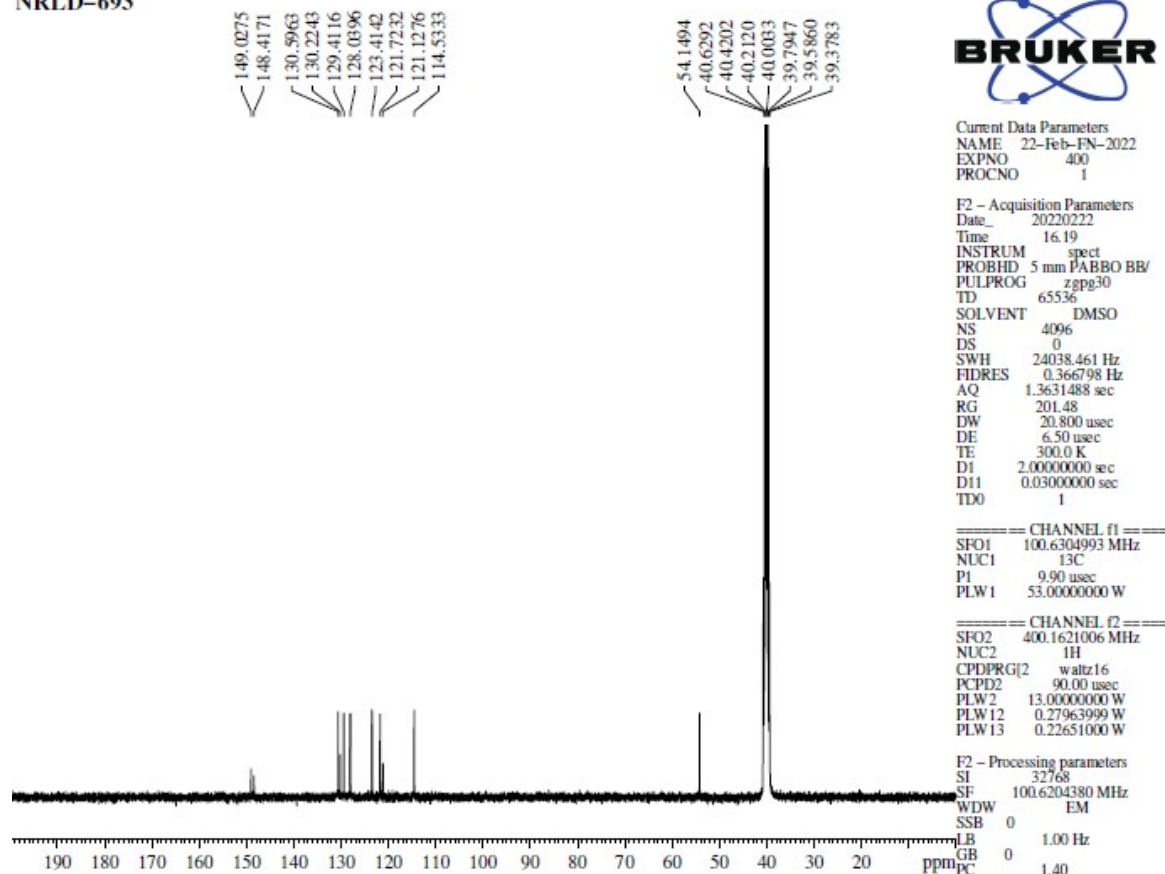

Figure S73: <sup>13</sup>C NMR spectrum of 5

NRLD-689

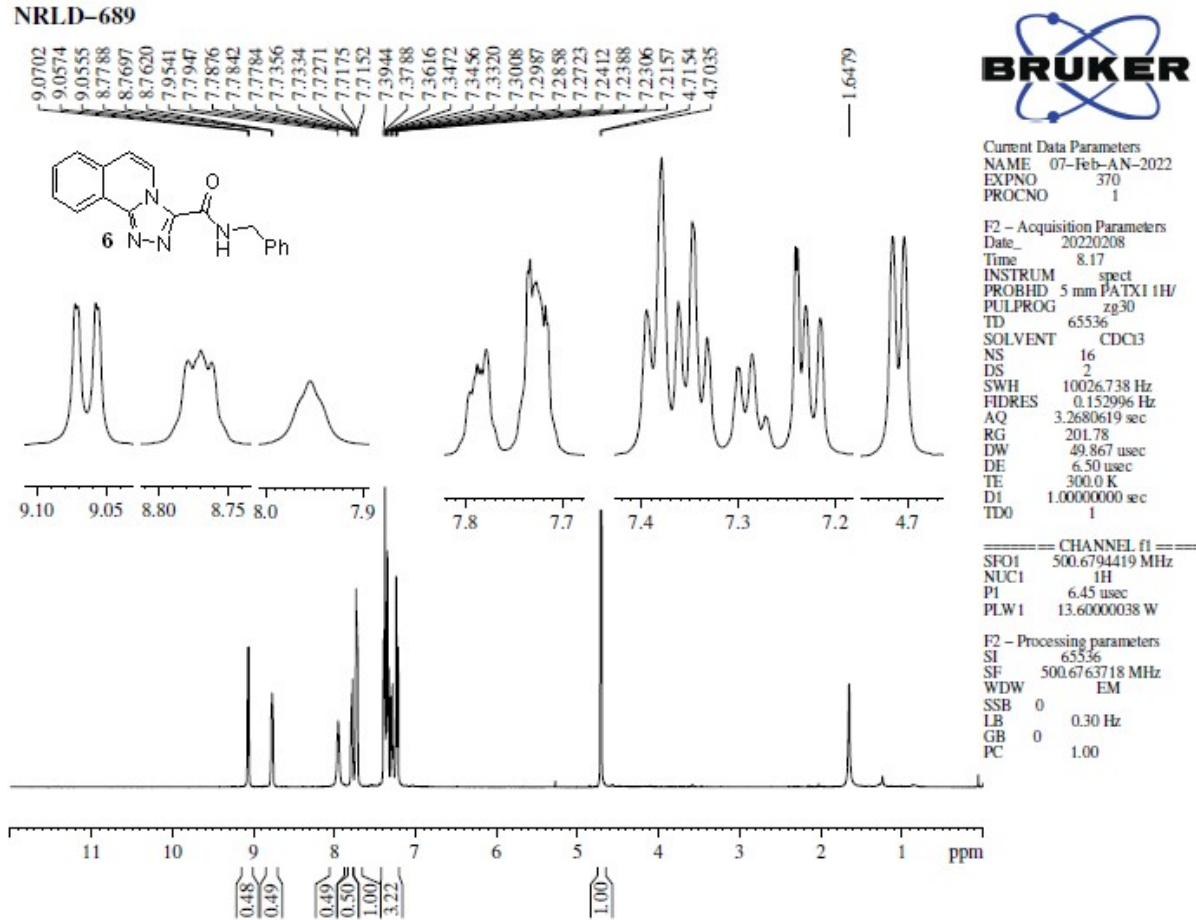

Figure S74: <sup>1</sup>H NMR spectrum of 6

NRLD-689

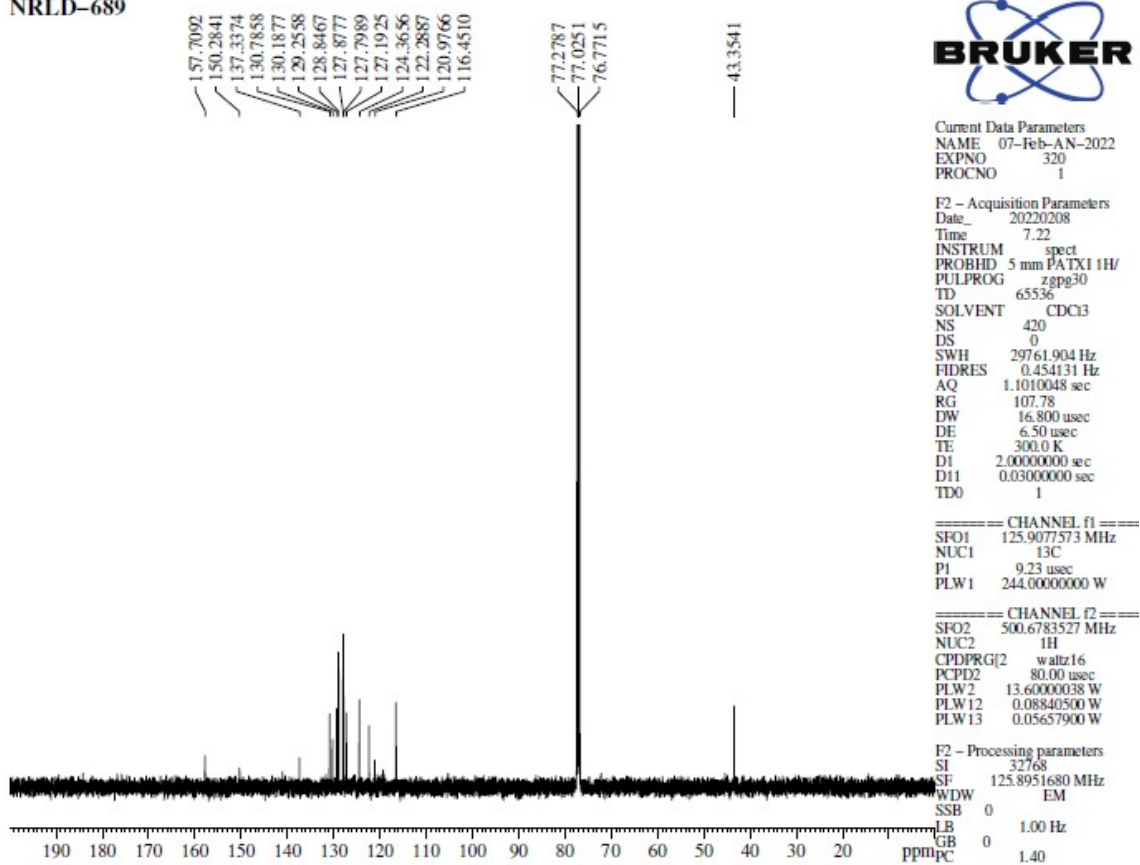

Figure S75: <sup>13</sup>C NMR spectrum of 6
